# Supplementary material for: Synthesis and functionalization of 3-bromo-2-(2-chlorovinyl)benzothiophenes as molecular tools
Source: Royal Society of Chemistry journal article supplement (doi:10.1039/c7ra07340b), 2017-01-01
Supplement: c7ra07340b1.pdf [file c7ra07340b1.pdf]

# Supporting Information

## Synthesis and Functionalization of 3-Bromo-2-(2-chlorovinyl)benzothiophenes as Molecular Tools

*Guangkuan Zhao, Mouad Alami\* and Olivier Provot\**

BioCIS, Equipe Labellisée Ligue Contre le Cancer, Univ Paris-Sud, CNRS, University Paris Saclay, 92290,

Châtenay-Malabry, France Fax: (+33) 146-83-58-87, E-mail: [olivier.provot](mailto:olivier.provot) or [mouad.alami@u-psud.fr](mailto:mouad.alami@u-psud.fr)

### Table of contents

|                                                                                     |              |
|-------------------------------------------------------------------------------------|--------------|
| <b>General experimental methods</b>                                                 | <b>2</b>     |
| <b>Synthesis procedure and corresponding characterization data of new compounds</b> | <b>2-17</b>  |
| <b>References for reported compounds</b>                                            | <b>17</b>    |
| <b>NMR spectra</b>                                                                  | <b>18-59</b> |

### General experimental methods

General Information and Method. All glasswares were oven-dried at 140 °C and all reactions were conducted under an argon atmosphere. Solvents: cyclohexane, ethyl acetate (EtOAc), for chromatography, were technical grade. All new compounds were characterized by <sup>1</sup>H NMR, <sup>13</sup>C NMR, IR spectroscopy, HRMS and elemental analyses. <sup>1</sup>H and <sup>13</sup>C NMR spectra were measured in CDCl<sub>3</sub> with a Bruker Avance 300. <sup>1</sup>H NMR chemical shifts are reported in ppm from an internal standard TMS or of residual chloroform (7.26 ppm). The following abbreviation are used: m (multiplet), s (singlet), d (doublet), t (triplet), dd (doublet of doublet), td (triplet of doublet), ddd (doublet of doublet of doublet). <sup>13</sup>C chemical shifts are reported in ppm from the central peak of deuteriochloroform (77.14). IR spectra were measured on a Bruker Vector 22 spectrophotometer (neat, cm<sup>-1</sup>). High-resolution mass spectra were recorded on a Bruker Daltonics micrOTOF-Q instrument. Elemental analyses (C, H) were performed with a Perkin-Elmer 240 analyzer at the microanalyses Service of the Faculty of Pharmacy at Châtenay-Malabry (France) and were within 0.4% of the theoretical values otherwise stated. Analytical TLC was performed on Merck precoated silica gel 60 F-254 plates. Merck silica gel 60 (230-400 mesh) was used for column chromatography. The plates were visualized by either UV light (254 nm), or by a solution of phosphomolybdic acid in ethanol.

### General Procedure for the Synthesis of (*E*)-Chloroenynes **5a**, **5b** and **18**

To a solution of alkyne (10 mmol) in Et<sub>2</sub>O (150 mL) was added successively (*E*)-1,2-dichloroethylene (8 mL, 100 mmol), PdCl<sub>2</sub>(PPh<sub>3</sub>)<sub>2</sub> (700 mg, 1 mmol), piperidine (2 mL, 20 mmol) and CuI in portions (190 mg, 1 mmol). After complete disappearance of starting material monitored by TLC, the solution was filtered through a pad of celite using EtOAc. The organic layer was washed successively with sat. NH<sub>4</sub>Cl, sat. NaHCO<sub>3</sub> and HCl (1 M) solutions. After drying over MgSO<sub>4</sub> and evaporation in vacuo, the crude residue was purified by silica gel column chromatography.

### (*E*)-(2-(4-Chlorobut-3-en-1-yn-1-yl)phenyl)(methyl) sulfane (**5a**)

brown oil, yield 68%, 1.4 g.

<sup>1</sup>H NMR (300 MHz, CDCl<sub>3</sub>) δ = 7.38 (d, *J* = 7.8 Hz, 1H), 7.30 (t, *J* = 7.8 Hz, 1H), 7.15 (d, *J* = 7.8 Hz, 1H), 7.08 (t, *J* = 7.8 Hz, 1H), 6.68 (d, *J* = 13.5 Hz, 1H), 6.22 (d, *J* = 13.5 Hz, 1H), 2.48 (s, 3H). <sup>13</sup>C NMR (75 MHz, CDCl<sub>3</sub>) δ = 141.6 (Cq), 132.3 (CH), 130.4 (CH), 129.1 (CH), 124.3

(CH), 124.2 (CH), 120.7 (Cq), 113.8 (CH), 90.7 (Cq), 89.3 (Cq), 15.1 (CH<sub>3</sub>). IR (neat): 3069, 2920, 2197, 1687, 1573, 1461, 1431, 1246, 1226, 1165, 1080, 1040, 908, 839, 786, 746, 717, 669 cm<sup>-1</sup>. HRMS (APCI): *m/z* [M+H]<sup>+</sup> calcd for C<sub>11</sub>H<sub>10</sub><sup>35</sup>ClS: 209.0186; found: 209.0195.

**(E)-3-(4-Chlorobut-3-en-1-yn-1-yl)-2-(methylthio) pyridine (5b)**

brown oil, yield 74%, 1.6 g.

<sup>1</sup>H NMR (300 MHz, CDCl<sub>3</sub>) δ = 8.38 (d, *J* = 4.8 Hz, 1H), 7.54 (d, *J* = 7.5 Hz, 1H), 6.94 (dd, *J* = 7.5 Hz, *J* = 4.8 Hz, 1H), 6.71 (d, *J* = 13.8 Hz, 1H), 6.21 (d, *J* = 13.8 Hz, 1H), 2.56 (s, 3H). <sup>13</sup>C NMR (75 MHz, CDCl<sub>3</sub>) δ = 161.8 (Cq), 148.4 (CH), 138.6 (CH), 131.5 (CH), 118.3 (CH), 117.2 (Cq), 113.5 (CH), 93.1 (Cq), 87.1 (Cq), 13.2 (CH<sub>3</sub>). IR (neat): 2926, 2853, 1756, 1587, 1565, 1547, 1385, 1244, 1227, 1137, 1096, 1061, 1029, 915, 848, 794, 774, 741, 664 cm<sup>-1</sup>. HRMS (APCI): *m/z* [M+H]<sup>+</sup> calcd for C<sub>10</sub>H<sub>9</sub><sup>35</sup>ClNS: 210.0139; found: 210.0137.

**(E)-(2-(4-chlorobut-3-en-1-yn-1-yl)phenyl)(methyl) selenane (18)**

brown oil, yield 76%, 1.9 g.

<sup>1</sup>H NMR (300 MHz, CDCl<sub>3</sub>) δ = 7.27 (d, *J* = 7.5 Hz, 1H), 7.19 - 7.13 (m, 2H), 7.06 - 6.99 (m, 1H), 6.58 (d, *J* = 13.5 Hz, 1H), 6.11 (d, *J* = 13.5 Hz, 1H), 2.23 (s, 3H). <sup>13</sup>C NMR (75 MHz, CDCl<sub>3</sub>) δ = 136.4 (Cq), 132.3 (CH), 130.6 (CH), 129.2 (CH), 127.6 (CH), 125.3 (CH), 123.1 (Cq), 113.7 (CH), 90.3 (Cq), 89.9 (Cq), 6.2 (CH<sub>3</sub>). IR (neat): 3069, 2928, 1732, 1588, 1509, 1458, 1424, 1277, 1243, 1223, 1161, 1063, 1030, 913, 844, 791, 749, 714, 656 cm<sup>-1</sup>. HRMS (APCI): *m/z* [M+H]<sup>+</sup> calcd for C<sub>11</sub>H<sub>10</sub><sup>37</sup>ClSe: 256.9628,; found: 256.9635.

**Procedure for the Synthesis of (Z)-5a**

To a solution of alkyne (10 mmol) in Et<sub>2</sub>O (150 mL) was added successively (Z)-1,2-dichloroethylene (8 mL, 100 mmol), PdCl<sub>2</sub>(PPh<sub>3</sub>)<sub>2</sub> (700 mg, 1 mmol), *n*-BuNH<sub>2</sub> (2 mL, 20 mmol) and CuI in portions (190 mg, 1 mmol). After complete disappearance of starting material monitored by TLC, the solution was filtered through a pad of celite using EtOAc. The organic layer was washed successively with sat. NH<sub>4</sub>Cl, sat. NaHCO<sub>3</sub> and HCl (1 M) solutions. After drying over MgSO<sub>4</sub> and evaporation in vacuo, the crude residue was purified by silica gel column chromatography.

**(Z)-(2-(4-Chlorobut-3-en-1-yn-1-yl)phenyl)(methyl) sulfane (5a)**

brown oil, yield 56%, 1.2 g.

<sup>1</sup>H NMR (300 MHz, CDCl<sub>3</sub>) δ = 7.46 (d, *J* = 7.8 Hz, 1H), 7.31 (t, *J* = 7.8 Hz, 1H), 7.18 (d, *J* = 7.8

Hz, 1H), 7.10 (t,  $J = 7.8$  Hz, 1H), 6.47 (d,  $J = 7.5$  Hz, 1H), 6.16 (d,  $J = 7.5$  Hz, 1H), 2.50 (s, 3H).  $^{13}\text{C}$  NMR (75 MHz,  $\text{CDCl}_3$ )  $\delta = 141.8$  (Cq), 132.7 (CH), 129.2 (CH), 128.6 (CH), 124.3 (2 CH), 120.9 (Cq), 112.0 (CH), 94.7 (Cq), 89.6 (Cq), 15.2 ( $\text{CH}_3$ ). IR (neat): 3083, 2920, 2197, 1618, 1590, 1575, 1462, 1434, 1333, 1279, 1242, 1074, 1039, 966, 808, 750, 720, 671, 634  $\text{cm}^{-1}$ . HRMS (APCI):  $m/z$   $[\text{M}+\text{H}]^+$  calcd for  $\text{C}_{11}\text{H}_{10}^{35}\text{ClS}$ : 209.0186; found: 209.0192.

#### **Procedure for the Synthesis of Dichloroenyne 5c**

Triethylamine (40 mL) was added to a stirred mixture of alkyne (3.0 g, 20.2mmol), 2-bromo-1,1-dichloroethylene (5.7 g, 32.3 mmol),  $\text{PdCl}_2(\text{PPh}_3)_2$  (60 mg, 0.085mmol), CuI (27 mg, 0.14mmol) and  $\text{PPh}_3$  (53 mg, 0.2 mmol) under argon atmosphere. The mixture was heated under reflux for 4 h. The precipitated ammonium salt was filtered off, the solvent was evaporated and water (75 mL) was added to the residue. The mixture was extracted with  $\text{Et}_2\text{O}$  (3 x 50 mL), dried over  $\text{MgSO}_4$ , filtered and concentrated under reduced pressure. The residue was purified by silica gel column chromatography.

#### **(2-(4,4-Dichlorobut-3-en-1-yn-1-yl)phenyl)(methyl) sulfane (5c)**

yellow oil, yield 71%, 3.5 g.

$^1\text{H}$  NMR (300 MHz,  $\text{CDCl}_3$ )  $\delta = 7.43$  (d,  $J = 7.5$  Hz, 1H), 7.31 (t,  $J = 7.8$  Hz, 1H), 7.16 (d,  $J = 7.8$  Hz, 1H), 7.09 (t,  $J = 7.5$  Hz, 1H), 6.25 (s, 1H), 2.49 (s, 3H).  $^{13}\text{C}$  NMR (75 MHz,  $\text{CDCl}_3$ )  $\delta = 142.0$  (Cq), 132.7 (CH), 131.9 (Cq), 129.5 (CH), 124.4 (CH), 124.3 (CH), 120.5 (Cq), 111.0 (CH), 95.1 (Cq), 89.5 (Cq), 15.2 ( $\text{CH}_3$ ). IR (neat): 3029, 2920, 2198, 1591, 1573, 1462, 1434, 1291, 1264, 1243, 1164, 1131, 1079, 1041, 1016, 955, 922, 819, 748, 719, 672, 655  $\text{cm}^{-1}$ . HRMS (APCI):  $m/z$   $[\text{M}+\text{H}]^+$  calcd for  $\text{C}_{11}\text{H}_9^{35}\text{Cl}_2\text{S}$ : 242.9797; found: 242.9802.

#### **General Procedure for the Synthesis of (E)-6a, (Z)-6a, (E)-9, (E)-6b, 6c and (E)-19**

To a solution of chloroenyne substrate in  $\text{CH}_2\text{Cl}_2$  (1 mmol) was added MPHT (1.2 equiv), and the resulting solution was stirred at room temperature until disappearance of the starting material (as judged by TLC). The reaction mixture was next treated with a saturated  $\text{Na}_2\text{S}_2\text{O}_3$  solution. The organic layer was washed with 10 % HCl solution (3 x 10 ml) and dried with  $\text{MgSO}_4$ . Removal of the solvent yield a crude product, which was purified by silica gel chromatography.

#### **(E)-3-Bromo-2-(2-chlorovinyl)benzo[b]thiophene 6a<sup>1</sup>**

yellow solid, mp 97.8 - 98.3 °C, yield 88%, 240.1 mg.

$^1\text{H}$  NMR (300 MHz,  $\text{CDCl}_3$ )  $\delta = 7.81 - 7.73$  (m, 2H), 7.48 - 7.39 (m, 2H), 7.26 (d,  $J = 13.5$  Hz,

1H), 6.76 (d,  $J = 13.5$  Hz, 1H).  $^{13}\text{C}$  NMR (75 MHz,  $\text{CDCl}_3$ )  $\delta = 138.2$  (Cq), 136.4 (Cq), 133.0 (Cq), 126.4 (CH), 126.0 (CH), 125.4 (CH), 123.4 (CH), 122.3 (2 CH), 108.7 (Cq). IR (neat): 3055, 1704, 1601, 1504, 1454, 1432, 1320, 1302, 1254, 1229, 1199, 1157, 1015, 920, 866, 786, 760, 746, 719  $\text{cm}^{-1}$ . Anal. Calcd. for  $\text{C}_{10}\text{H}_6\text{BrClS}$ : C 43.90%, H 2.21%. Found C 43.58%, H 2.31%.

**(Z)-3-Bromo-2-(2-chlorovinyl)benzo[b]thiophene 6a**

yellow solid, mp 70.9 -71.8 °C, yield 85%, 232.5 mg.

$^1\text{H}$  NMR (300 MHz,  $\text{CDCl}_3$ )  $\delta = 7.87 - 7.80$  (m, 2H), 7.48 - 7.40 (m, 2H), 7.26 (d,  $J = 7.8$  Hz, 1H), 6.44 (d,  $J = 7.8$  Hz, 1H).  $^{13}\text{C}$  NMR (75 MHz,  $\text{CDCl}_3$ )  $\delta = 138.5$  (Cq), 136.8 (Cq), 131.9 (Cq), 126.3 (CH), 125.3 (CH), 123.4 (CH), 122.7 (CH), 122.3 (CH), 119.8 (CH), 111.2 (Cq). IR (neat): 3076, 3055, 3024, 2924, 2851, 1940, 1908, 1819, 1787, 1733, 1641, 1607, 1556, 1483, 1453, 1431, 1338, 1307, 1260, 1242, 1147, 1018, 922, 867, 807, 767, 749, 721, 638  $\text{cm}^{-1}$ . Anal. Calcd. for  $\text{C}_{10}\text{H}_6\text{BrClS}$ : C 43.90%, H 2.21%. Found C 43.63%, H 2.16%.

**(E)-1-(4-(2-(3-Bromobenzo[b]thiophen-2-yl)vinyl) phenyl)ethanone (9)**

yellow solid, mp 163.0 - 163.4 °C, yield 73%, 260.8 mg.

$^1\text{H}$  NMR (300 MHz,  $\text{CDCl}_3$ )  $\delta = 7.95$  (d,  $J = 8.1$  Hz, 2H), 7.80 - 7.73 (m, 2H), 7.63 - 7.55 (m, 3H), 7.45 - 7.35 (m, 2H), 7.07 (d,  $J = 15.9$  Hz, 1H), 2.61 (s, 3H).  $^{13}\text{C}$  NMR (75 MHz,  $\text{CDCl}_3$ )  $\delta = 197.4$  (Cq), 141.0 (Cq), 138.8 (Cq), 136.8 (Cq), 136.7 (Cq), 136.6 (Cq), 131.2 (CH), 129.0 (2 CH), 126.9 (2 CH), 126.5 (CH), 125.5 (CH), 123.4 (CH), 123.2 (CH), 122.4 (CH), 110.0 (Cq), 26.7 ( $\text{CH}_3$ ). IR (neat): 1679, 1598, 1560, 1433, 1407, 1356, 1300, 1272, 1255, 1020, 961, 938, 923, 856, 812, 778, 753  $\text{cm}^{-1}$ . HRMS (ESI):  $m/z$   $[\text{M}+\text{H}]^+$  calcd for  $\text{C}_{18}\text{H}_{14}\text{OS}^{79}\text{Br}$ : 356.9949; found: 356.9955.

**3-Bromo-2-(2,2-dichlorovinyl)benzo[b]thiophene (6c)**

white solid, mp 113.1 - 113.5 °C, yield 80%, 246.4 mg.

$^1\text{H}$  NMR (300 MHz,  $\text{CDCl}_3$ )  $\delta = 7.85 - 7.78$  (m, 2H), 7.49 - 7.41 (m, 3H).  $^{13}\text{C}$  NMR (75 MHz,  $\text{CDCl}_3$ )  $\delta = 138.1$  (Cq), 137.0 (Cq), 131.1 (Cq), 126.7 (CH), 125.6 (CH), 123.6 (CH), 123.2 (Cq), 122.6 (CH), 122.4 (CH), 111.4 (Cq). IR (neat): 3030, 1747, 1621, 1481, 1452, 1426, 1368, 1325, 1306, 1252, 1220, 1210, 1184, 1086, 1059, 1047, 1034, 1016, 928, 913, 846, 810, 751, 734, 721, 680, 644  $\text{cm}^{-1}$ . Anal. Calcd. for  $\text{C}_{10}\text{H}_5\text{BrCl}_2\text{S}$ : C 38.99%, H 1.64%. Found C 39.20%, H 1.64%.

**(E)-3-Bromo-2-(2-chlorovinyl)thieno[2,3-b]pyridine (6b)**

light yellow solid, mp 131.9 - 132.4 °C, yield 65%, 178.5 mg.

<sup>1</sup>H NMR (300 MHz, CDCl<sub>3</sub>) δ = 8.56 (d, *J* = 4.5 Hz, 1H), 7.99 (d, *J* = 8.1 Hz, 1H), 7.36 (dd, *J* = 8.1 Hz, *J* = 4.5 Hz, 1H), 7.21 (d, *J* = 13.5 Hz, 1H), 6.81 (d, *J* = 13.5 Hz, 1H). <sup>13</sup>C NMR (75 MHz, CDCl<sub>3</sub>) δ = 158.3 (Cq), 148.4 (CH), 133.8 (Cq), 132.6 (Cq), 130.8 (CH), 125.9 (CH), 124.0 (CH), 120.8 (CH), 106.0 (Cq). IR (neat): 3048, 2957, 2923, 1733, 1723, 1603, 1552, 1376, 1317, 1277, 1232, 1196, 966, 885, 791, 765, 672 cm<sup>-1</sup>. HRMS (APCI): *m/z* [M+H]<sup>+</sup> calcd for C<sub>9</sub>H<sub>6</sub><sup>79</sup>Br<sup>35</sup>CINS: 273.9087; found: 273.9086.

**(*E*)-3-Bromo-2-(2-chlorovinyl)benzo[*b*]selenophene 19**

white solid, mp 87.7 - 87.9 °C, yield 93%, 298.1 mg.

<sup>1</sup>H NMR (300 MHz, CDCl<sub>3</sub>) δ = 7.84 (d, *J* = 7.8 Hz, 1H), 7.76 (d, *J* = 7.8 Hz, 1H), 7.43 (t, *J* = 7.5 Hz, 1H), 7.38 - 7.27 (m, 2H), 6.62 (d, *J* = 13.5 Hz, 1H). <sup>13</sup>C NMR (75 MHz, CDCl<sub>3</sub>) δ = 140.2 (Cq), 136.8 (Cq), 134.6 (Cq), 128.5 (CH), 126.8 (CH), 125.9 (CH), 125.8 (CH), 125.4 (CH), 123.2 (CH), 110.8 (Cq). IR (neat): 3044, 1941, 1787, 1724, 1702, 1601, 1508, 1460, 1431, 1310, 1291, 1248, 1226, 1158, 1028, 938, 914, 865, 844, 788, 749, 712 cm<sup>-1</sup>. Anal. Calcd. for C<sub>10</sub>H<sub>6</sub>BrClSe: C 37.48%, H 1.89%. Found C 37.41%, H 1.91%.

**General Procedure for the Synthesis of (*E*)-8a-g, (*Z*)-8a, (*Z*)-8b, 15**

To a mixture of 3-bromobenzo[*b*]thiophene (1 mmol) in toluene (12 mL) and MeOH (6 mL) was successively added the desired boronic acid (1.3 mmol), K<sub>2</sub>CO<sub>3</sub> (276.4 mg, 2 mmol), and [PdCl(dmba)(IMes)] (70.2 mg, 0.1 mmol). The reaction mixture was heated at 90 °C under vigorous stirring and monitored by TLC until complete disappearance of starting material. The solvent was evaporated in vacuo and water (10 mL) was added. After extraction with EtOAc (3 x 10 mL), the combined organic layers were dried with MgSO<sub>4</sub> and the solvent was removed under reduced pressure. The crude material was purified by column chromatography to afford the expected product.

**(*E*)-1-(4-(2-(2-Chlorovinyl)benzo[*b*]thiophen-3-yl) phenyl)ethanone (8a)**

yellow solid, mp 148.7 - 149.3 °C, yield 90%, 281.6 mg.

<sup>1</sup>H NMR (300 MHz, CDCl<sub>3</sub>) δ = 8.11 (d, *J* = 7.8 Hz, 2H), 7.79 (d, *J* = 8.1 Hz, 1H), 7.53 - 7.48 (m, 3H), 7.40 - 7.28 (m, 2H), 6.90 (d, *J* = 13.5 Hz, 1H), 6.67 (d, *J* = 13.5 Hz, 1H), 2.68 (s, 3H). <sup>13</sup>C NMR (75 MHz, CDCl<sub>3</sub>) δ = 197.7 (Cq), 139.3 (Cq), 139.1 (Cq), 137.9 (Cq), 136.5 (Cq), 134.9 (2 Cq), 130.6 (2 CH), 128.8 (2 CH), 126.1 (CH), 125.8 (CH), 125.0 (CH), 123.1 (CH), 122.4 (CH),

121.3 (CH), 26.8 (CH<sub>3</sub>). IR (neat): 3057, 1820, 1734, 1680, 1604, 1564, 1551, 1522, 1492, 1457, 1431, 1403, 1356, 1305, 1285, 1264, 1235, 1209, 1182, 1159, 1131, 1112, 1071, 1018, 958, 924, 906, 877, 837, 790, 763, 732, 679, 657, 645, 626 cm<sup>-1</sup>. HRMS (ESI): m/z [M+H]<sup>+</sup> calcd for C<sub>18</sub>H<sub>14</sub>OS<sup>35</sup>Cl: 313.0454; found: 313.0458.

**(E)-2-(2-Chlorovinyl)-3-(4-methoxyphenyl)benzo [b]thiophene (8b)**

Yellow solid, mp 93.3 - 93.6 °C, yield 74%, 222.6 mg.

<sup>1</sup>H NMR (300 MHz, CDCl<sub>3</sub>) δ = 7.79 (d, *J* = 7.8 Hz, 1H), 7.56 (d, *J* = 7.8 Hz, 1H), 7.39 - 7.28 (m, 4H), 7.06 (d, *J* = 8.1 Hz, 2H), 6.97 (d, *J* = 13.5 Hz, 1H), 6.64 (d, *J* = 13.5 Hz, 1H), 3.91 (s, 3H). <sup>13</sup>C NMR (75 MHz, CDCl<sub>3</sub>) δ = 159.5 (Cq), 140.1 (Cq), 137.9 (Cq), 136.1 (Cq), 133.7 (Cq), 131.5 (2 CH), 126.8 (CH), 126.4 (Cq), 125.6 (CH), 124.7 (CH), 123.5 (CH), 122.3 (CH), 120.1 (CH), 114.3 (2 CH), 55.5 (CH<sub>3</sub>). IR (neat): 3057, 3000, 2957, 2930, 2906, 2835, 1685, 1610, 1573, 1525, 1494, 1460, 1439, 1413, 1356, 1319, 1305, 1287, 1247, 1210, 1176, 1156, 1130, 1109, 1068, 1034, 1017, 924, 874, 834, 805, 788, 762, 733, 682, 659, 624 cm<sup>-1</sup>. HRMS (APCI): m/z [M+H]<sup>+</sup> calcd for C<sub>17</sub>H<sub>14</sub><sup>35</sup>ClOS: 301.0448; found: 301.0451.

**(E)-2-(2-Chlorovinyl)-3-(4-methoxyphenyl)benzo [b]thiophene (8c)**

yellow solid, mp 105.9 - 106.5 °C, yield 88%, 277.0 mg.

<sup>1</sup>H NMR (300 MHz, CDCl<sub>3</sub>) δ = 7.78 (d, *J* = 7.2 Hz, 1H), 7.58 (d, *J* = 7.8 Hz, 1H), 7.39 - 7.29 (m, 2H), 7.02 - 6.84 (m, 4H), 6.65 (d, *J* = 13.5 Hz, 1H), 6.07 (s, 2H). <sup>13</sup>C NMR (75 MHz, CDCl<sub>3</sub>) δ = 148.0 (Cq), 147.6 (Cq), 140.0 (Cq), 137.8 (Cq), 135.8 (Cq), 134.0 (Cq), 127.8 (Cq), 126.7 (CH), 125.6 (CH), 124.8 (CH), 124.1 (CH), 123.5 (CH), 122.3 (CH), 120.3 (CH), 110.6 (CH), 108.7 (CH), 101.4 (CH<sub>2</sub>). IR (neat): 1518, 1501, 1479, 1440, 1425, 1367, 1314, 1272, 1239, 1205, 1117, 1094, 1039, 935, 898, 853, 813, 773, 761, 733 cm<sup>-1</sup>. HRMS (APCI): m/z [M+H]<sup>+</sup> calcd for C<sub>17</sub>H<sub>12</sub><sup>35</sup>ClO<sub>2</sub>S: 315.0241; found: 315.0240.

**(E)-4-(2-(2-Chlorovinyl)benzo[b]thiophen-3-yl)phenol (8d)**

yellow solid, mp 153.0 - 153.7 °C, yield 59%, 169.2 mg.

<sup>1</sup>H NMR (300 MHz, CDCl<sub>3</sub>) δ = 7.81 (d, *J* = 7.5 Hz, 1H), 7.57 (d, *J* = 7.5 Hz, 1H), 7.41 - 7.28 (m, 4H), 7.09 - 6.95 (m, 3H), 6.65 (d, *J* = 13.5 Hz, 1H), 5.33 (br, 1H). <sup>13</sup>C NMR (75 MHz, CDCl<sub>3</sub>) δ = 155.5 (Cq), 140.1 (Cq), 137.9 (Cq), 136.0 (Cq), 133.8 (Cq), 131.7 (2 CH), 126.8 (CH), 126.7 (Cq), 125.6 (CH), 124.8 (CH), 123.5 (CH), 122.3 (CH), 120.1 (CH), 115.8 (2 CH). IR (neat): 3058, 1611, 1594, 1525, 1495, 1431, 1350, 1236, 1205, 1172, 1104, 1039, 1018, 908, 874, 837,

817, 761, 732  $\text{cm}^{-1}$ . HRMS (ESI):  $m/z$   $[M-H]^-$  calcd for  $\text{C}_{16}\text{H}_{10}\text{OS}^{35}\text{Cl}$ : 285.0141; found: 285.0130.

**(E)-3-(3-Chlorophenyl)-2-(2-chlorovinyl)benzo[b] thiophene (8e)**

yellow oil, yield 84%, 256.4 mg.

$^1\text{H}$  NMR (300 MHz,  $\text{CDCl}_3$ )  $\delta$  = 7.82 (d,  $J$  = 7.8 Hz, 1H), 7.57 - 7.28 (m, 7H), 6.94 (d,  $J$  = 13.5 Hz, 1H), 6.70 (d,  $J$  = 13.5 Hz, 1H), 1.47 (cyclohexane).  $^{13}\text{C}$  NMR (75 MHz,  $\text{CDCl}_3$ )  $\delta$  = 139.6 (Cq), 137.9 (Cq), 136.0 (Cq), 134.8 (2 Cq), 134.6 (Cq), 130.2 (CH), 130.1 (CH), 128.6 (CH), 128.3 (CH), 126.2 (CH), 125.8 (CH), 125.0 (CH), 123.2 (CH), 122.3 (CH), 121.1 (CH), 27.0 (cyclohexane). IR (neat): 3058, 1595, 1564, 1517, 1470, 1455, 1432, 1403, 1353, 1317, 1288, 1271, 1234, 1208, 1159, 1132, 1094, 1078, 1019, 998, 953, 925, 894, 875, 846, 809, 785, 846, 809, 785, 760, 731, 713, 693, 650  $\text{cm}^{-1}$ . Anal. Calcd. for  $\text{C}_{16}\text{H}_{10}\text{Cl}_2\text{S}$ : C 62.96%, H 3.30%. Found C 62.52%, H 3.37%.

**(E)-2-(2-Chlorovinyl)-3-(4-vinylphenyl)benzo[b] thiophene (8f)**

yellow solid, mp 74.8 - 75.6  $^{\circ}\text{C}$ , yield 75%, 222.6 mg.

$^1\text{H}$  NMR (300 MHz,  $\text{CDCl}_3$ )  $\delta$  = 7.80 (d,  $J$  = 7.5 Hz, 1H), 7.60 - 7.56 (m, 3H), 7.40 - 7.29 (m, 4H), 6.98 (d,  $J$  = 13.5 Hz, 1H), 6.83 (dd,  $J$  = 17.7 Hz,  $J$  = 10.8 Hz, 1H), 6.66 (d,  $J$  = 13.5 Hz, 1H), 5.87 (d,  $J$  = 17.7 Hz, 1H), 5.36 (d,  $J$  = 10.8 Hz, 1H).  $^{13}\text{C}$  NMR (75 MHz,  $\text{CDCl}_3$ )  $\delta$  = 139.8 (Cq), 138.0 (Cq), 137.3 (Cq), 136.4 (CH), 135.9 (Cq), 134.1 (Cq), 133.7 (Cq), 130.5 (2 CH), 126.6 (3 CH), 125.7 (CH), 124.8 (CH), 123.5 (CH), 122.3 (CH), 120.5 (CH), 114.7 ( $\text{CH}_2$ ). IR (neat): 3057, 1710, 1685, 1629, 1606, 1524, 1493, 1456, 1432, 1402, 1354, 1317, 1288, 1271, 1249, 1234, 1209, 1180, 1158, 1131, 1113, 1068, 1034, 1017, 989, 925, 907, 876, 844, 802, 787, 762, 731  $\text{cm}^{-1}$ . HRMS (APCI):  $m/z$   $[M+H]^+$  calcd for  $\text{C}_{18}\text{H}_{14}^{35}\text{ClS}$ : 297.0499; found: 297.0510.

**(E)-1-(4-(2-(2-Chlorovinyl)thieno[2,3-b]pyridin-3-yl)phenyl)ethanone (8g)**

white solid, mp 166.9 - 167.1  $^{\circ}\text{C}$ , yield 85 %, 267.5 mg.

$^1\text{H}$  NMR (300 MHz,  $\text{CDCl}_3$ )  $\delta$  = 8.55 (d,  $J$  = 3.9 Hz, 1H), 8.12 (d,  $J$  = 7.8 Hz, 2H), 7.77 (d,  $J$  = 8.1 Hz, 1H), 7.49 (d,  $J$  = 7.8 Hz, 2H), 7.30 - 7.23 (m, 1H), 6.93 (d,  $J$  = 13.5 Hz, 1H), 6.75 (d,  $J$  = 13.5 Hz, 1H), 2.68 (s, 3H).  $^{13}\text{C}$  NMR (75 MHz,  $\text{CDCl}_3$ )  $\delta$  = 197.5 (Cq), 160.1 (Cq), 147.8 (CH), 138.2 (Cq), 136.9 (Cq), 135.0 (Cq), 133.2 (Cq), 132.3 (Cq), 130.4 (2 CH), 130.3 (CH), 129.0 (2 CH), 125.9 (CH), 123.0 (CH), 120.3 (CH), 26.8 ( $\text{CH}_3$ ). IR (neat): 3056, 1682, 1605, 1552, 1518, 1486, 1424, 1404, 1384, 1357, 1264, 1234, 1211, 1183, 1017, 959, 928, 878, 839, 795, 753, 728  $\text{cm}^{-1}$ .



HRMS (ESI):  $m/z$   $[M+H]^+$  calcd for  $C_{17}H_{13}NOS^{35}Cl$ : 314.0406; found: 314.0400.

**(Z)-1-(4-(2-(2-Chlorovinyl)benzo[b]thiophen-3-yl)phenyl)ethanone (8a)**

yellow solid, mp 179.1 - 179.8 °C, yield 86%, 240.9 mg.

$^1H$  NMR (300 MHz,  $CDCl_3$ )  $\delta$  = 8.10 (d,  $J$  = 8.1 Hz, 2H), 7.89 (d,  $J$  = 8.1 Hz, 1H), 7.56 - 7.50 (m, 3H), 7.44 - 7.31 (m, 2H), 6.84 (d,  $J$  = 8.1 Hz, 1H), 6.26 (d,  $J$  = 8.1 Hz, 1H), 2.68 (s, 3H).  $^{13}C$  NMR (75 MHz,  $CDCl_3$ )  $\delta$  = 197.7 (Cq), 140.0 (Cq), 139.9 (Cq), 137.9 (Cq), 137.4 (Cq), 136.6 (Cq), 133.8 (Cq), 130.8 (2 CH), 128.7 (2 CH), 125.7 (CH), 124.8 (CH), 123.1 (CH), 122.7 (CH), 122.3 (CH), 118.6 (CH), 26.8 ( $CH_3$ ). IR (neat): 1680, 1603, 1426, 1403, 1356, 1332, 1265, 1181, 1160, 1130, 1072, 1017, 958, 931, 908, 859, 823, 766, 729, 660, 643  $cm^{-1}$ . HRMS (ESI):  $m/z$   $[M+H]^+$  calcd for  $C_{18}H_{14}OS^{35}Cl$ : 313.0454; found: 313.0448.

**(Z)-2-(2-Chlorovinyl)-3-(4-methoxyphenyl)benzo[b] thiophene (8b)**

yellow solid, mp 116.5 - 117.2 °C, yield 85%, 255.7 mg.

$^1H$  NMR (300 MHz,  $CDCl_3$ )  $\delta$  = 7.88 (d,  $J$  = 8.1 Hz, 1H), 7.58 (d,  $J$  = 8.1 Hz, 1H), 7.41 - 7.31 (m, 4H), 7.05 (d,  $J$  = 8.4 Hz, 2H), 6.90 (d,  $J$  = 7.8 Hz, 1H), 6.22 (d,  $J$  = 7.8 Hz, 1H), 3.90 (s, 3H).  $^{13}C$  NMR (75 MHz,  $CDCl_3$ )  $\delta$  = 159.5 (Cq), 139.9 (Cq), 138.7 (Cq), 138.6 (Cq), 132.8 (Cq), 131.7 (2 CH), 127.1 (Cq), 125.5 (CH), 124.5 (CH), 123.5 (CH), 123.3 (CH), 122.2 (CH), 117.4 (CH), 114.2 (2 CH), 55.4 ( $CH_3$ ). IR (neat): 1743, 1685, 1609, 1521, 1484, 1459, 1362, 1331, 1287, 1245, 1175, 1129, 1108, 1033, 851, 825, 788, 765, 730, 663, 643, 622  $cm^{-1}$ . HRMS (APCI):  $m/z$   $[M+H]^+$  calcd for  $C_{17}H_{14}^{35}ClOS$ : 301.0448; found: 301.0449.

**2-(2,2-Dichlorovinyl)-3-(4-methoxyphenyl)benzo[b] thiophene 15**

yellow solid, mp 116.6 - 117.0 °C, yield 83%, 278.3 mg.

$^1H$  NMR (300 MHz,  $CDCl_3$ )  $\delta$  = 7.86 (d,  $J$  = 7.8 Hz, 1H), 7.57 (d,  $J$  = 7.8 Hz, 1H), 7.42 - 7.30 (m, 4H), 7.08 - 7.02 (m, 3H), 3.91 (s, 3H).  $^{13}C$  NMR (75 MHz,  $CDCl_3$ )  $\delta$  = 159.6 (Cq), 139.6 (Cq), 138.8 (Cq), 138.7 (Cq), 131.7 (2 CH), 126.7 (Cq), 125.7 (CH), 124.7 (CH), 123.6 (CH), 123.1 (CH), 122.2 (CH), 120.6 (Cq), 114.4 (2 CH), 55.5 ( $CH_3$ ), one C not seen. IR (neat): 2835, 1609, 1522, 1484, 1461, 1440, 1359, 1287, 1248, 1212, 1179, 1162, 1108, 1035, 912, 839, 813, 764, 735, 664, 645  $cm^{-1}$ . HRMS (APCI):  $m/z$   $[M+H]^+$  calcd for  $C_{17}H_{13}OS^{35}Cl_2$ : 335.0059; found: 335.0057.

**General Procedure for the Synthesis of (E)-11, (E)-11, (Z)-11a, (Z)-11am**

To a mixture of chloroenyne substrate (0.5 mmol) in toluene (6 mL) and MeOH (3 mL) was

successively added the desired boronic acid (0.6 mmol), K<sub>2</sub>CO<sub>3</sub> (138.2 mg, 1 mmol) and Pd(PPh<sub>3</sub>)<sub>4</sub> (28.9 mg, 0.025 mmol). The reaction mixture was heated at 90 °C, under vigorous stirring and monitored by TLC until complete disappearance of starting material. The solvent was evaporated in vacuo and water (10 mL) was added. After extraction with CH<sub>2</sub>Cl<sub>2</sub> (3 x 10 mL), the combined organic layer were dried over MgSO<sub>4</sub>, and the solvent was removed under reduced pressure. The crude material was purified by column chromatography on silica gel.

**(E)-1-(4-(2-(3-(4-acetylphenyl)benzo[b]thiophen-2-yl)vinyl)phenyl)ethan-1-one (1aa)**

yellow solid, mp 199.5 – 199.7 °C.

<sup>1</sup>H NMR (300 MHz, DMSO) δ = 8.18 (d, *J* = 8.1 Hz, 2H), 8.05 (d, *J* = 8.1 Hz, 1H), 7.92 (d, *J* = 8.4 Hz, 2H), 7.68 – 7.63 (m, 4H), 7.55 – 7.33 (m, 4H), 7.24 (d, *J* = 15.9 Hz, 1H), 2.69 (s, 3H), 2.56 (s, 3H). <sup>13</sup>C NMR (75 MHz, DMSO) δ = 198.0 (Cq), 197.6 (Cq), 141.0 (Cq), 139.7 (Cq), 138.9 (Cq), 138.7 (Cq), 138.0 (Cq), 136.7 (Cq), 136.5 (Cq), 135.9 (Cq), 131.3 (CH), 131.0 (2 CH), 129.3 (2 CH), 129.2 (2 CH), 127.3 (2 CH), 126.5 (CH), 125.8 (CH), 123.3 (CH), 123.2 (2 CH), 27.3 (CH<sub>3</sub>), 27.1 (CH<sub>3</sub>). IR (neat): 1678, 1599, 1561, 1456, 1432, 1407, 1357, 1306, 1266, 1223, 1182, 1159, 1112, 1073, 1016, 958, 876, 862, 839, 817, 764, 734, 675, 657, 612 cm<sup>-1</sup>. HRMS (ESI): *m/z* [M+H]<sup>+</sup> calcd for C<sub>26</sub>H<sub>21</sub>O<sub>2</sub>S: 397.1262; found: 397.1272.

**(E)-1-(4-(2-(4-Fluorostyryl)benzo[b]thiophen-3-yl) phenyl)ethanone (1ab)**

yellow solid, mp 163.4 - 164.1 °C, yield 86%, 160.2 mg.

<sup>1</sup>H NMR (300 MHz, CDCl<sub>3</sub>) δ = 8.14 (d, *J* = 7.8 Hz, 2H), 7.82 (d, *J* = 7.8 Hz, 1H), 7.59 - 7.53 (m, 3H), 7.40 - 7.29 (m, 4H), 7.15 - 6.98 (m, 4H), 2.71 (s, 3H). <sup>13</sup>C NMR (75 MHz, CDCl<sub>3</sub>) δ = 197.8 (Cq), 162.6 (d, *J* = 246.9 Hz, Cq), 140.0 (Cq), 139.9 (Cq), 139.3 (Cq), 138.0 (Cq), 136.4 (Cq), 134.6 (Cq), 132.8 (d, *J* = 3.0 Hz, Cq), 130.8 (3 CH), 128.8 (2 CH), 128.3 (d, *J* = 8.3 Hz, 2 CH), 125.5 (CH), 124.9 (CH), 122.8 (CH), 122.4 (CH), 120.6 (CH), 115.8 (d, *J* = 21.6 Hz, 2 CH), 26.8 (CH<sub>3</sub>). <sup>19</sup>F NMR (188 MHz, CDCl<sub>3</sub>): δ = - 111.05. IR (neat): 3060, 1680, 1602, 1564, 1551, 1507, 1491, 1456, 1433, 1403, 1356, 1319, 1304, 1265, 1230, 1214, 1182, 1158, 1112, 1096, 1070, 1016, 951, 933, 907, 875, 854, 816, 778, 763, 731, 684, 656 cm<sup>-1</sup>. HRMS (ESI): *m/z* [M+H]<sup>+</sup> calcd for C<sub>18</sub>H<sub>14</sub><sup>35</sup>ClS: 297.0499; found: 297.0510.

**(E)-2-(4-Fluorostyryl)-3-(4-methoxyphenyl)benzo[b] thiophene (1ac)**

yellow solid, mp 108.2 - 108.9 °C, yield 85%, 153.2 mg.

<sup>1</sup>H NMR (300 MHz, CDCl<sub>3</sub>) δ = 7.81 (d, *J* = 8.4 Hz, 1H), 7.57 (d, *J* = 7.2 Hz, 1H), 7.41 - 7.30 (m, 6H), 7.20 - 6.96 (m, 6H), 3.91 (s, 3H). <sup>13</sup>C NMR (75 MHz, CDCl<sub>3</sub>) δ = 162.5 (d, *J* = 246.2 Hz, Cq), 159.4 (Cq), 140.8 (Cq), 138.1 (2 Cq), 135.9 (Cq), 133.2 (d, *J* = 2.9 Hz, Cq), 131.7 (2 CH),

129.7 (CH), 128.2 (d,  $J = 7.9$  Hz, 2 CH), 127.1 (Cq), 125.3 (CH), 124.6 (CH), 123.2 (CH), 122.3 (CH), 121.5 (CH), 115.8 (d,  $J = 21.7$  Hz, 2 CH), 114.2 (2 CH), 55.5 (CH<sub>3</sub>). <sup>19</sup>F NMR (188 MHz, CDCl<sub>3</sub>):  $\delta = -111.66$ . IR (neat): 2835, 1610, 1528, 1510, 1494, 1460, 1436, 1287, 1248, 1231, 1177, 1157, 1034, 952, 856, 816, 789, 763, 735 cm<sup>-1</sup>. HRMS (ESI):  $m/z$  [M+H]<sup>+</sup> calcd for C<sub>23</sub>H<sub>18</sub>OFS: 361.1062; found: 361.1075.

**(E)-1-(4-(2-(3-(Benzo[d][1,3]dioxol-5-yl)benzo[b]thiophen-2-yl)vinyl)phenyl)ethan-1-one (1ad)**

yellow solid, mp 148.3 - 148.7 °C, yield 85%, 169.4 mg.

<sup>1</sup>H NMR (300 MHz, CDCl<sub>3</sub>)  $\delta = 7.91$  (d,  $J = 8.1$  Hz, 2H), 7.81 (d,  $J = 8.1$  Hz, 1H), 7.59 (d,  $J = 7.2$  Hz, 1H), 7.48 (d,  $J = 8.1$  Hz, 2H), 7.40 - 7.29 (m, 3H), 7.07 - 6.69 (m, 4H), 6.08 (s, 2H), 2.59 (s, 3H). <sup>13</sup>C NMR (75 MHz, CDCl<sub>3</sub>)  $\delta = 197.5$  (Cq), 148.1 (Cq), 147.6 (Cq), 141.6 (Cq), 140.5 (Cq), 138.3 (Cq), 137.9 (Cq), 137.0 (Cq), 136.2 (Cq), 129.7 (CH), 128.9 (2 CH), 128.2 (Cq), 126.7 (2 CH), 125.7 (CH), 124.8 (CH), 124.3 (CH), 124.2 (CH), 123.4 (CH), 122.4 (CH), 110.8 (CH), 108.8 (CH), 101.5 (CH<sub>2</sub>), 26.7 (CH<sub>3</sub>). IR (neat): 1753, 1679, 1599, 1503, 1482, 1367, 1271, 1237, 1220, 1085, 1038, 957, 916, 865, 816, 765, 735 cm<sup>-1</sup>. HRMS (ESI):  $m/z$  [M+H]<sup>+</sup> calcd for C<sub>25</sub>H<sub>19</sub>O<sub>3</sub>S: 399.1055; found: 399.1049.

**(E)-5-(2-(3,4-Dichlorostyryl)benzo[b]thiophen-3-yl)benzo[d][1,3]dioxole (1ae)**

yellow solid, mp 162.2 - 163.1 °C, yield 79%, 168.0 mg.

<sup>1</sup>H NMR (300 MHz, CDCl<sub>3</sub>)  $\delta = 7.81$  (d,  $J = 7.2$  Hz, 1H), 7.58 (d,  $J = 7.2$  Hz, 1H), 7.48 (s, 1H), 7.39 - 7.19 (m, 5H), 7.01 - 6.87 (m, 4H), 6.09 (s, 2H). <sup>13</sup>C NMR (75 MHz, CDCl<sub>3</sub>)  $\delta = 148.1$  (Cq), 147.6 (Cq), 140.6 (Cq), 138.2 (Cq), 137.7 (Cq), 137.1 (2 Cq), 136.7 (Cq), 132.9 (Cq), 131.5 (Cq), 130.7 (CH), 128.4 (CH), 128.2 (CH), 125.7 (CH), 125.6 (CH), 124.8 (CH), 124.2 (CH), 123.4 (CH), 123.3 (CH), 122.3 (CH), 110.7 (CH), 108.8 (CH), 101.5 (CH<sub>2</sub>). IR (neat): 1754, 1680, 1552, 1502, 1483, 1439, 1367, 1314, 1236, 1218, 1132, 1093, 1039, 937, 908, 884, 810, 763, 733, 674 cm<sup>-1</sup>. HRMS (APCI):  $m/z$  [M+H]<sup>+</sup> calcd for C<sub>23</sub>H<sub>15</sub><sup>35</sup>Cl<sub>2</sub>O<sub>2</sub>S: 425.0164; found: 425.0156.

**(E)-4-(2-(3,4-Dichlorostyryl)benzo[b]thiophen-3-yl)phenol (1af)**

yellow solid, mp 153.3 - 154.0 °C, yield 92%, 182.8 mg.

<sup>1</sup>H NMR (300 MHz, CDCl<sub>3</sub>)  $\delta = 7.81$  (d,  $J = 7.5$  Hz, 1H), 7.57 (d,  $J = 7.5$  Hz, 1H), 7.46 (s, 1H), 7.39 - 7.17 (m, 7H), 7.02 (d,  $J = 8.7$  Hz, 2H), 6.89 (d,  $J = 15.9$  Hz, 1H), 5.24 (br, 1H). <sup>13</sup>C NMR (75 MHz, CDCl<sub>3</sub>)  $\delta = 155.5$  (Cq), 140.6 (Cq), 138.2 (Cq), 137.4 (Cq), 137.2 (Cq), 136.8 (Cq),

132.9 (Cq), 131.9 (2 CH), 131.4 (Cq), 130.6 (CH), 128.3 (CH), 128.2 (CH), 127.1 (Cq), 125.7 (CH), 125.6 (CH), 124.7 (CH), 123.4 (2 CH), 122.4 (CH), 115.8 (2 CH). IR (neat): 1611, 1583, 1552, 1527, 1496, 1471, 1433, 1393, 1355, 1317, 1266, 1219, 1172, 1129, 1101, 1029, 941, 906, 880, 846, 810  $\text{cm}^{-1}$ . HRMS (ESI):  $m/z$   $[\text{M}-\text{H}]^-$  calcd for  $\text{C}_{22}\text{H}_{13}\text{OS}^{35}\text{Cl}_2$ : 395.0064; found: 395.0064.

**(E)-3-(4-Methoxyphenyl)-2-(3-methoxystyryl)benzo [b]thiophene (1ag)**

yellow oil, yield 89%, 165.8 mg.

$^1\text{H}$  NMR (300 MHz,  $\text{CDCl}_3$ )  $\delta$  = 7.84 (d,  $J$  = 8.4 Hz, 1H), 7.60 (d,  $J$  = 8.4 Hz, 1H), 7.44 - 7.24 (m, 6H), 7.12 - 6.97 (m, 5H), 6.84 (d,  $J$  = 8.1 Hz, 1H), 3.94 (s, 3H), 3.84 (s, 3H).  $^{13}\text{C}$  NMR (75 MHz,  $\text{CDCl}_3$ )  $\delta$  = 159.9 (Cq), 159.4 (Cq), 140.8 (Cq), 138.5 (Cq), 138.1 (2 Cq), 136.0 (Cq), 131.7 (2 CH), 130.8 (CH), 129.7 (CH), 127.1 (Cq), 125.3 (CH), 124.6 (CH), 123.2 (CH), 122.3 (CH), 122.1 (CH), 119.3 (CH), 114.2 (2 CH), 113.4 (CH), 112.3 (CH), 55.5 ( $\text{CH}_3$ ), 55.4 ( $\text{CH}_3$ ). IR (neat): 2834, 1734, 1608, 1597, 1575, 1528, 1498, 1460, 1435, 1347, 1287, 1246, 1209, 1176, 1156, 1108, 1034, 949, 908, 846, 815, 782, 762, 734, 687  $\text{cm}^{-1}$ . HRMS (ESI):  $m/z$   $[\text{M}+\text{H}]^+$  calcd for  $\text{C}_{24}\text{H}_{21}\text{O}_2\text{S}$ : 373.1262; found: 373.1254.

**(E)-3-(4-Methoxyphenyl)-2-(3,4,5-trimethoxystyryl) benzo[b]thiophene (1ah)**

yellow solid, mp 167.4 - 167.7  $^\circ\text{C}$ , yield 87%, 188.2 mg.

$^1\text{H}$  NMR (300 MHz,  $\text{CDCl}_3$ )  $\delta$  = 7.81 (d,  $J$  = 7.2 Hz, 1H), 7.58 (d,  $J$  = 7.2 Hz, 1H), 7.43 - 7.29 (m, 4H), 7.17 - 6.94 (m, 4H), 6.64 (s, 2H), 3.91 - 3.85 (m, 12H).  $^{13}\text{C}$  NMR (75 MHz,  $\text{CDCl}_3$ )  $\delta$  = 159.4 (Cq), 153.5 (2 Cq), 140.8 (Cq), 138.1 (Cq), 138.0 (Cq), 135.6 (Cq), 132.8 (Cq), 131.7 (2 CH), 131.1 (CH), 127.2 (Cq), 125.2 (CH), 124.6 (CH), 123.2 (CH), 122.3 (CH), 121.2 (CH), 114.2 (2 CH), 104.0 (2 CH), 61.1 ( $\text{CH}_3$ ), 56.4 (2  $\text{CH}_3$ ), 55.5 ( $\text{CH}_3$ ), one C not seen. IR (neat): 1734, 1610, 1578, 1527, 1506, 1494, 1463, 1453, 1416, 1357, 1335, 1287, 1247, 1234, 1177, 1153, 1126, 1104, 1034, 1005, 942, 908, 845, 812, 788, 764  $\text{cm}^{-1}$ . HRMS (ESI):  $m/z$   $[\text{M}+\text{Na}]^+$  calcd for  $\text{C}_{26}\text{H}_{24}\text{O}_4\text{NaS}$ : 455.1293; found: 455.1302.

**(E)-4-(2-(3-(4-methoxyphenyl)benzo[b]thiophen-2-yl)vinyl)pyridine (1ai)**

yellow oil and solid, yield 75%, 128.8 mg.

$^1\text{H}$  NMR (300 MHz, DMSO)  $\delta$  = 8.51 (d,  $J$  = 5.7 Hz, 2H), 8.00 (d,  $J$  = 7.8 Hz, 1H), 7.54 (d,  $J$  = 7.8 Hz, 1H), 7.48 - 7.35 (m, 7H), 7.16 (d,  $J$  = 8.7 Hz, 2H), 7.08 (d,  $J$  = 16.2 Hz, 1H), 3.87 (s, 3H).  $^{13}\text{C}$  NMR (75 MHz, DMSO)  $\delta$  = 159.6 (Cq), 150.6 (2 CH), 143.8 (Cq), 140.1 (Cq), 138.1 (Cq), 137.8 (Cq), 136.8 (Cq), 131.9 (2

CH), 128.7 (CH), 126.5 (CH), 126.0 (Cq), 125.6 (CH), 125.5 (CH), 123.6 (CH), 123.1 (CH), 121.2 (2 CH), 114.9 (2 CH), 55.7 (CH<sub>3</sub>). IR (neat): 1593, 1553, 1526, 1501, 1486, 1460, 1415, 1358, 1285, 1247, 1177, 1156, 1109, 1068, 1032, 964, 944, 838, 814, 800, 765, 735 cm<sup>-1</sup>. HRMS (ESI): m/z [M+H]<sup>+</sup> calcd for C<sub>22</sub>H<sub>18</sub>NOS: 344.1109; found: 344.1106.

**(E)-1-(4-(2-(2-(benzo[b]thiophen-2-yl)vinyl)benzo[b]thiophen-3-yl)phenyl)ethan-1-one (1aj)**

yellow solid, mp 206.9 – 207.2 °C, yield 80%, 164.2 mg.

<sup>1</sup>H NMR (300 MHz, DMSO) δ = 8.19 (d, *J* = 7.8 Hz, 2H), 8.03 (d, *J* = 7.8 Hz, 1H), 7.90 – 7.85 (m, 1H), 7.81 – 7.76 (m, 1H), 7.65 (d, *J* = 8.1 Hz, 2H), 7.59 – 7.33 (m, 7H), 7.01 (d, *J* = 15.9 Hz, 1H), 2.69 (s, 3H). <sup>13</sup>C NMR (75 MHz, DMSO) δ = 198.1 (Cq), 141.8 (Cq), 140.3 (Cq), 139.6 (Cq), 138.9 (Cq), 138.8 (Cq), 138.2 (Cq), 137.9 (Cq), 136.7 (Cq), 135.5 (Cq), 131.0 (2 CH), 129.3 (2 CH), 126.5 (CH), 126.0 (CH), 125.9 (CH), 125.8 (CH), 125.7 (CH), 125.4 (CH), 124.4 (CH), 123.2 (CH), 123.1 (CH), 122.9 (CH), 122.4 (CH), 27.3 (CH<sub>3</sub>). IR (neat): 1679, 1602, 1552, 1530, 1455, 1436, 1403, 1356, 1307, 1264, 1213, 1182, 1159, 1111, 1069, 1016, 958, 933, 855, 817, 764, 747, 734, 726 cm<sup>-1</sup>. HRMS (ESI): m/z [M+H]<sup>+</sup> calcd for C<sub>26</sub>H<sub>20</sub>OS<sub>2</sub>: 411.0877; found: 411.0869.

**(E)-1-(4-(2-(3-(4-Fluorophenyl)benzo[b]thiophen-2-yl)vinyl)phenyl)ethanone (1ak)**

yellow solid, mp 144.3 - 144.5 °C, yield 82%, 152.7 mg.

<sup>1</sup>H NMR (300 MHz, CDCl<sub>3</sub>) δ = 7.93 (d, *J* = 8.4 Hz, 2H), 7.85 (d, *J* = 7.5 Hz, 1H), 7.57 - 7.24 (m, 10H), 7.08 (d, *J* = 16.9 Hz, 1H), 2.61 (s, 3H). <sup>13</sup>C NMR (75 MHz, CDCl<sub>3</sub>) δ = 197.4 (Cq), 162.7 (d, *J* = 246.2 Hz, Cq), 141.4 (Cq), 140.4 (Cq), 138.3 (Cq), 138.2 (Cq), 136.3 (Cq), 136.2 (Cq), 132.2 (d, *J* = 8.0 Hz, 2 CH), 130.6 (d, *J* = 3.1 Hz, Cq), 130.1 (CH), 129.0 (2 CH), 126.7 (2 CH), 125.8 (CH), 124.9 (CH), 123.8 (CH), 123.2 (CH), 122.4 (CH), 115.9 (d, *J* = 21.4 Hz, 2 CH), 26.7 (CH<sub>3</sub>). <sup>19</sup>F NMR (188 MHz, CDCl<sub>3</sub>): δ = - 111.67. IR (neat): 1679, 1599, 1561, 1526, 1492, 1433, 1409, 1358, 1305, 1269, 1258, 1223, 1182, 1158, 1095, 1015, 958, 943, 908, 861, 842, 815, 764 cm<sup>-1</sup>. HRMS (ESI): m/z [M+H]<sup>+</sup> calcd for C<sub>24</sub>H<sub>18</sub>OFS: 373.1062; found: 373.1067.

**(E)-1-(4-(4-(2-(methylthio)phenyl)but-1-en-3-yn-1-yl)phenyl)ethanone 11**

white solid, mp 80.1 - 80.3 °C, yield 71%, 103.8 mg.

<sup>1</sup>H NMR (300 MHz, CDCl<sub>3</sub>) δ = 7.92 (d, *J* = 8.4 Hz, 2H), 7.50 (d, *J* = 8.4 Hz, 2H), 7.43 (d, *J* = 7.5 Hz, 1H), 7.30 (t, *J* = 7.5 Hz, 1H), 7.18 - 7.06 (m, 3H), 6.57 (d, *J* = 16.2 Hz, 1H), 2.59 (s, 3H), 2.51 (s, 3H). <sup>13</sup>C NMR (75 MHz, CDCl<sub>3</sub>) δ = 197.4 (Cq), 141.8 (Cq), 140.8 (Cq), 140.1 (CH), 136.8 (Cq), 132.5 (CH), 129.1 (CH), 128.9 (2 CH), 126.5 (2 CH), 124.4 (CH), 124.2 (CH), 121.2 (Cq),

111.0 (CH), 95.0 (Cq), 90.9 (Cq), 26.7 (CH<sub>3</sub>), 15.2 (CH<sub>3</sub>). IR (neat): 1677, 1598, 1560, 1506, 1463, 1433, 1409, 1357, 1308, 1270, 1262, 1241, 1182, 1114, 1076, 1040, 1014, 959, 945, 860, 812, 751 cm<sup>-1</sup>. HRMS (ESI): m/z [M+H]<sup>+</sup> calcd for C<sub>19</sub>H<sub>17</sub>OS: 293.1000; found: 293.0992.

**(Z)-1-(4-(2-(4-Methoxystyryl)benzo[b]thiophen-3-yl)phenyl)ethanone (1al)**

yellow solid, mp 143.7 - 144.1 °C, yield 89%, 171.1 mg.

<sup>1</sup>H NMR (300 MHz, DMSO) δ = 8.11 (d, *J* = 8.1 Hz, 2H), 7.90 - 7.86 (m, 1H), 7.61 (d, *J* = 8.1 Hz, 2H), 7.54 - 7.50 (m, 1H), 7.39- 7.28 (m, 4H), 6.90 (d, *J* = 8.1 Hz, 2H), 6.72 (d, *J* = 12.0 Hz, 1H), 6.47 (d, *J* = 12.0 Hz, 1H), 3.77 (s, 3H), 2.64 (s, 3H), 1.38 (cyclohexane). <sup>13</sup>C NMR (75 MHz, DMSO) δ = 198.0 (Cq), 159.6 (Cq), 139.6 (Cq), 139.0 (Cq), 138.4 (Cq), 136.9 (Cq), 136.4 (Cq), 135.5 (Cq), 133.4 (CH), 130.8 (2 CH), 130.7 (2 CH), 129.0 (2 CH), 128.6 (Cq), 125.8 (CH), 125.3 (CH), 123.0 (CH), 122.7 (CH), 121.0 (CH), 114.3 (2 CH), 55.6 (CH<sub>3</sub>), 27.3 (CH<sub>3</sub>), 26.8 (cyclohexane). IR (neat): 1735, 1680, 1603, 1510, 1457, 1435, 1404, 1356, 1305, 1266, 1245, 1175, 1143, 1110, 1081, 1032, 1018, 951, 907, 875, 850, 819, 764, 728 cm<sup>-1</sup>. HRMS (ESI): m/z [M+H]<sup>+</sup> calcd for C<sub>25</sub>H<sub>21</sub>O<sub>2</sub>S: 385.1262; found: 385.1260.

**(Z)-1-(4-(2-(3-(4-Methoxyphenyl)benzo[b]thiophen-2-yl)vinyl)phenyl)ethanone (1am)**

yellow solid, mp 123.2 – 123.6 °C, yield 83%, 159.6 mg.

<sup>1</sup>H NMR (300 MHz, DMSO) δ = 7.94 (d, *J* = 8.1 Hz, 2H), 7.82 (d, *J* = 4.8 Hz, 1H), 7.54 - 7.51 (m, 3H), 7.41 - 7.34 (m, 4H), 7.11 (d, *J* = 8.1 Hz, 2H), 6.78 (d, *J* = 12.0 Hz, 1H), 6.65 (d, *J* = 12.0 Hz, 1H), 3.84 (s, 3H), 2.59 (s, 3H). <sup>13</sup>C NMR (75 MHz, DMSO) δ = 197.8 (Cq), 159.5 (Cq), 141.6 (Cq), 139.0 (Cq), 138.8 (Cq), 137.8 (Cq), 136.4 (Cq), 134.3 (Cq), 131.8 (2 CH), 131.2 (CH), 129.7 (2 CH), 128.8 (2 CH), 126.6 (Cq), 125.9 (CH), 125.1 (CH), 124.6 (CH), 123.1 (CH), 122.9 (CH), 114.7 (2 CH), 55.7 (CH<sub>3</sub>), 27.1 (CH<sub>3</sub>). IR (neat): 1675, 1612, 1595, 1559, 1525, 1503, 1491, 1410, 1357, 1288, 1269, 1246, 1181, 1153, 1108, 1060, 1033, 958, 941, 907, 863, 838, 813, 769, 728 cm<sup>-1</sup>. HRMS (ESI): m/z [M+H]<sup>+</sup> calcd for C<sub>25</sub>H<sub>21</sub>O<sub>2</sub>S: 385.1262; found: 385.1261.

**Procedure for the Synthesis of 1ca and 16**

In a round-bottomed flask, under an argon atmosphere, containing the chlorovinyl substrate (0.5 mmol) and Fe(acac)<sub>3</sub> (0.05 mmol) was added THF (6 mL). The reaction mixture was cooled to -30 °C and EtMgBr (0.75 mmol of typically 1 M solution in THF) was added dropwise (for the synthesis of **18** the quantity of EtMgBr was 1.5 mmol). The red colored solution turned dark brown to black (depending on the Grignard reagent quantity). The reaction mixture was stirred

until the disappearance of starting material as judged by TLC. A 1 M aq HCl solution (5.0 mL) was then added, and the two layers were separated. After extraction using Et<sub>2</sub>O (2 × 20 mL), the combined organic layers were washed three times with H<sub>2</sub>O, then dried over MgSO<sub>4</sub>, filtered, and concentrated under vacuum. The crude residue was then purified by silica gel column chromatography.

**(E)-2-(But-1-en-1-yl)-3-(4-methoxyphenyl) benzo[b]thiophene (1ca)**

yellow solid, mp 73.6 - 73.9 °C, yield 84 %, 123.7 mg.

<sup>1</sup>H NMR (300 MHz, CDCl<sub>3</sub>) δ = 7.80 (d, *J* = 6.9 Hz, 1H), 7.55 (d, *J* = 6.9 Hz, 1H), 7.40 - 7.29 (m, 4H), 7.08 (d, *J* = 8.4 Hz, 2H), 6.59 (d, *J* = 15.6 Hz, 1H), 6.33 - 6.23 (m, 1H), 3.93 (s, 3H), 2.29 - 2.19 (m, 2H), 1.10 (t, *J* = 7.5 Hz, 3H). <sup>13</sup>C NMR (75 MHz, CDCl<sub>3</sub>) δ = 159.1 (Cq), 140.9 (Cq), 138.6 (Cq), 137.8 (Cq), 135.7 (CH), 133.5 (Cq), 131.6 (2 CH), 127.4 (Cq), 124.7 (CH), 124.3 (CH), 122.9 (CH), 122.2 (2 CH), 114.1 (2 CH), 55.4 (CH<sub>3</sub>), 26.4 (CH<sub>2</sub>), 13.6 (CH<sub>3</sub>). IR (neat): 1751, 1682, 1610, 1529, 1499, 1458, 1434, 1381, 1356, 1287, 1246, 1206, 1181, 1132, 1107, 1083, 1034, 955, 910, 841, 812, 762, 732 cm<sup>-1</sup>. HRMS (ESI): *m/z* [M+H]<sup>+</sup> calcd for C<sub>19</sub>H<sub>19</sub>OS: 295.1157; found: 295.1160.

**2-(2-Ethylbut-1-en-1-yl)-3-(4-methoxyphenyl)benzo[b] thiophene (16)**

colorless oil, yield 74 %, 119.3 mg.

<sup>1</sup>H NMR (300 MHz, CDCl<sub>3</sub>) δ = 7.83 - 7.80 (m, 1H), 7.59 - 7.55 (m, 1H), 7.37 - 7.28 (m, 4H), 7.02 (d, *J* = 7.8 Hz, 2H), 6.27 (s, 1H), 3.89 (s, 3H), 2.50 (q, *J* = 7.5 Hz, 2H), 2.17 (q, *J* = 7.5 Hz, 2H), 1.12 (t, *J* = 7.5 Hz, 3H), 1.03 (t, *J* = 7.4 Hz, 3H). <sup>13</sup>C NMR (75 MHz, CDCl<sub>3</sub>) δ = 158.8 (Cq), 148.6 (Cq), 139.7 (Cq), 138.8 (Cq), 136.1 (Cq), 134.2 (Cq), 131.6 (2 CH), 127.9 (Cq), 124.1 (CH), 124.0 (CH), 122.7 (CH), 121.8 (CH), 116.3 (CH), 113.8 (2 CH), 55.3 (CH<sub>3</sub>), 30.4 (CH<sub>2</sub>), 25.0 (CH<sub>2</sub>), 12.9 (2 CH<sub>3</sub>). IR (neat): 2965, 1610, 1524, 1492, 1460, 1431, 1352, 1287, 1247, 1176, 1157, 1108, 1069, 1035, 936, 870, 830, 801, 764, 734 cm<sup>-1</sup>. HRMS (ESI): *m/z* [M+H]<sup>+</sup> calcd for C<sub>21</sub>H<sub>21</sub>OS: 321.1313; found: 321.1323.

**General procedure for the Synthesis of (E)-12, (E)-13**

To a solution of PdCl<sub>2</sub>(PhCN)<sub>2</sub> (9.6 mg, 0.025 mmol), (*E*)-chlorovinyl substrate (0.5 mmol), CuI (9.5 mg, 0.05 mmol) in 3 mL of piperidine was added the required 1-alkyne (0.6 mmol) in 1 mL of piperidine. The stirring was continued at 60 °C until TLC analysis indicated complete consumption of the chloroenyne. The reaction mixture was hydrolyzed with H<sub>2</sub>O (10 mL) and

HCl 0.5M (10 mL) and extracted with diethylether (3 x 10 mL). The organic layers were dried over MgSO<sub>4</sub> and the solvent was removed in vacuo. Purification by column chromatography afforded the expected (*E*)-enynes.

**(*E*)-3-(4-Methoxyphenyl)-2-(4-(2-(methylthio)phenyl)but-1-en-3-yn-1-yl)benzo[*b*]thiophene (12)**

brown oil, yield 91%, 187.7 mg.

<sup>1</sup>H NMR (300 MHz, CDCl<sub>3</sub>) δ = 7.83 (d, *J* = 8.1 Hz, 1H), 7.60 (d, *J* = 7.5 Hz, 1H), 7.44 - 7.26 (m, 6H), 7.21 - 7.08 (m, 5H), 6.43 (d, *J* = 15.9 Hz, 1H), 3.93 (s, 3H), 2.51 (s, 3H). <sup>13</sup>C NMR (75 MHz, CDCl<sub>3</sub>) δ = 159.5 (Cq), 141.6 (Cq), 140.5 (Cq), 138.4 (Cq), 137.3 (Cq), 136.9 (Cq), 134.1 (CH), 132.4 (CH), 131.7 (2 CH), 128.9 (CH), 126.7 (Cq), 125.8 (CH), 124.7 (CH), 124.4 (CH), 124.3 (CH), 123.6 (CH), 122.3 (CH), 121.5 (Cq), 114.3 (2 CH), 109.7 (CH), 95.4 (Cq), 90.8 (Cq), 55.5 (CH<sub>3</sub>), 15.2 (CH<sub>3</sub>). IR (neat): 1680, 1609, 1598, 1576, 1525, 1494, 1462, 1433, 1357, 1320, 1287, 1246, 1209, 1178, 1160, 1130, 1109, 1079, 1035, 936, 908, 844, 814, 765, 751 cm<sup>-1</sup>. HRMS (APCI): *m/z* [M+H]<sup>+</sup> calcd for C<sub>26</sub>H<sub>21</sub>OS<sub>2</sub>: 413.1028; found: 413.1017.

**(*E*)-*N*-(2-(4-(3-(4-Methoxyphenyl)benzo[*b*]thiophen-2-yl)but-3-en-1-yn-1-yl)phenyl)-*N*,4-dimethyl benzenesulfonamide (13)**

yellow solid, mp 80.9 - 81.2 °C, yield 75 %, 206.1 mg.

<sup>1</sup>H NMR (300 MHz, CDCl<sub>3</sub>) δ = 7.82 (d, *J* = 8.1 Hz, 1H), 7.61 - 7.57 (m, 3H), 7.42 - 7.27 (m, 8H), 7.17 - 7.08 (m, 4H), 6.89 (d, *J* = 15.9 Hz, 1H), 5.91 (d, *J* = 15.9 Hz, 1H), 3.92 (s, 3H), 3.30 (s, 3H), 2.30 (s, 3H). <sup>13</sup>C NMR (75 MHz, CDCl<sub>3</sub>) δ = 159.7 (Cq), 143.5 (Cq), 142.2 (Cq), 140.4 (Cq), 138.3 (Cq), 137.4 (Cq), 136.5 (Cq), 136.2 (Cq), 133.9 (CH), 133.5 (CH), 131.6 (2 CH), 131.4 (CH), 129.6 (2 CH), 129.1 (CH), 128.0 (CH), 127.8 (2 CH), 126.5 (Cq), 126.0 (CH), 124.8 (CH), 123.7 (CH), 122.6 (Cq), 122.4 (CH), 114.3 (2 CH), 109.3 (CH), 93.8 (Cq), 90.0 (Cq), 55.5 (CH<sub>3</sub>), 38.1 (CH<sub>3</sub>), 21.6 (CH<sub>3</sub>). IR (neat): 1610, 1525, 1495, 1482, 1443, 1348, 1288, 1248, 1210, 1176, 1155, 1109, 1090, 1070, 1036, 938, 910, 891, 867, 845, 815, 765, 732, 710, 696, 676, 650 cm<sup>-1</sup>. HRMS (ESI): *m/z* [M+H]<sup>+</sup> calcd for C<sub>33</sub>H<sub>28</sub>NO<sub>3</sub>S<sub>2</sub>: 550.1511; found: 550.1503.

**Procedure for the Synthesis of 14**

Toluene (3 mL) was added to a mixture of AuBr<sub>3</sub> (21.8 mg, 0.05 mmol) and **13** (274.9 mg, 0.5 mmol) at rt and the mixture was warmed immediately to 80 °C. After complete consumption of the starting material, as monitored by TLC, the reaction mixture was cooled to rt and filtered



through a short SiO<sub>2</sub> pad, and the filtrate was concentrated. The residue was purified by silica-gel column chromatography.

**(E)-2-(2-(3-(4-Methoxyphenyl)benzo[b]thiophen-2-yl)vinyl)-1-methyl-3-tosyl-1H-indole (14)**

brown solid, mp 169.5 - 169.7 °C, yield 90 %, 247.4 mg.

<sup>1</sup>H NMR (300 MHz, CDCl<sub>3</sub>) δ = 8.29 - 8.25 (m, 1H), 7.92 - 7.84 (m, 3H), 7.74 (d, *J* = 16.5 Hz, 1H), 7.65 (d, *J* = 7.8 Hz, 1H), 7.46 - 7.26 (m, 8H), 7.20 - 7.15 (m, 2H), 7.11 - 7.05 (m, 2H), 3.91 (s, 3H), 3.73 (s, 3H), 2.33 (s, 3H). <sup>13</sup>C NMR (75 MHz, CDCl<sub>3</sub>) δ = 159.6 (Cq), 143.1 (Cq), 141.3 (Cq), 140.4 (Cq), 140.3 (Cq), 138.9 (Cq), 138.3 (Cq), 137.7 (Cq), 137.1 (Cq), 131.6 (2 CH), 130.7 (CH), 129.6 (2 CH), 126.6 (Cq), 126.5 (2 CH), 126.1 (CH), 125.2 (Cq), 124.9 (CH), 124.1 (CH), 123.7 (CH), 122.8 (CH), 122.6 (CH), 120.5 (CH), 117.1 (CH), 114.3 (2 CH), 113.5 (Cq), 110.0 (CH), 55.5 (CH<sub>3</sub>), 32.4 (CH<sub>3</sub>), 21.6 (CH<sub>3</sub>). IR (neat): 2957, 1732, 1609, 1531, 1505, 1458, 1437, 1393, 1317, 1287, 1249, 1213, 1179, 1159, 1141, 1109, 1082, 1033, 1017, 976, 909, 843, 811, 765, 737, 724, 705 cm<sup>-1</sup>. HRMS (ESI): *m/z* [M+H]<sup>+</sup> calcd for C<sub>33</sub>H<sub>28</sub>NO<sub>3</sub>S<sub>2</sub>: 550.1511; found: 550.1503.

**References**

- (1) D. C. Neckers and F. L. Wagenaar, *J. Org. Chem.*, 1983, **48**, 1725-1732.

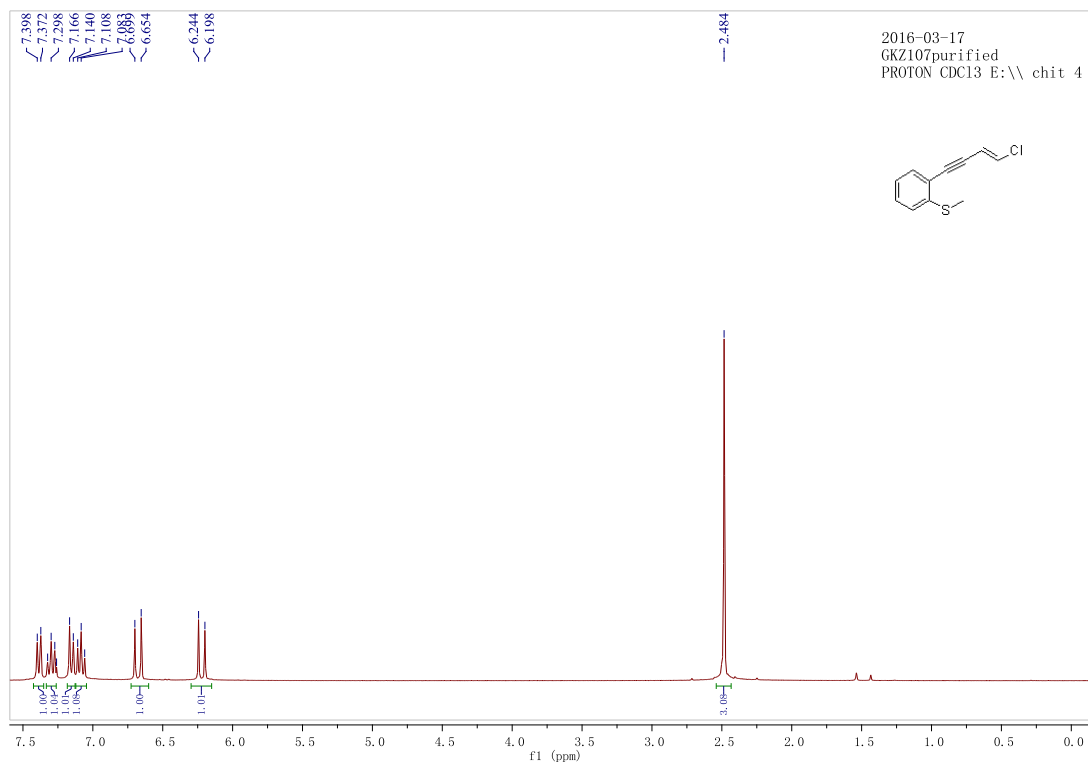

**Fig. 1**  $^1\text{H}$  NMR of (*E*)-(2-(4-chlorobut-3-en-1-yn-1-yl)phenyl)(methyl)sulfane **5a**

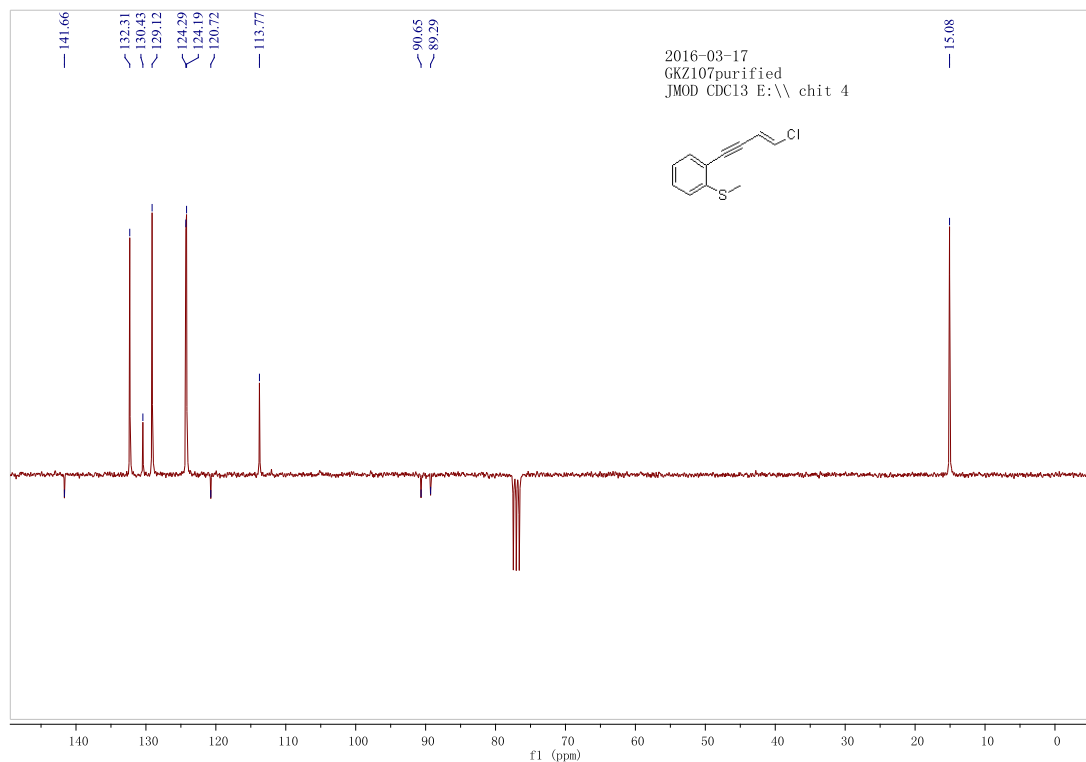

**Fig. 2**  $^{13}\text{C}$  NMR of (*E*)-(2-(4-chlorobut-3-en-1-yn-1-yl)phenyl)(methyl)sulfane **5a**

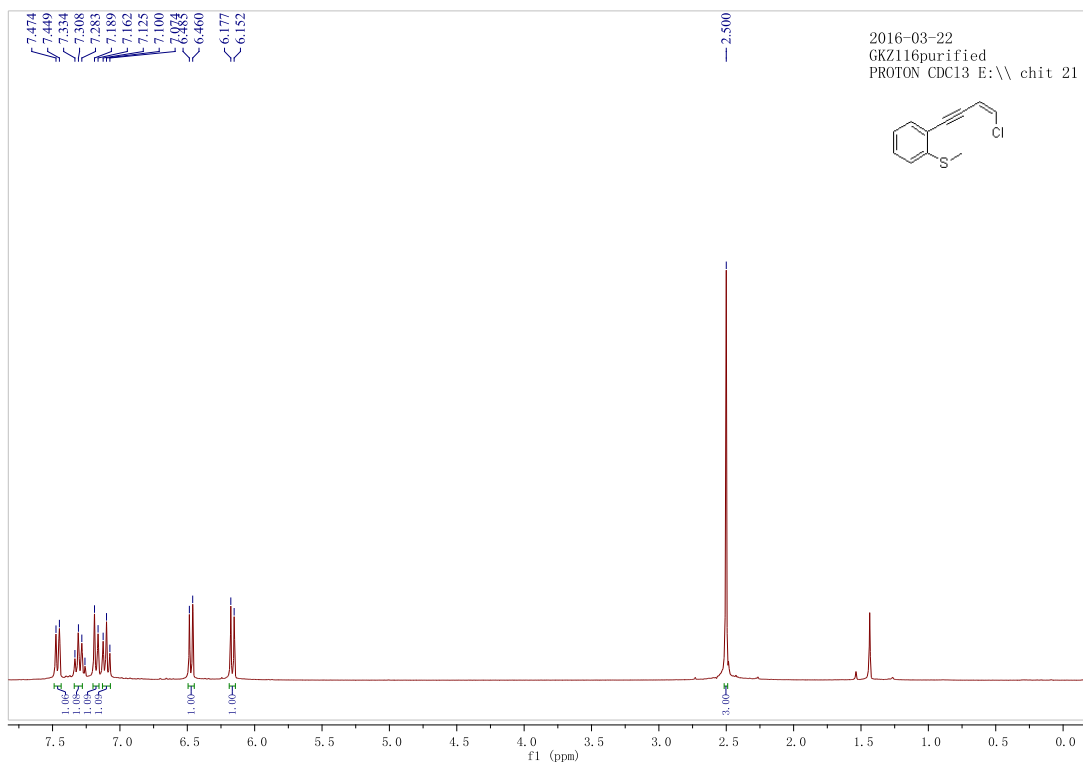

**Fig. 3**  $^1\text{H}$  NMR of (Z)-(2-(4-chlorobut-3-en-1-yn-1-yl)phenyl)(methyl)sulfane **5a**

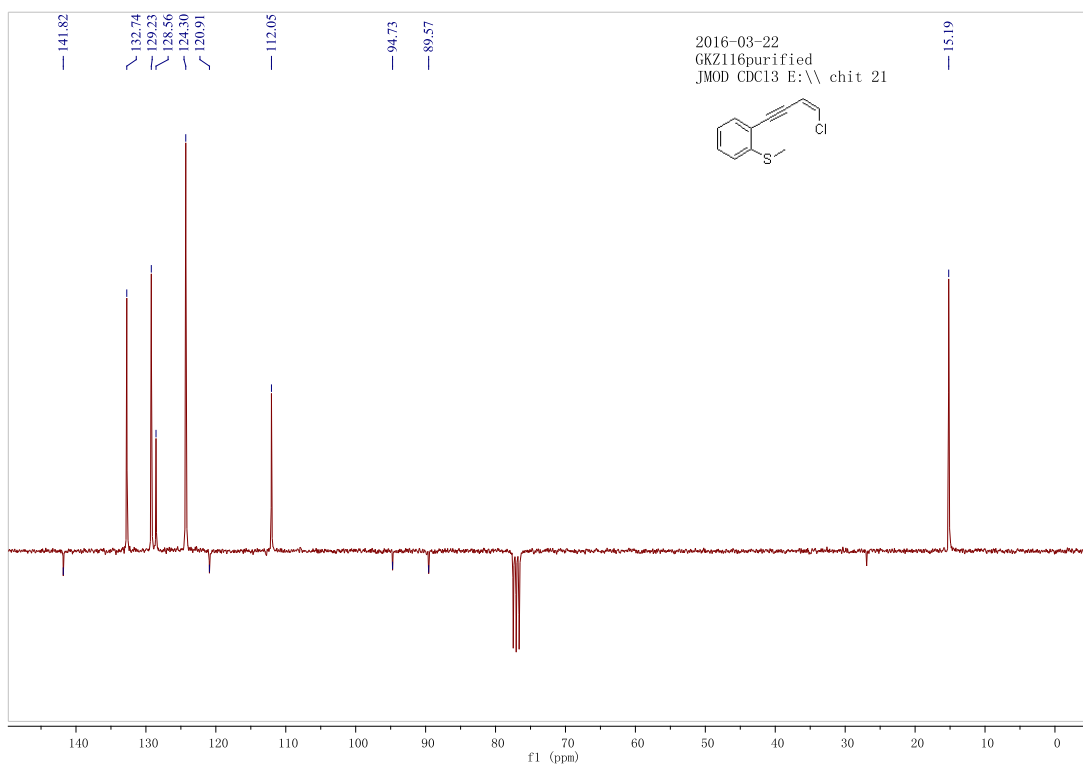

**Fig. 4**  $^{13}\text{C}$  NMR of (Z)-(2-(4-chlorobut-3-en-1-yn-1-yl)phenyl)(methyl)sulfane **5a**

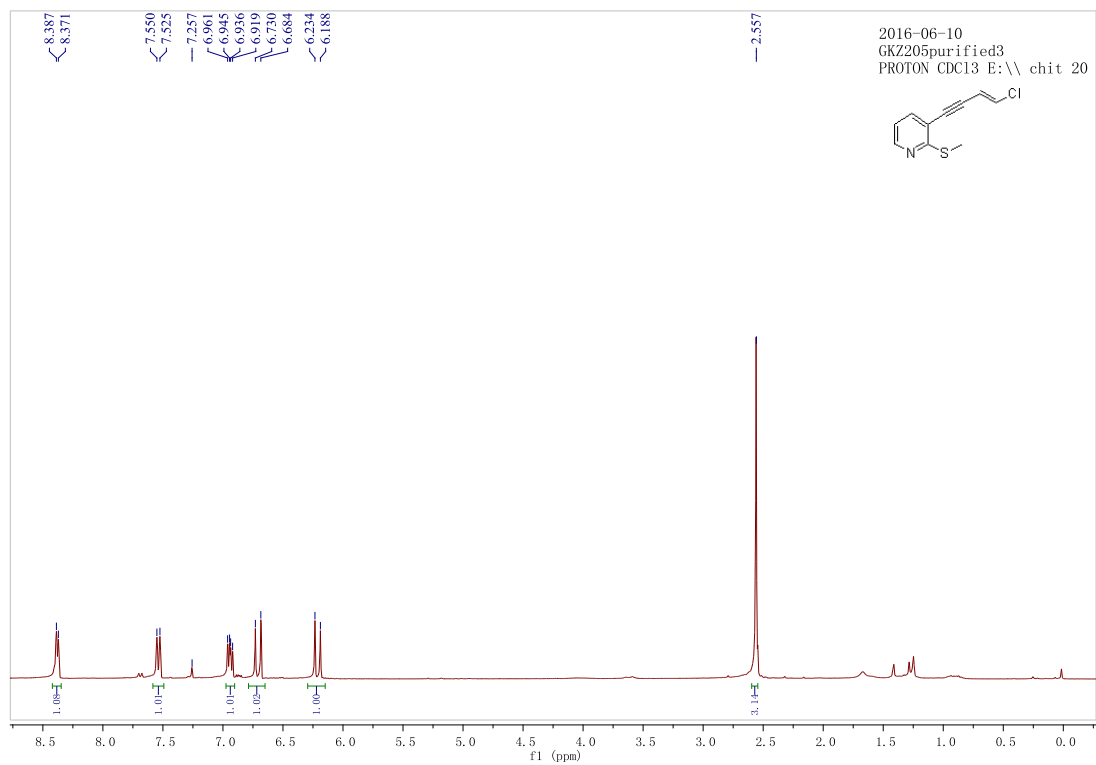

**Fig. 5**  $^1\text{H}$  NMR of (*E*)-3-(4-chlorobut-3-en-1-yn-1-yl)-2-(methylthio)pyridine **5b**

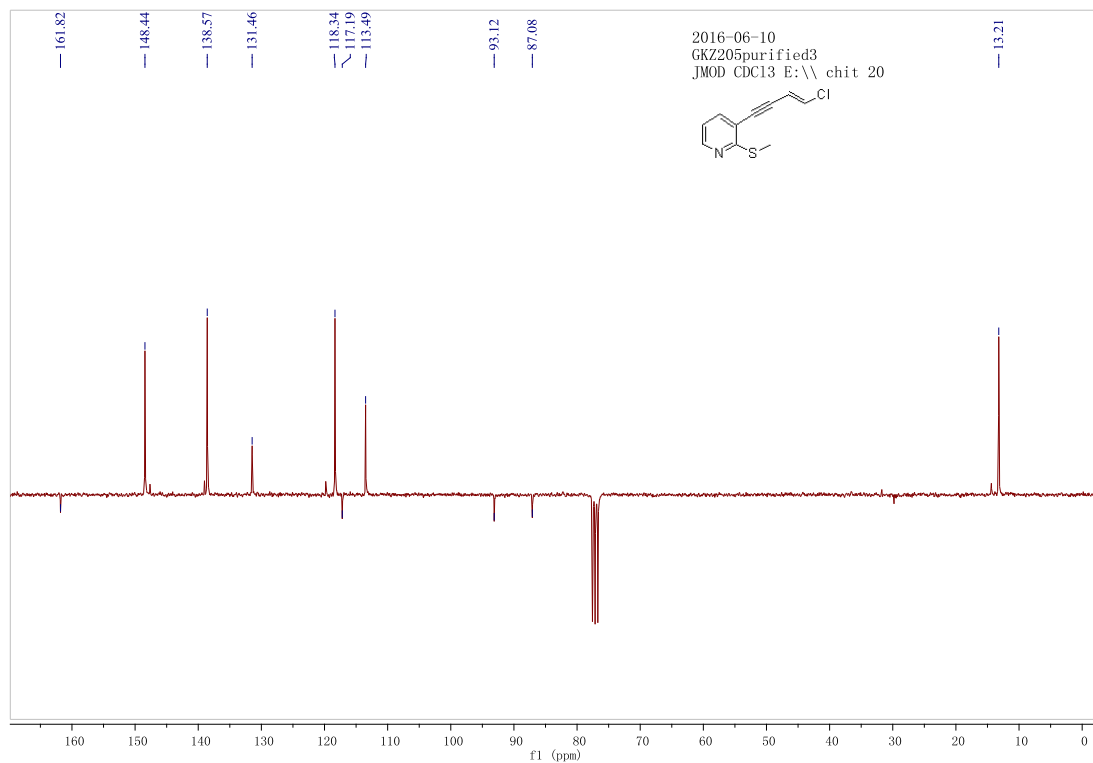

**Fig. 6**  $^{13}\text{C}$  NMR of (*E*)-3-(4-chlorobut-3-en-1-yn-1-yl)-2-(methylthio)pyridine **5b**

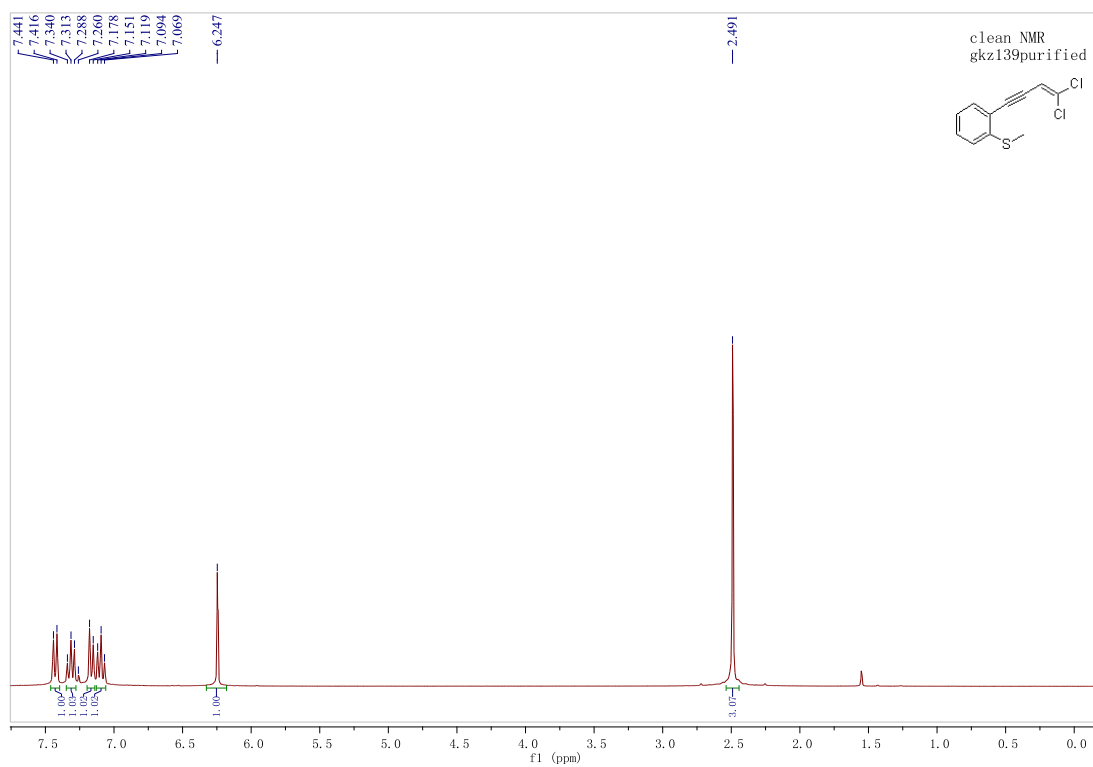

**Fig. 7**  $^1\text{H}$  NMR of (2-(4,4-dichlorobut-3-en-1-yn-1-yl)phenyl)(methyl)sulfane **5c**

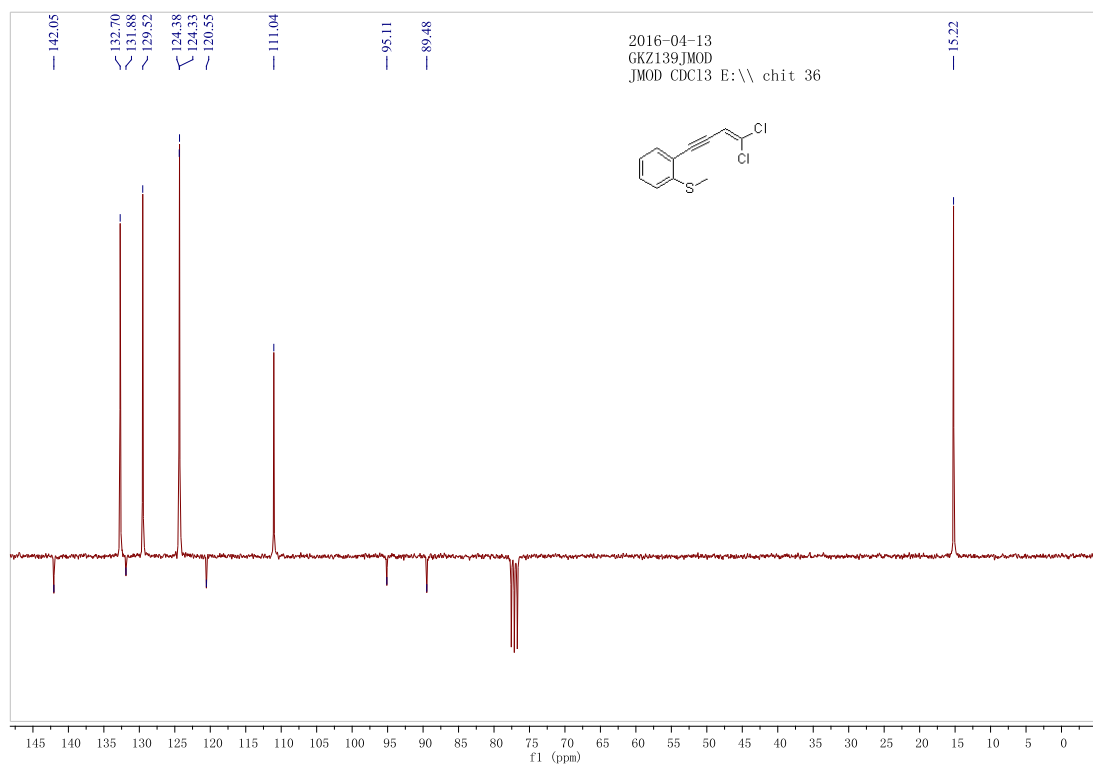

**Fig. 8**  $^{13}\text{C}$  NMR of (2-(4,4-dichlorobut-3-en-1-yn-1-yl)phenyl)(methyl)sulfane **5c**

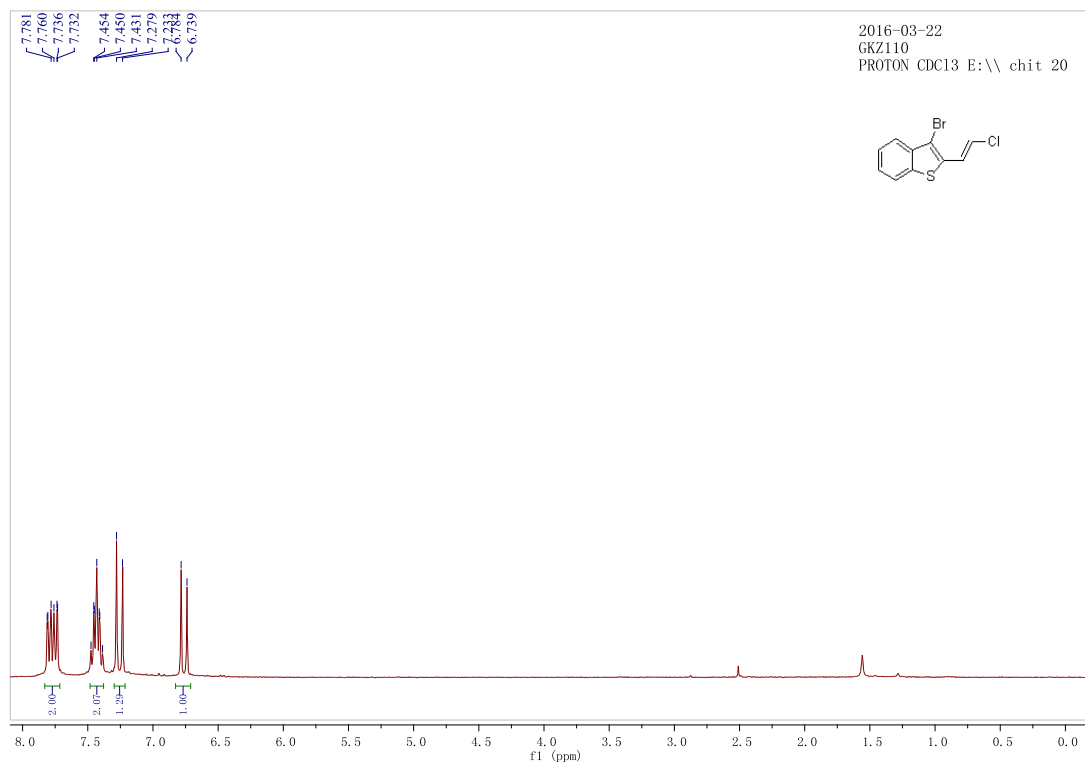

**Fig. 9**  $^1\text{H}$  NMR of (*E*)-3-bromo-2-(2-chlorovinyl)benzo[b]thiophene **6a**

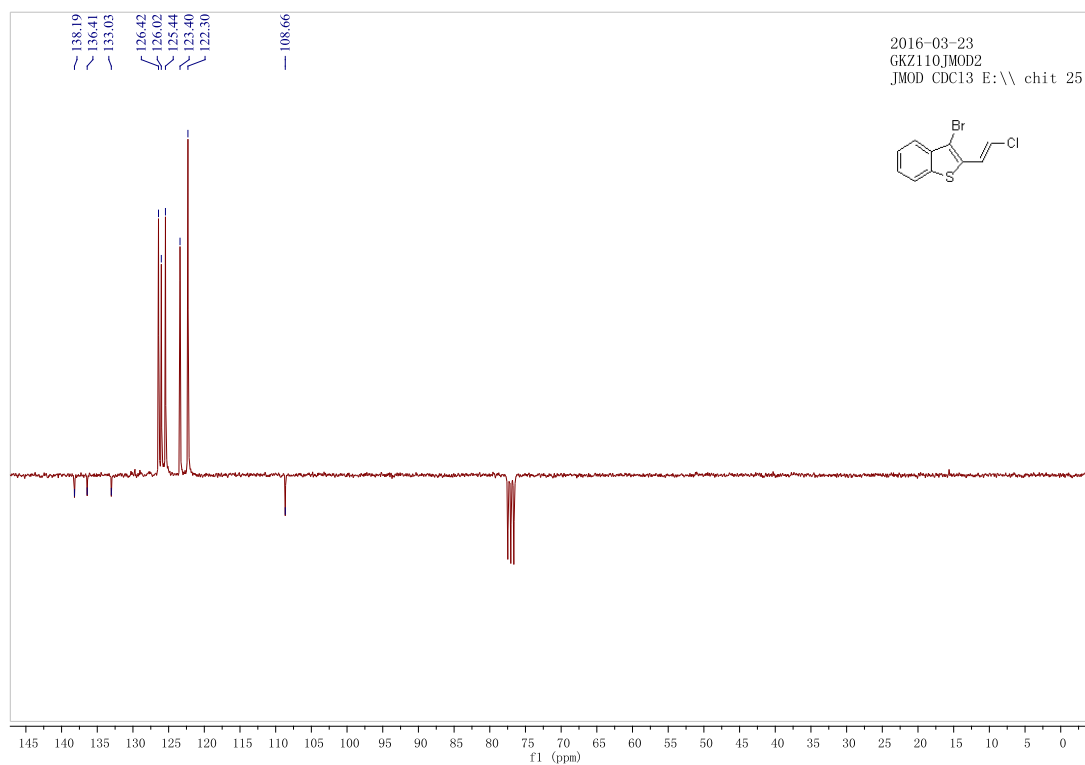

**Fig. 10**  $^{13}\text{C}$  NMR of (*E*)-3-bromo-2-(2-chlorovinyl)benzo[b]thiophene **6a**

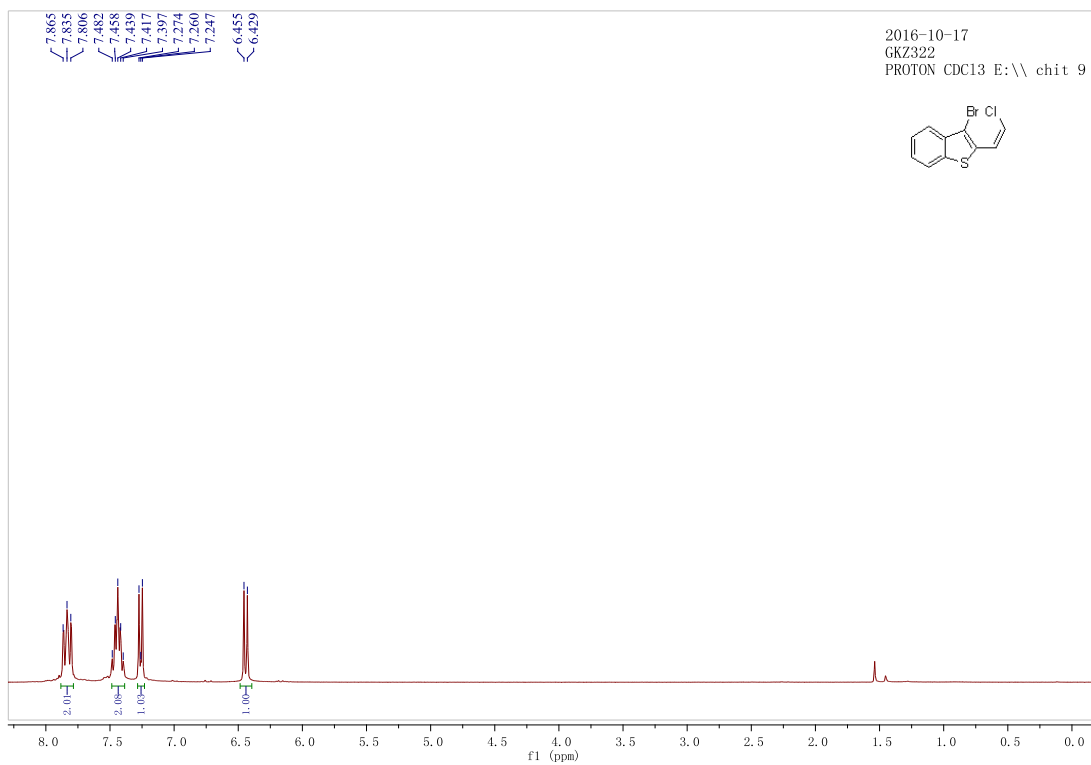

Fig. 11  $^1\text{H}$  NMR of (Z)-3-bromo-2-(2-chlorovinyl)benzo[b]thiophene **6a**

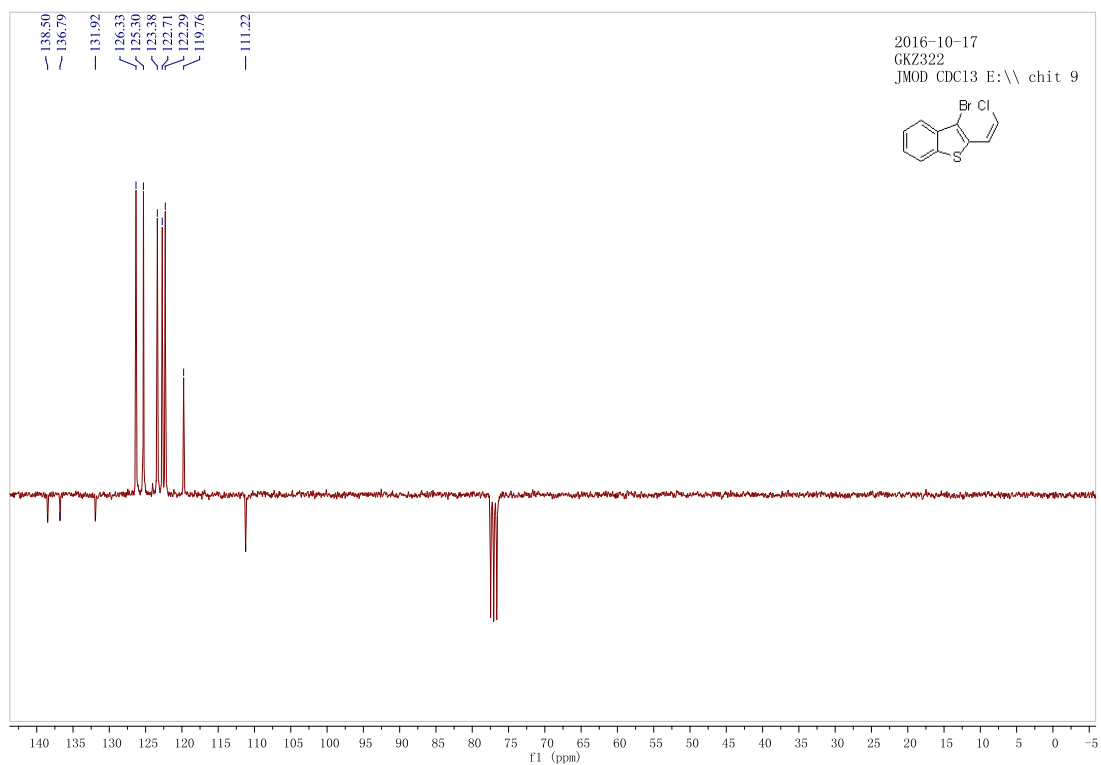

Fig. 12  $^{13}\text{C}$  NMR of (Z)-3-bromo-2-(2-chlorovinyl)benzo[b]thiophene **6a**

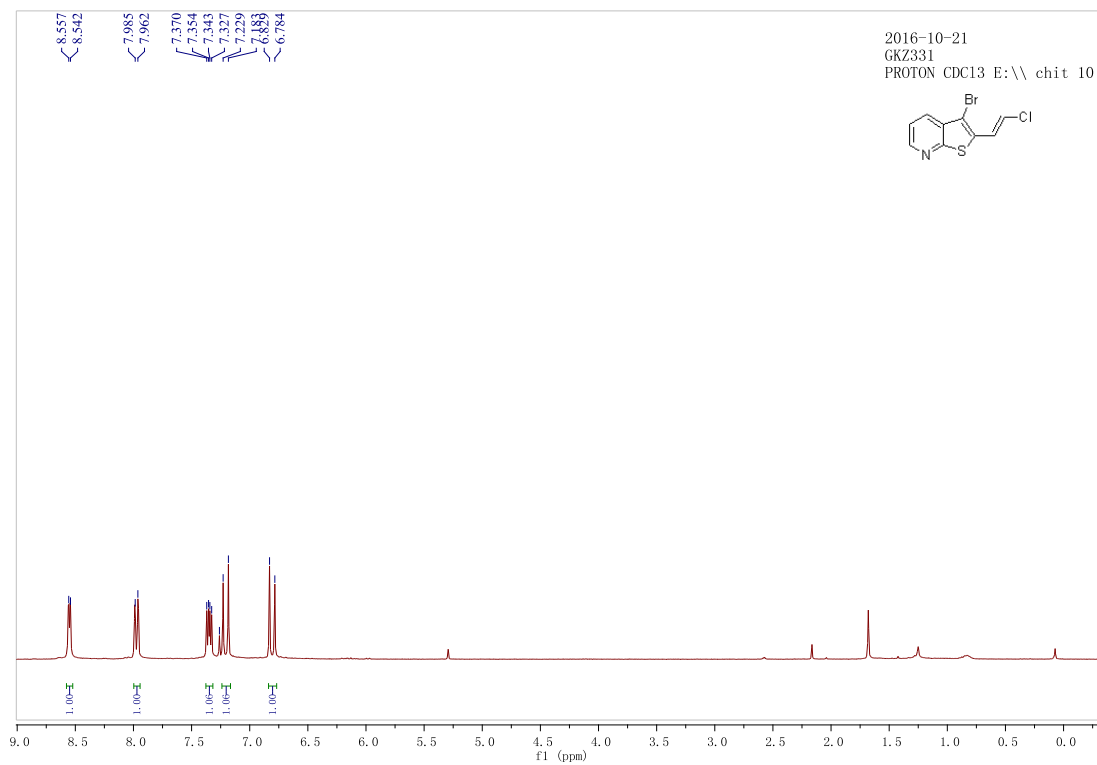

**Fig. 13**  $^1\text{H}$  NMR of (*E*)-3-bromo-2-(2-chlorovinyl)thieno[2,3-b]pyridine **6b**

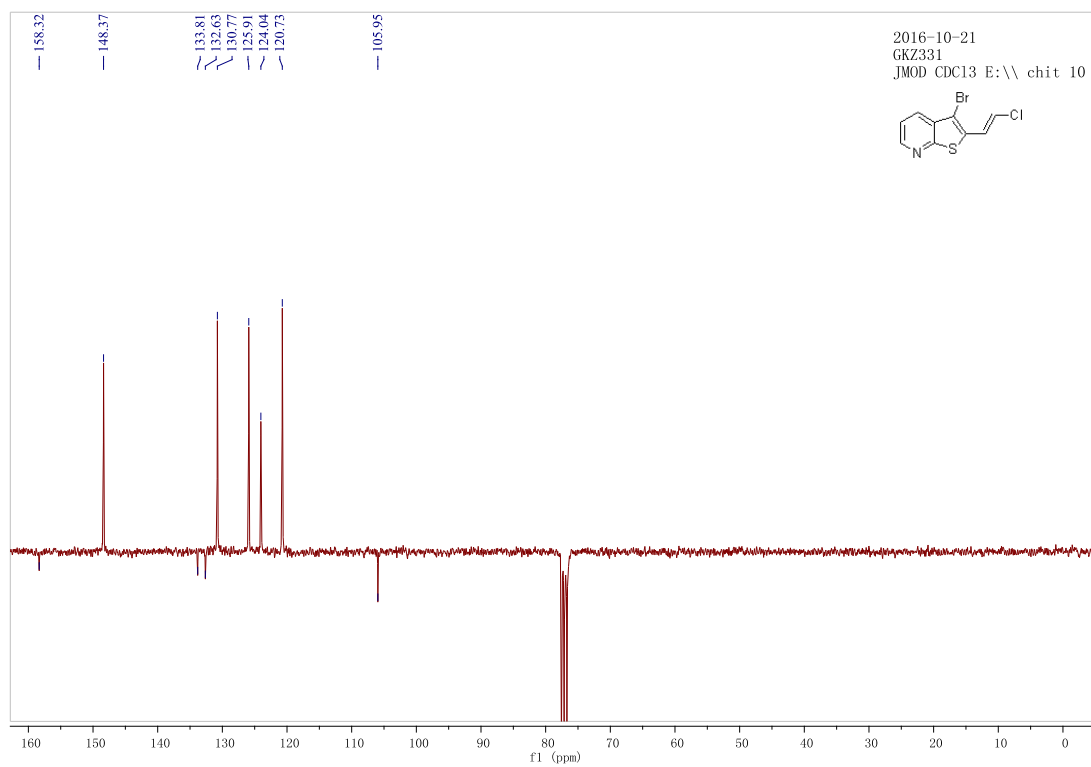

**Fig. 14**  $^{13}\text{C}$  NMR of (*E*)-3-bromo-2-(2-chlorovinyl)thieno[2,3-b]pyridine **6b**



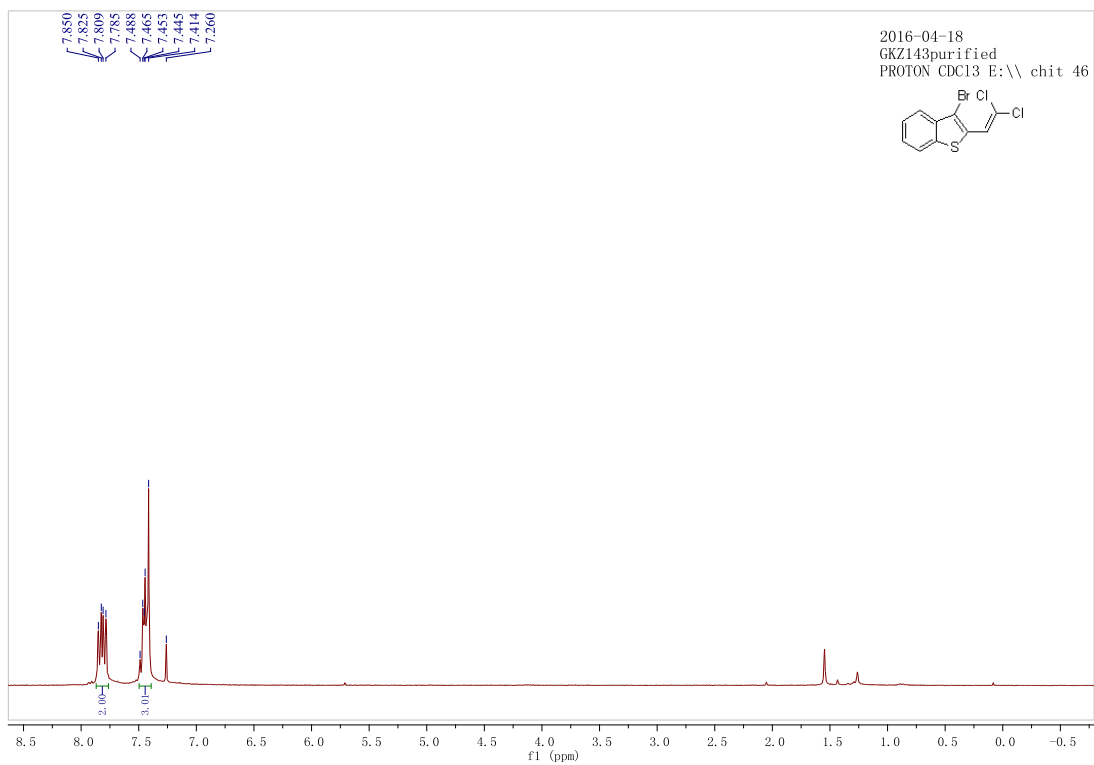

**Fig. 15**  $^1\text{H}$  NMR of 3-bromo-2-(2,2-dichlorovinyl)benzo[b]thiophene **6c**

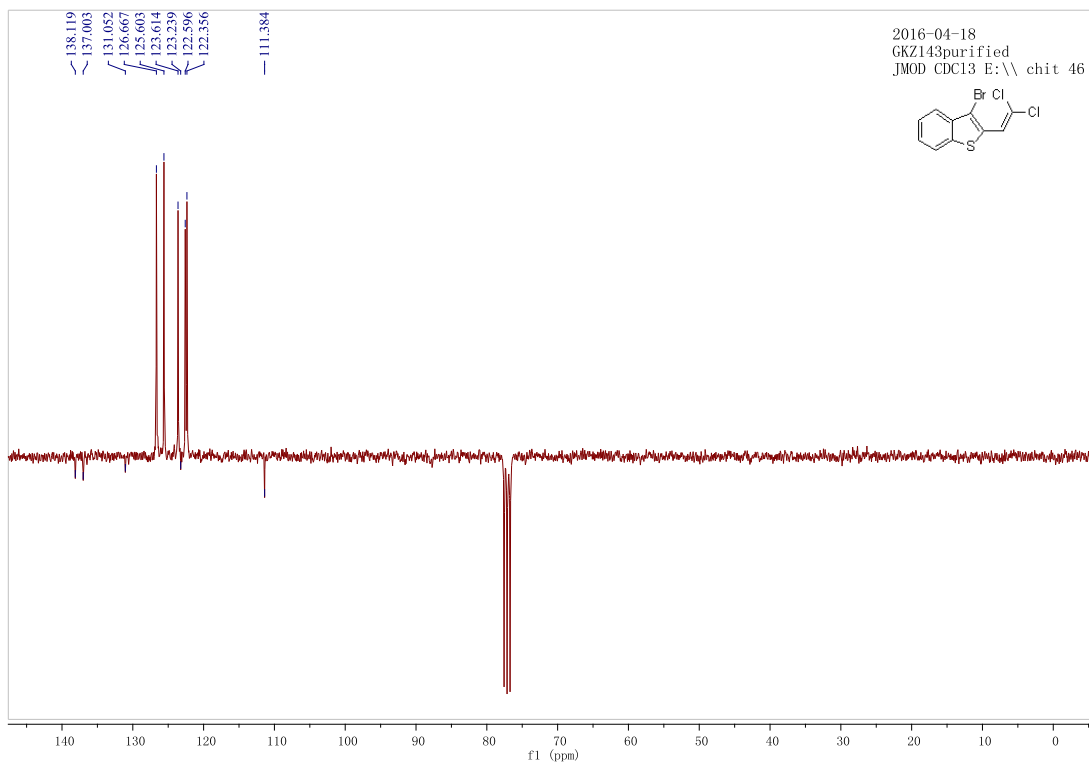

**Fig. 16**  $^{13}\text{C}$  NMR of 3-bromo-2-(2,2-dichlorovinyl)benzo[b]thiophene **6c**

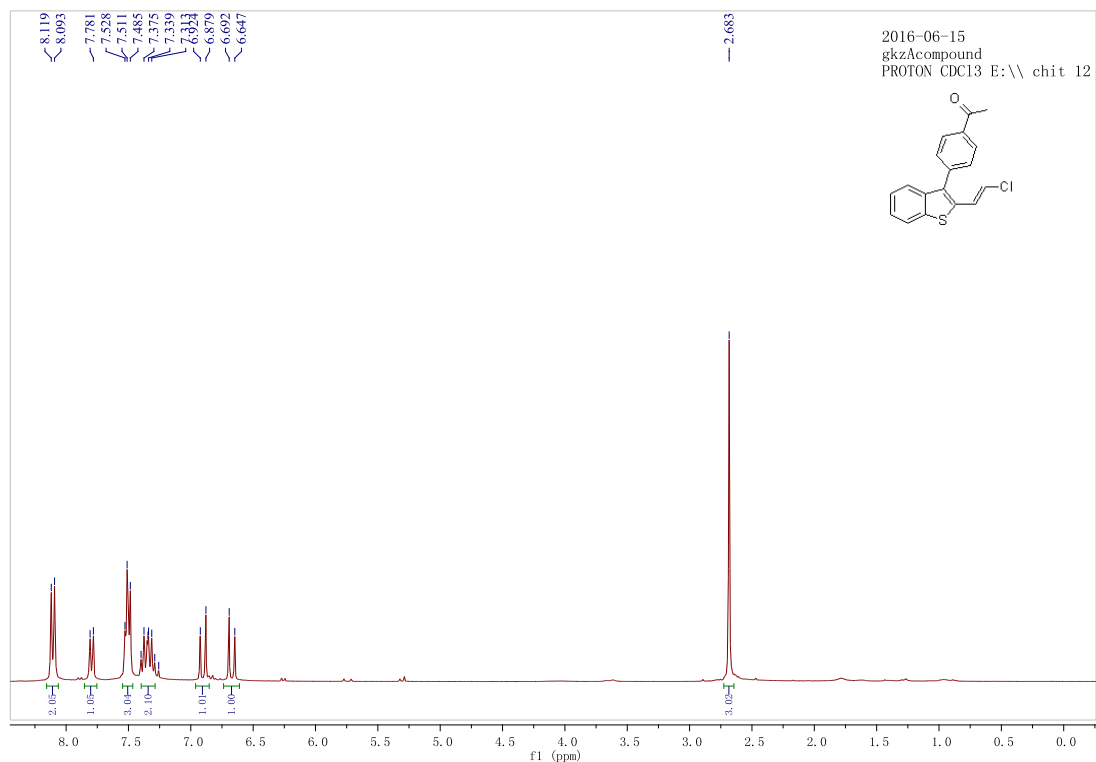

**Fig. 17**  $^1\text{H}$  NMR of (*E*)-1-(4-(2-(2-chlorovinyl)benzo[b]thiophen-3-yl)phenyl)ethanone **8a**

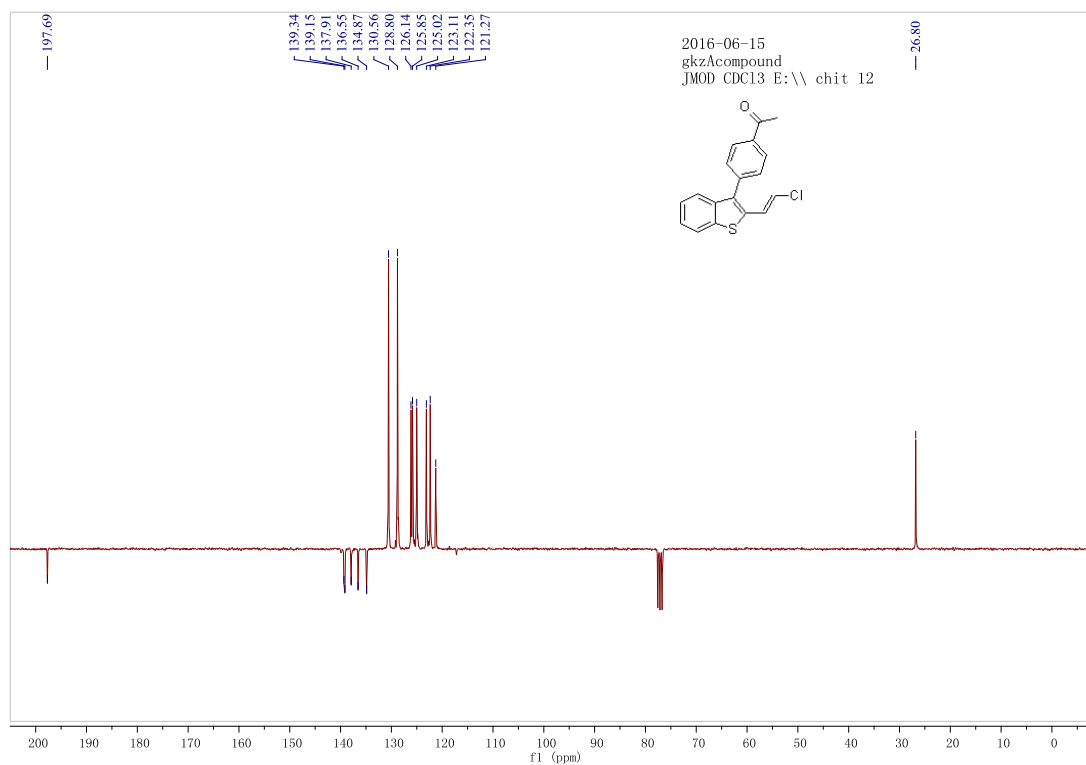

**Fig. 18**  $^{13}\text{C}$  NMR of (*E*)-1-(4-(2-(2-chlorovinyl)benzo[b]thiophen-3-yl)phenyl)ethanone **8a**

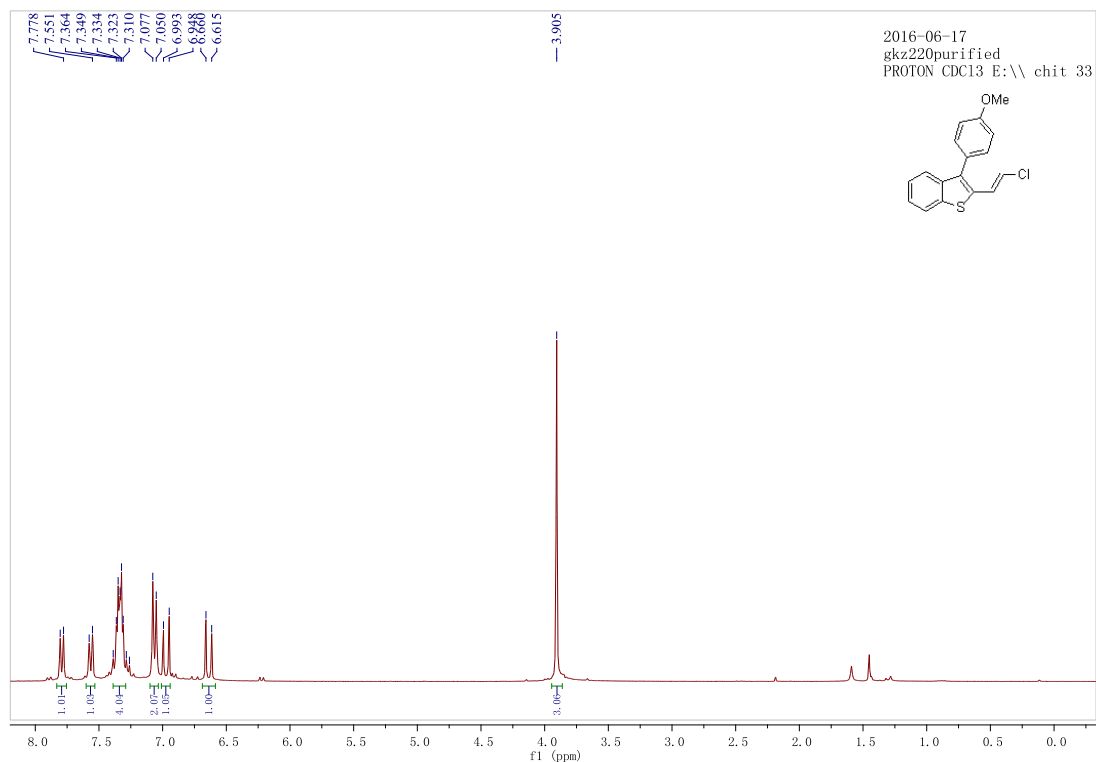

**Fig. 19**  $^1\text{H}$  NMR of (*E*)-2-(2-chlorovinyl)-3-(4-methoxyphenyl)benzo[*b*]thiophene **8b**

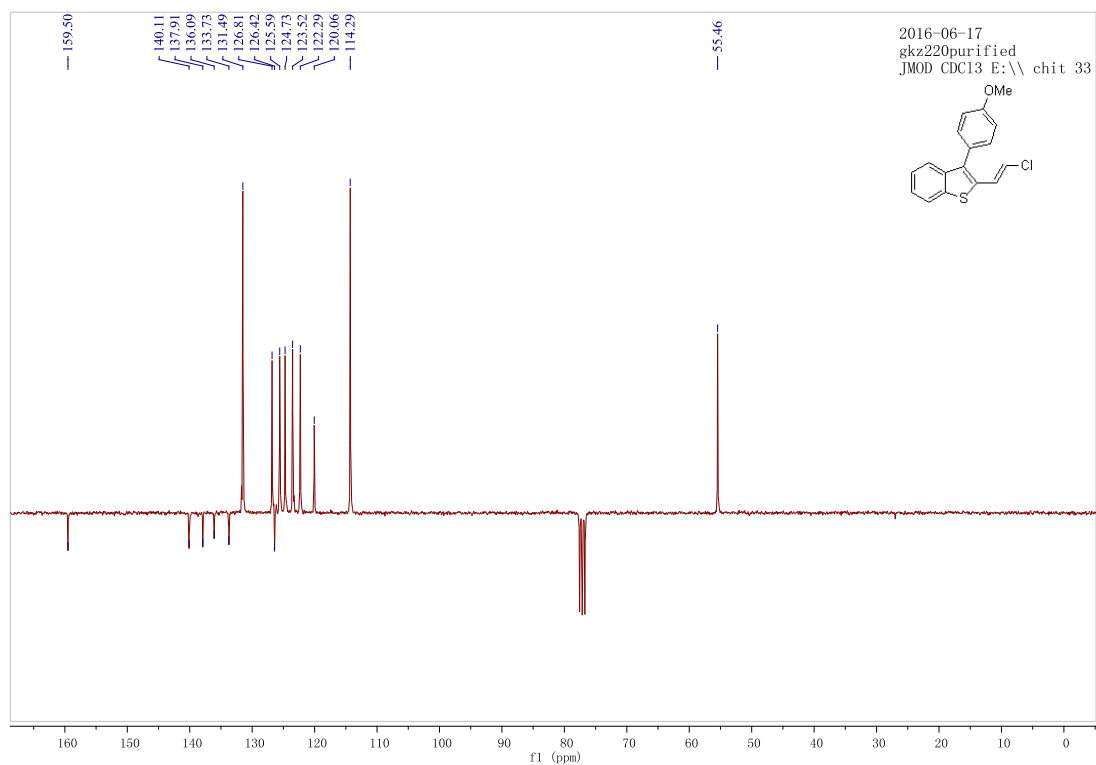

**Fig. 20**  $^{13}\text{C}$  NMR of (*E*)-2-(2-chlorovinyl)-3-(4-methoxyphenyl)benzo[*b*]thiophene **8b**

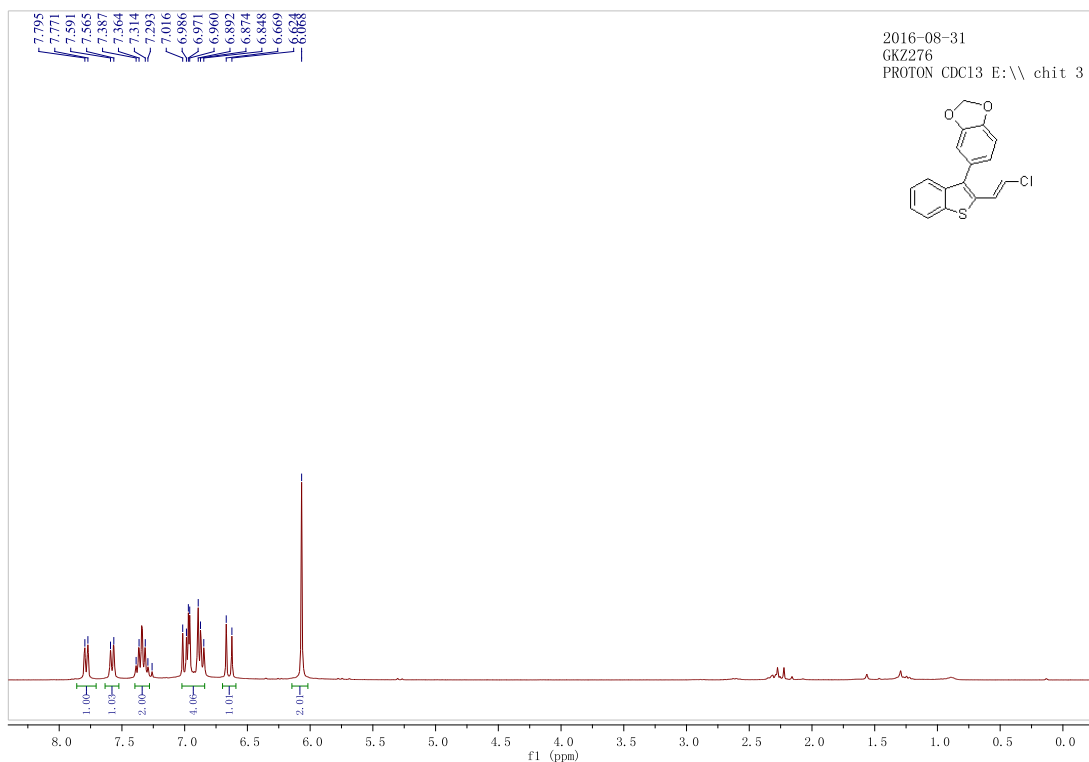

**Fig. 21**  $^1\text{H}$  NMR of (*E*)-5-(2-(2-chlorovinyl)benzo[b]thiophen-3-yl)benzo[d][1,3]dioxole **8c**

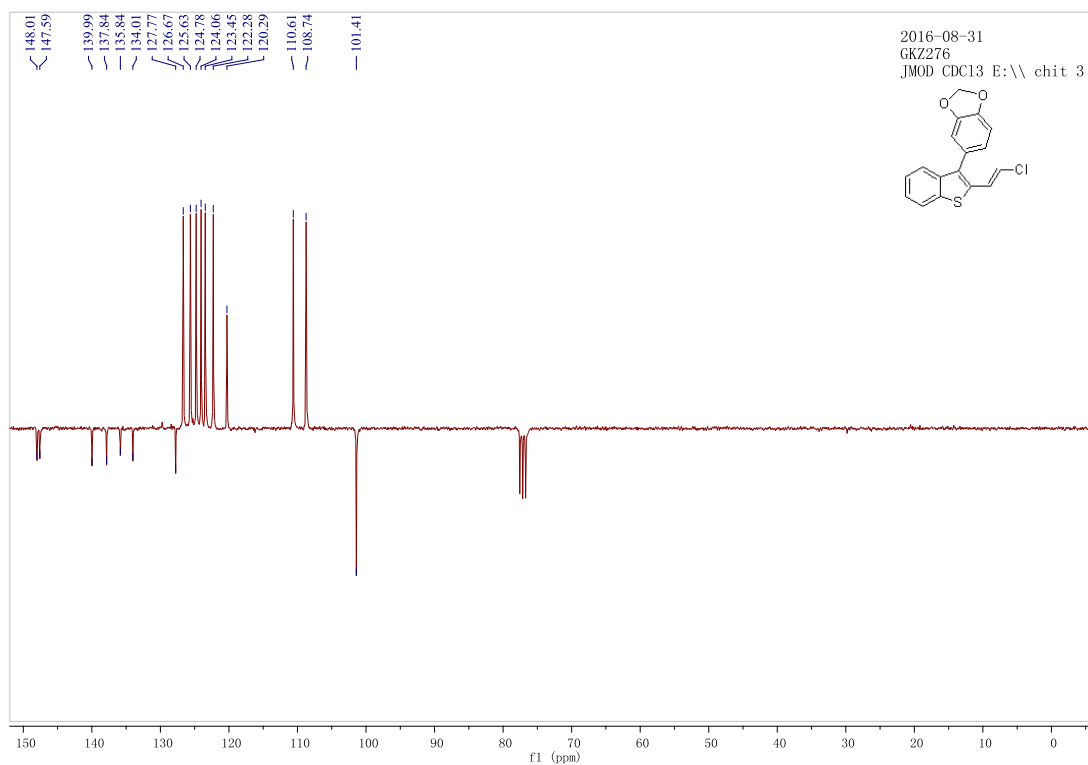

**Fig. 22**  $^{13}\text{C}$  NMR of (*E*)-5-(2-(2-chlorovinyl)benzo[b]thiophen-3-yl)benzo[d][1,3]dioxole **8c**

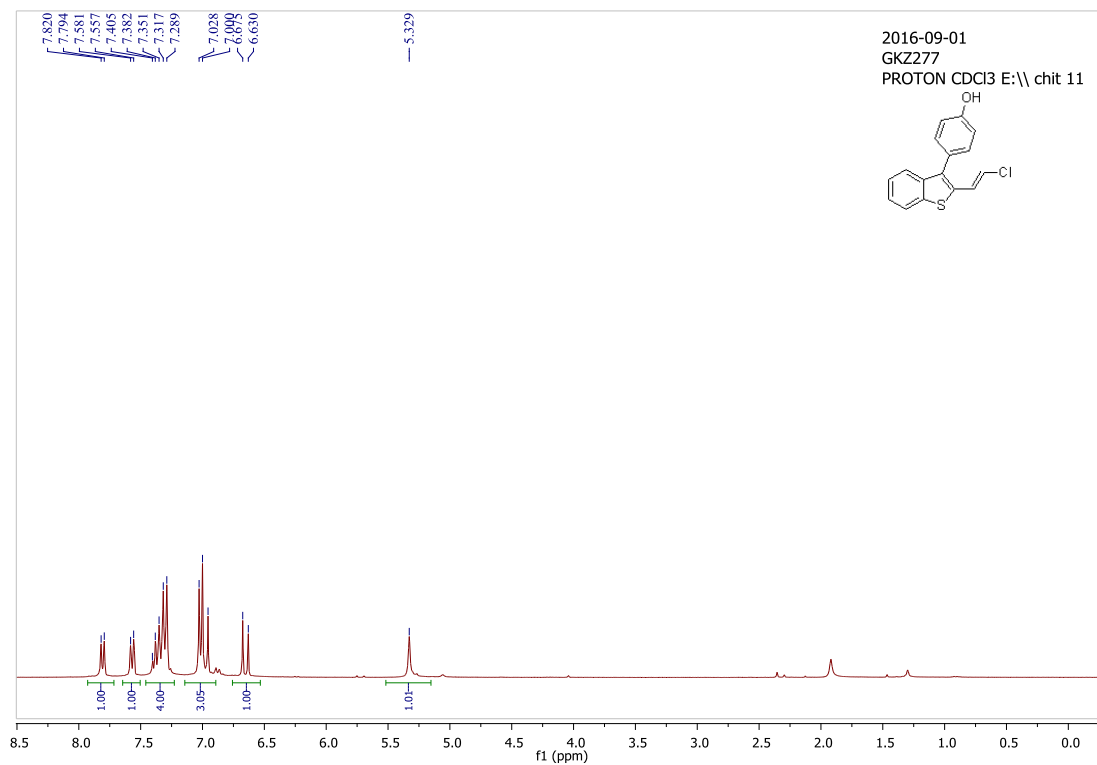

**Fig. 23**  $^1\text{H}$  NMR of (*E*)-4-(2-(2-chlorovinyl)benzo[b]thiophen-3-yl)phenol **8d**

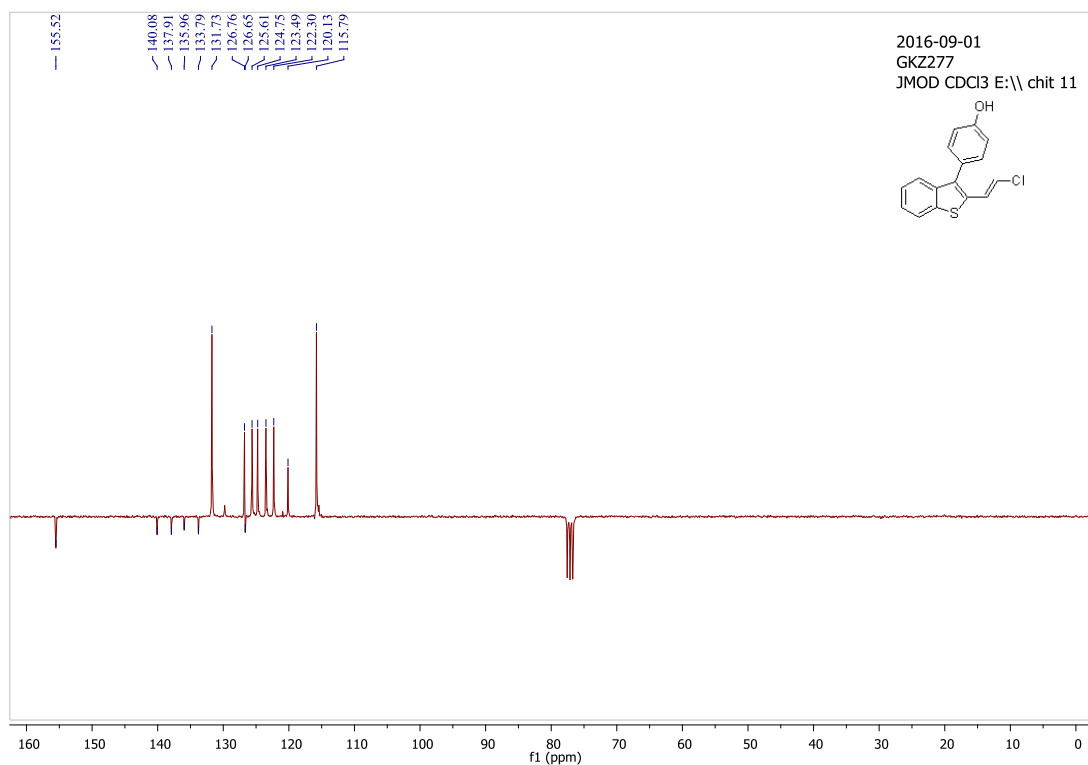

**Fig. 24**  $^{13}\text{C}$  NMR of (*E*)-4-(2-(2-chlorovinyl)benzo[b]thiophen-3-yl)phenol **8d**

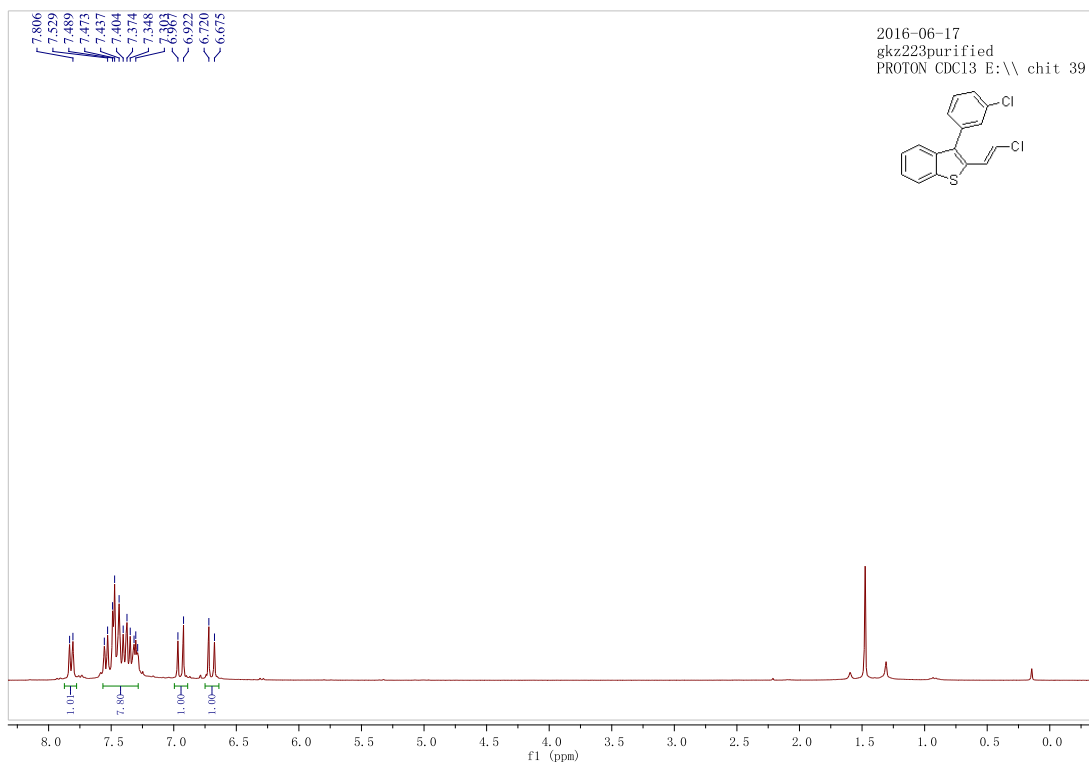

**Fig. 25**  $^1\text{H}$  NMR of (*E*)-3-(3-chlorophenyl)-2-(2-chlorovinyl)benzo[b]thiophene **8e**

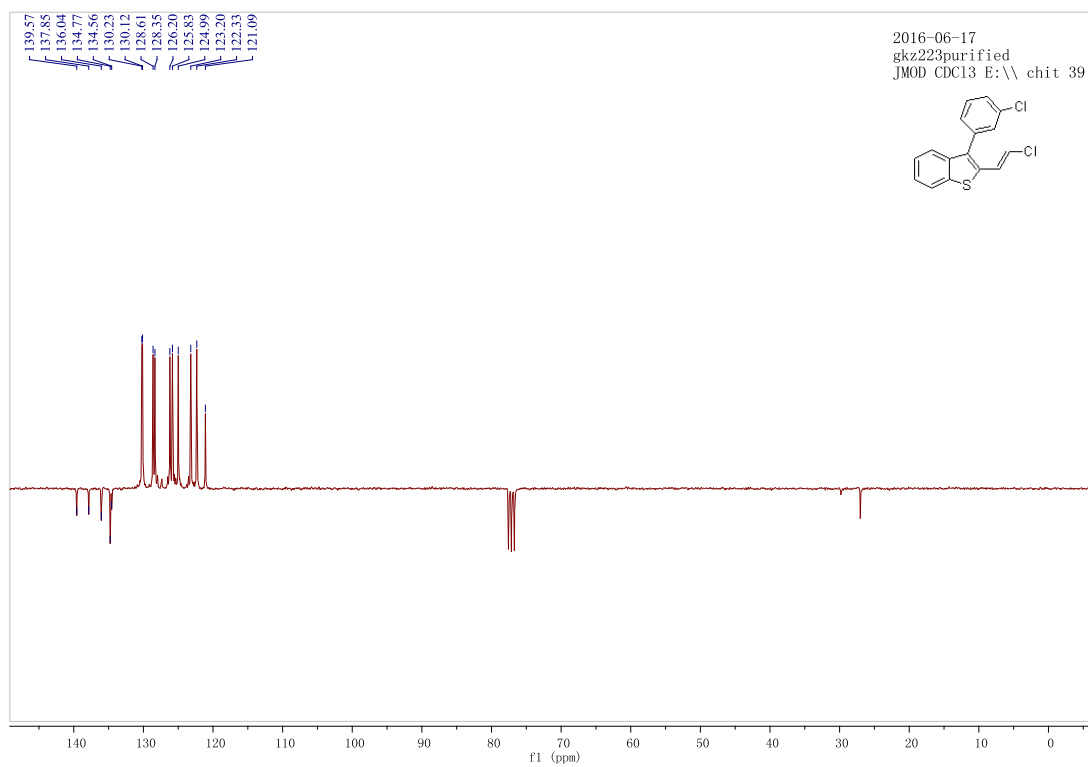

**Fig. 26**  $^{13}\text{C}$  NMR of (*E*)-3-(3-chlorophenyl)-2-(2-chlorovinyl)benzo[b]thiophene **8e**

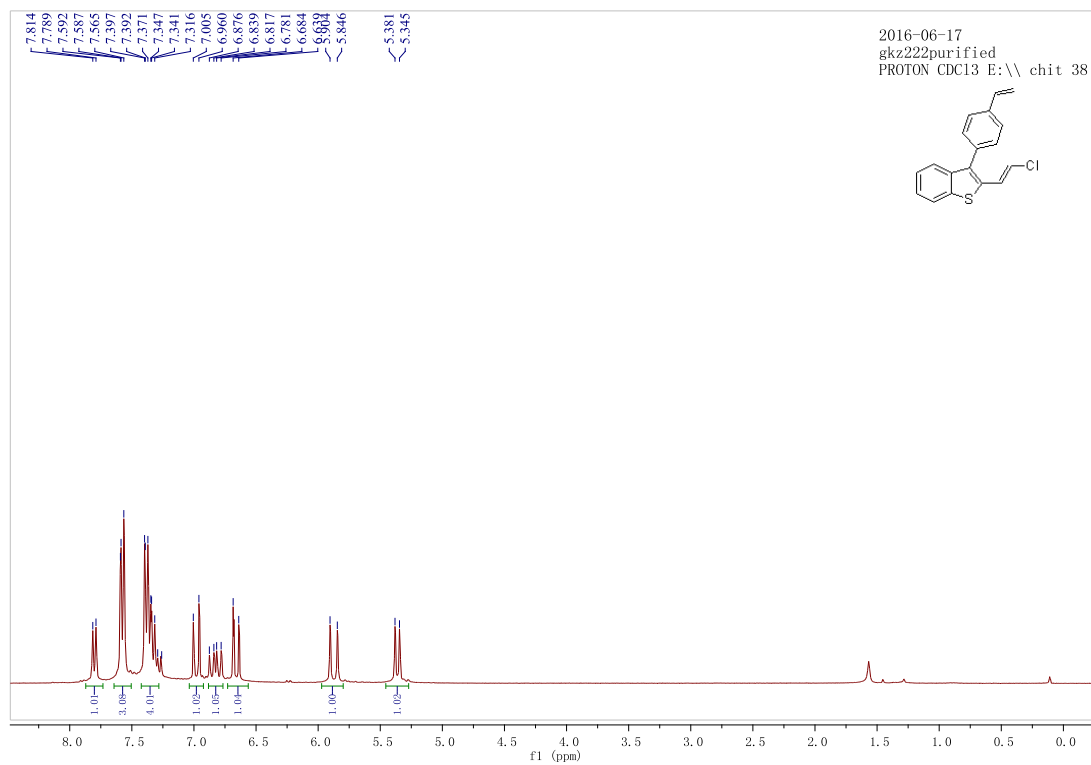

**Fig. 27**  $^1\text{H}$  NMR of (*E*)-2-(2-chlorovinyl)-3-(4-vinylphenyl)benzo[*b*]thiophene **8f**

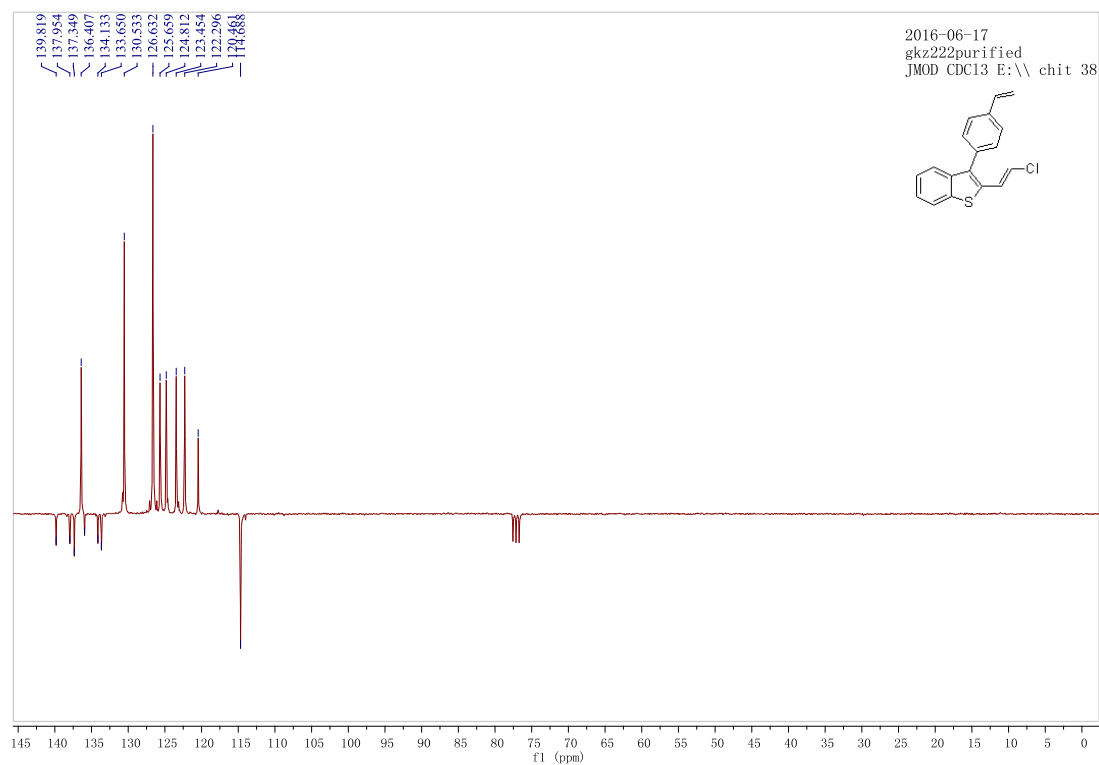

**Fig. 28**  $^{13}\text{C}$  NMR of (*E*)-2-(2-chlorovinyl)-3-(4-vinylphenyl)benzo[*b*]thiophene **8f**

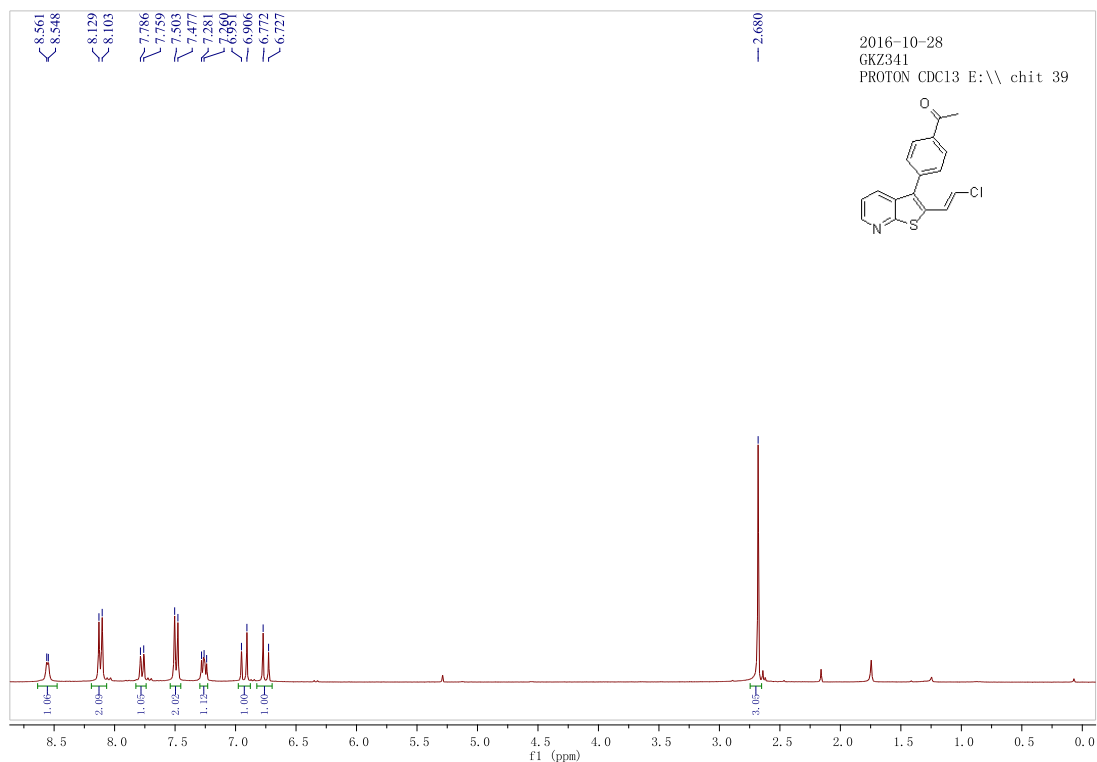

**Fig. 29**  $^1\text{H}$  NMR of (*E*)-1-(4-(2-(2-chlorovinyl)thieno[2,3-b]pyridin-3-yl)phenyl)ethanone **8g**

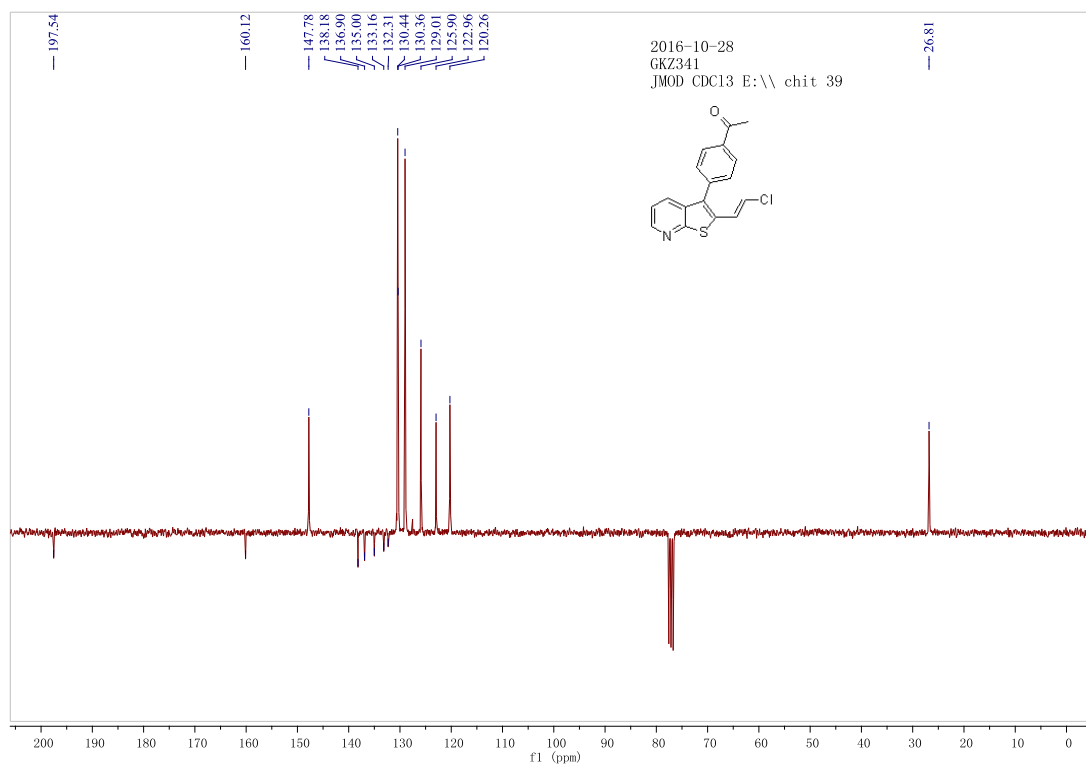

**Fig. 30**  $^{13}\text{C}$  NMR of (*E*)-1-(4-(2-(2-chlorovinyl)thieno[2,3-b]pyridin-3-yl)phenyl)ethanone **8g**



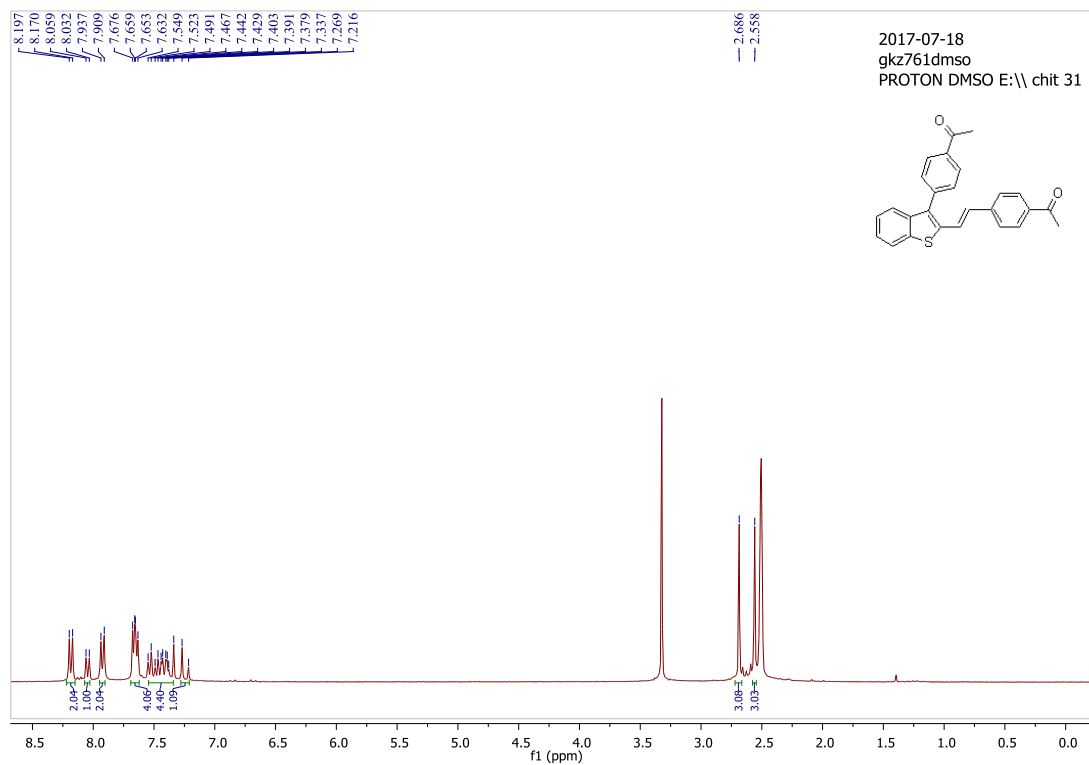

**Fig. 31**  $^1\text{H}$  NMR of (*E*)-1-(4-(2-(3-(4-acetylphenyl)benzo[*b*]thiophen-2-yl)vinyl)phenyl)ethan-1-one **1aa**

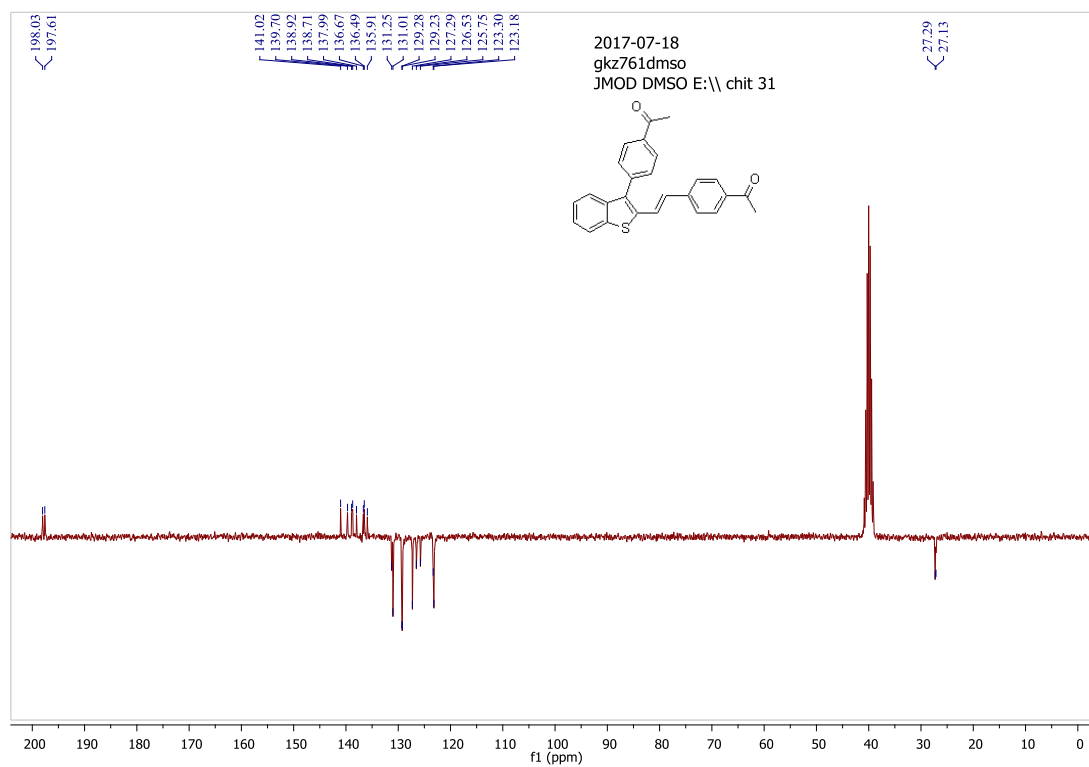

**Fig. 32**  $^{13}\text{C}$  NMR of (*E*)-1-(4-(2-(3-(4-acetylphenyl)benzo[*b*]thiophen-2-yl)vinyl)phenyl)ethan-1-one **1aa**

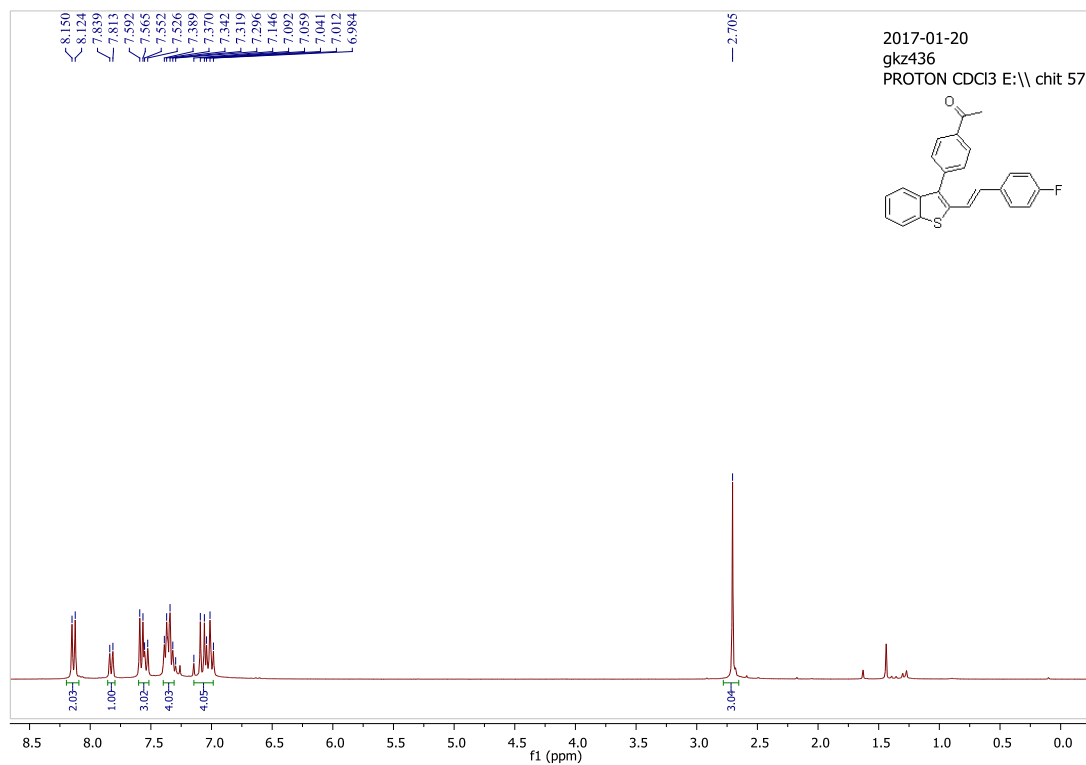

**Fig. 33**  $^1\text{H}$  NMR of (*E*)-1-(4-(2-(4-fluorostyryl)benzo[b]thiophen-3-yl)phenyl)ethanone **1ab**

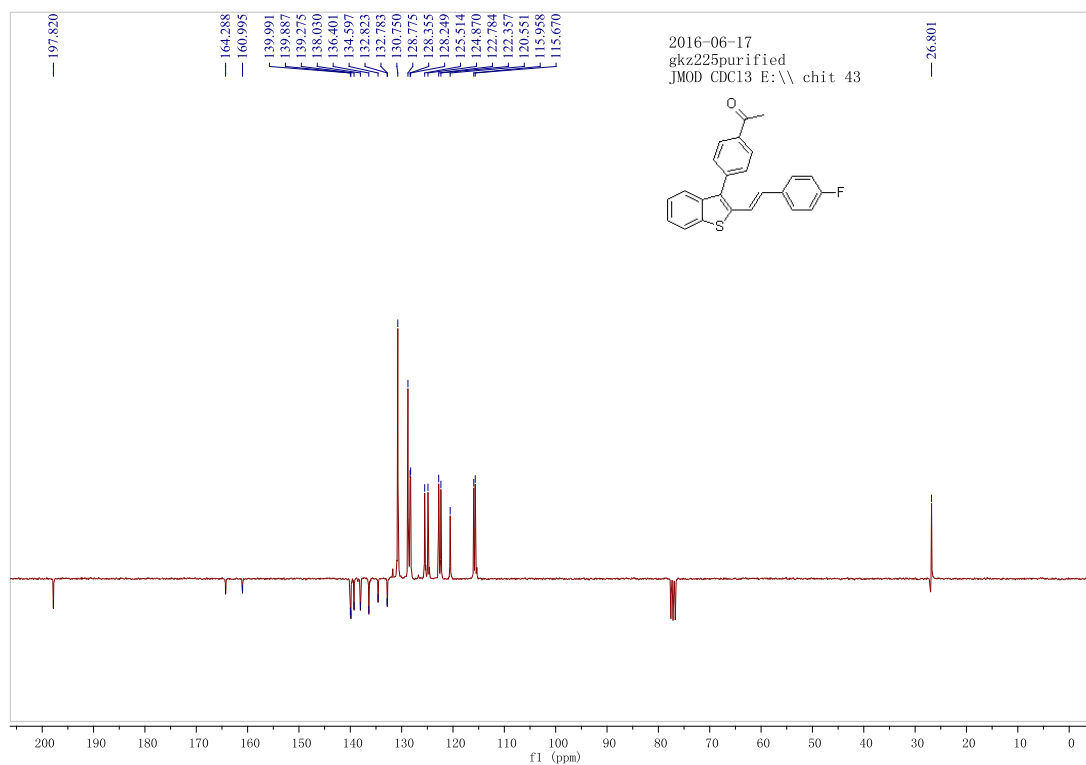

**Fig. 34**  $^{13}\text{C}$  NMR of (*E*)-1-(4-(2-(4-fluorostyryl)benzo[b]thiophen-3-yl)phenyl)ethanone **1ab**

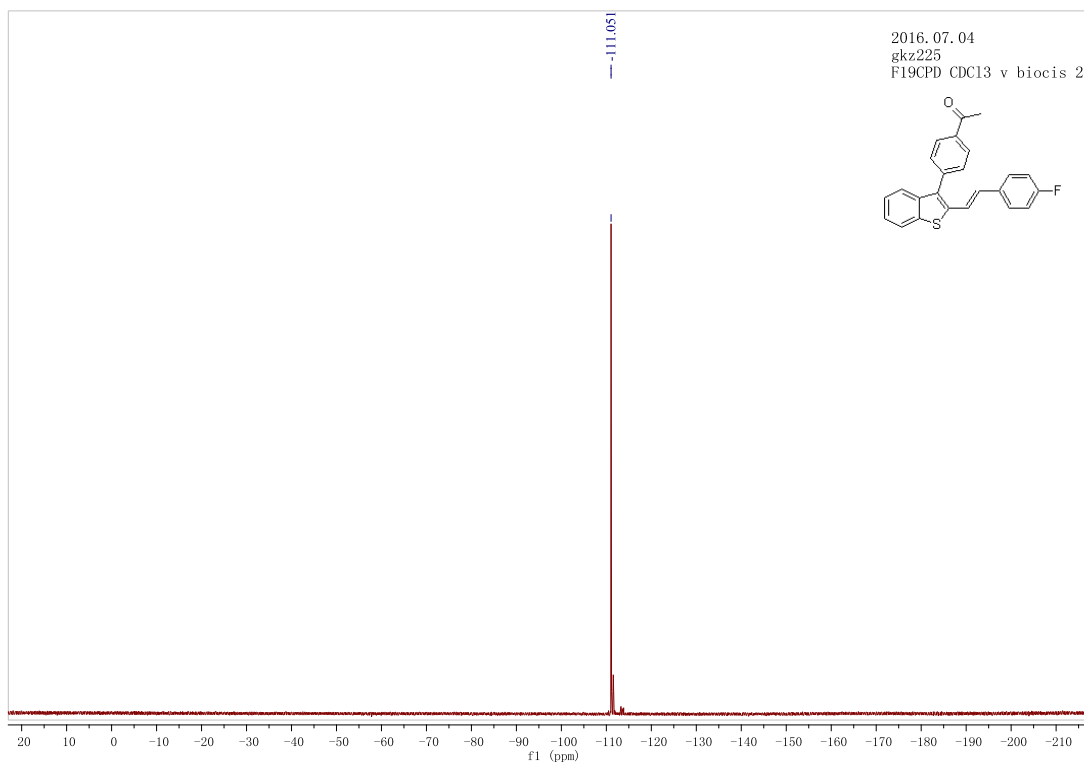

**Fig. 35**  $^{19}\text{F}$  NMR of (*E*)-1-(4-(2-(4-fluorostyryl)benzo[b]thiophen-3-yl)phenyl)ethanone **1ab**

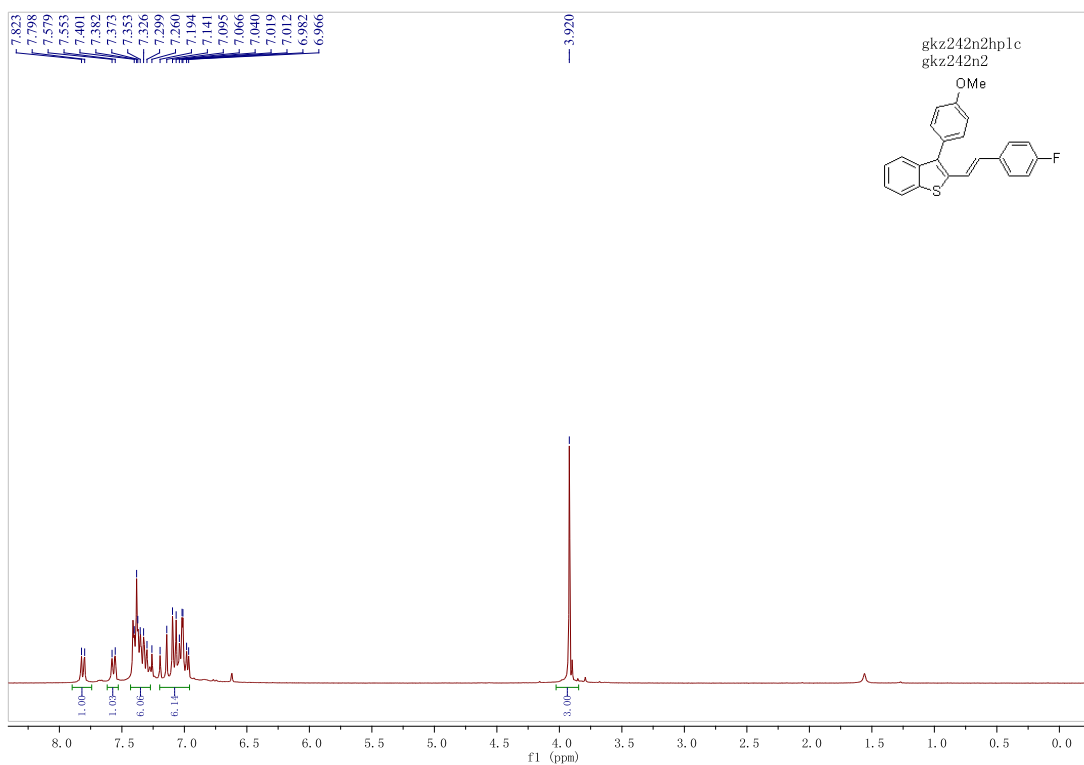

**Fig. 36**  $^1\text{H}$  NMR of (*E*)-2-(4-fluorostyryl)-3-(4-methoxyphenyl)benzo[b]thiophene **1ac**

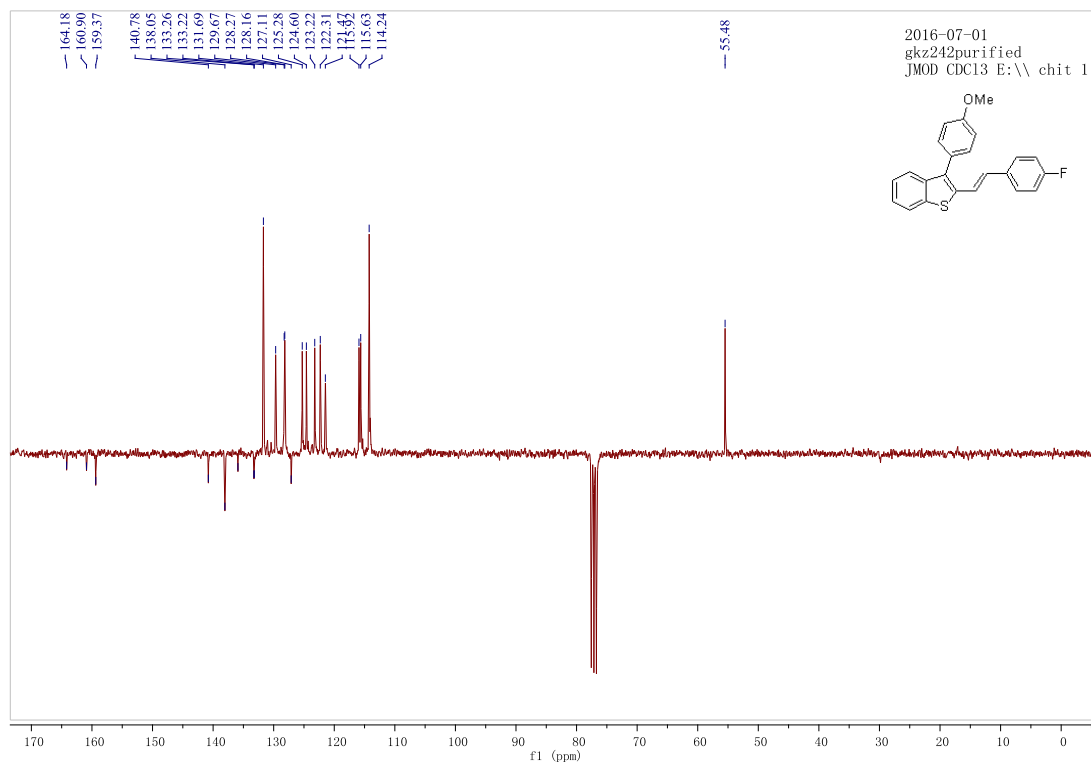

**Fig. 37**  $^{13}\text{C}$  NMR of (*E*)-2-(4-fluorostyryl)-3-(4-methoxyphenyl)benzo[b]thiophene **1ac**

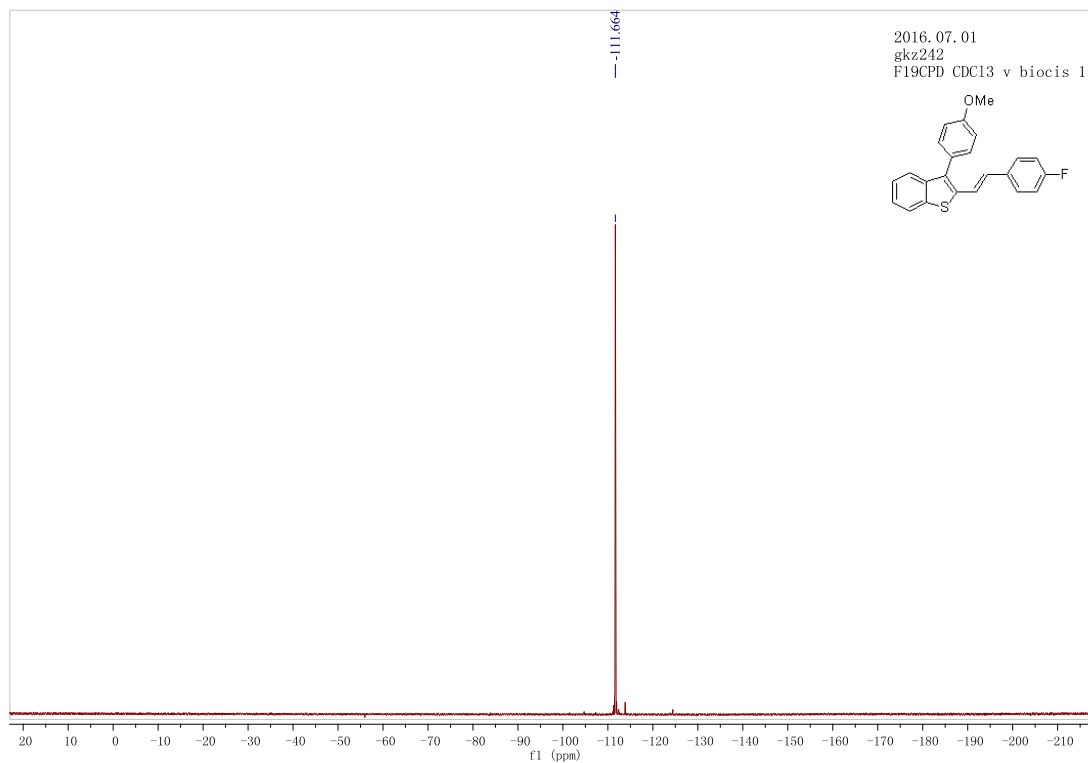

**Fig. 38**  $^{19}\text{F}$  NMR of (*E*)-2-(4-fluorostyryl)-3-(4-methoxyphenyl)benzo[b]thiophene **1ac**

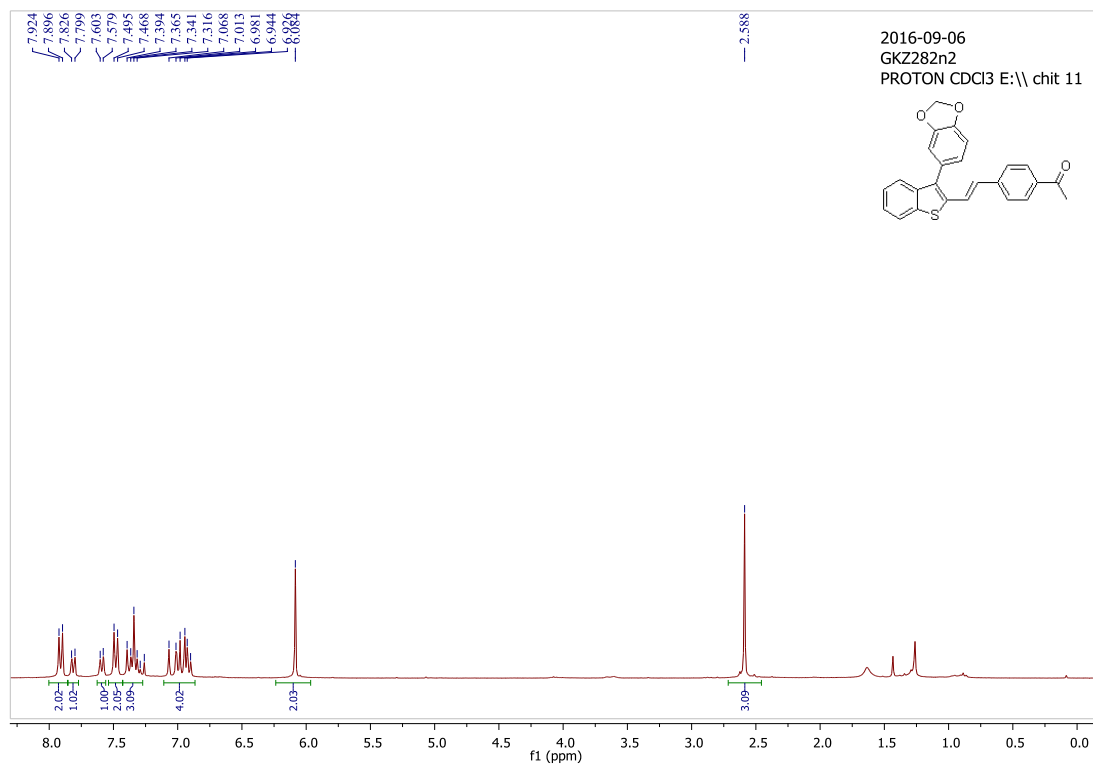

**Fig. 39** the  $^1\text{H}$  NMR of  
*(E)*-1-(4-(2-(3-(benzo[d][1,3]dioxol-5-yl)benzo[b]thiophen-2-yl)vinyl)phenyl)ethan-1-one **1ad**

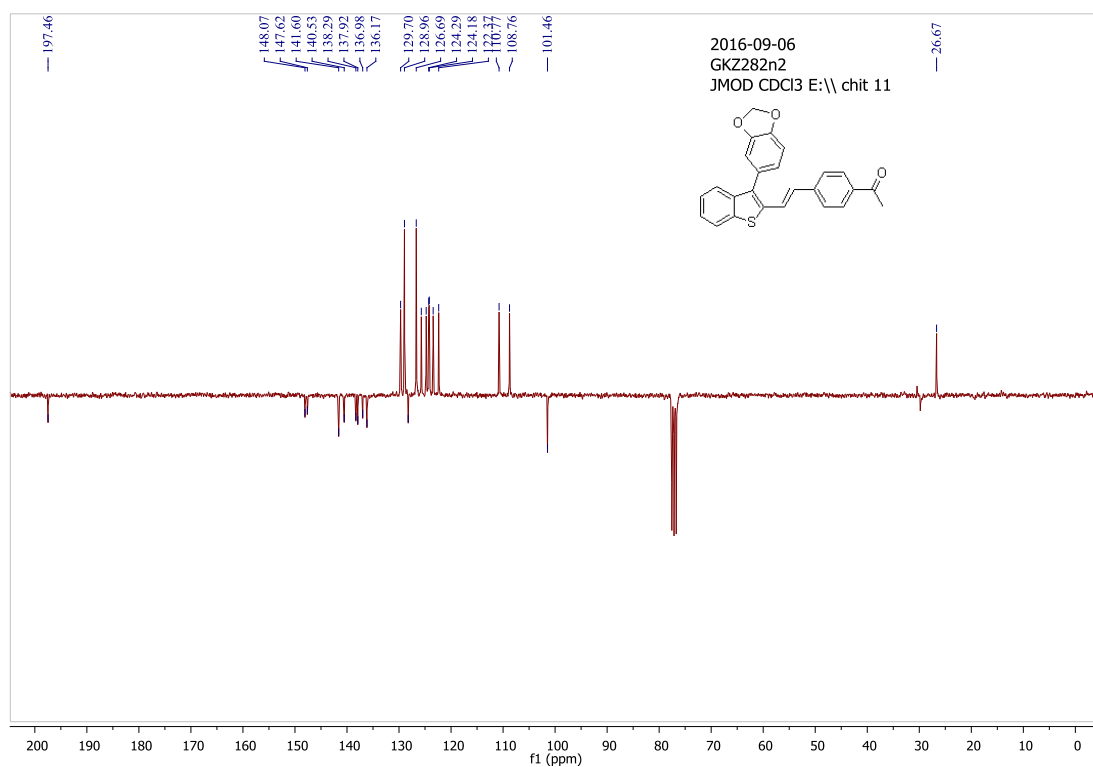

**Fig. 40**  $^{13}\text{C}$  NMR of  
*(E)*-1-(4-(2-(3-(benzo[d][1,3]dioxol-5-yl)benzo[b]thiophen-2-yl)vinyl)phenyl)ethan-1-one **1ad**

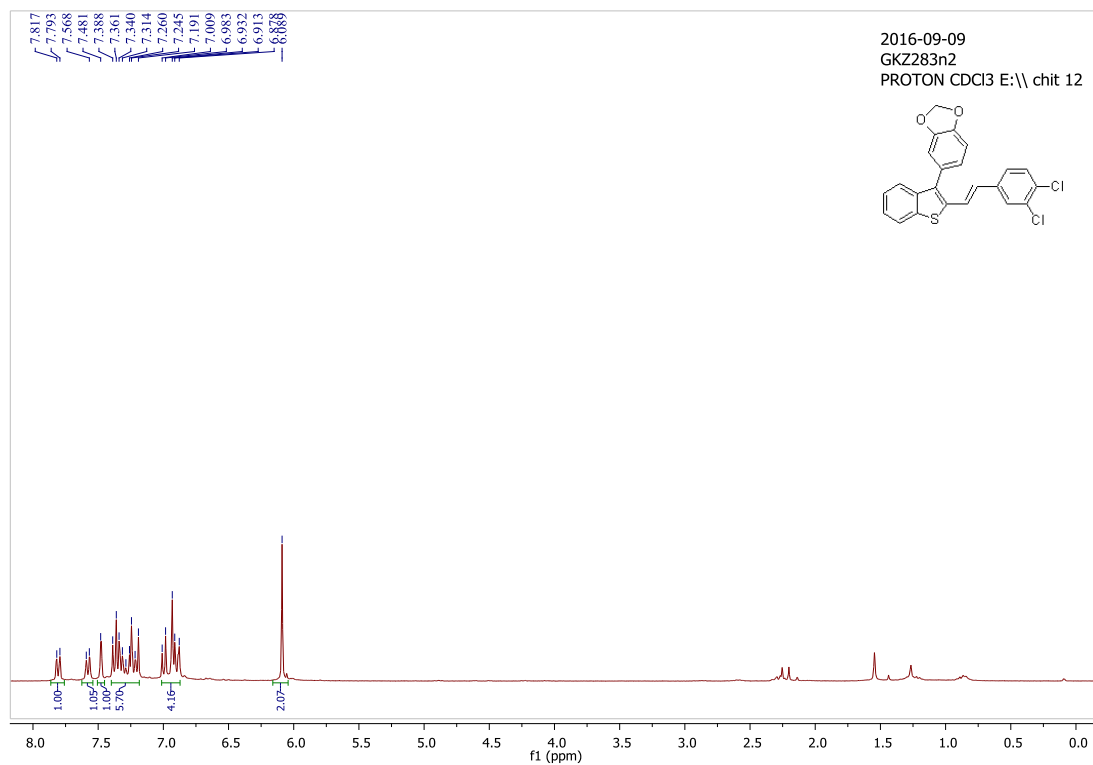

**Fig. 41**  $^1\text{H}$  NMR of (*E*)-5-(2-(3,4-dichlorostyryl)benzo[b]thiophen-3-yl)benzo[d][1,3]dioxole **1ae**

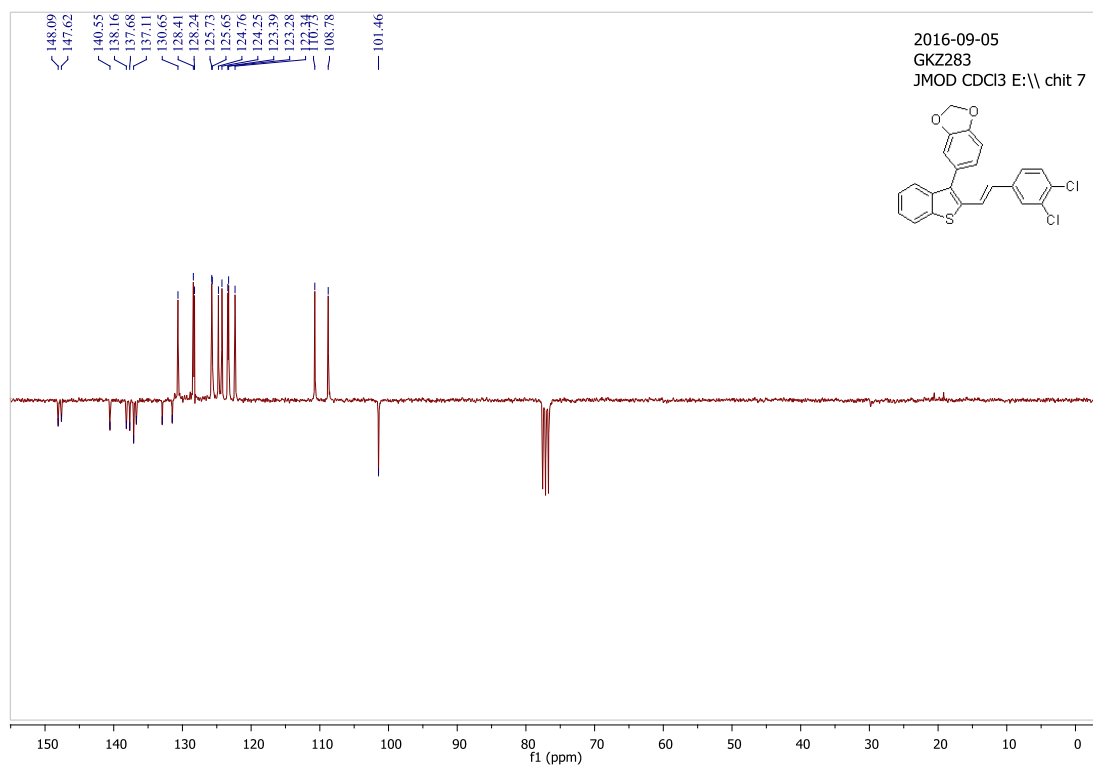

**Fig. 42**  $^{13}\text{C}$  NMR of (*E*)-5-(2-(3,4-dichlorostyryl)benzo[b]thiophen-3-yl)benzo[d][1,3]dioxole **1ae**

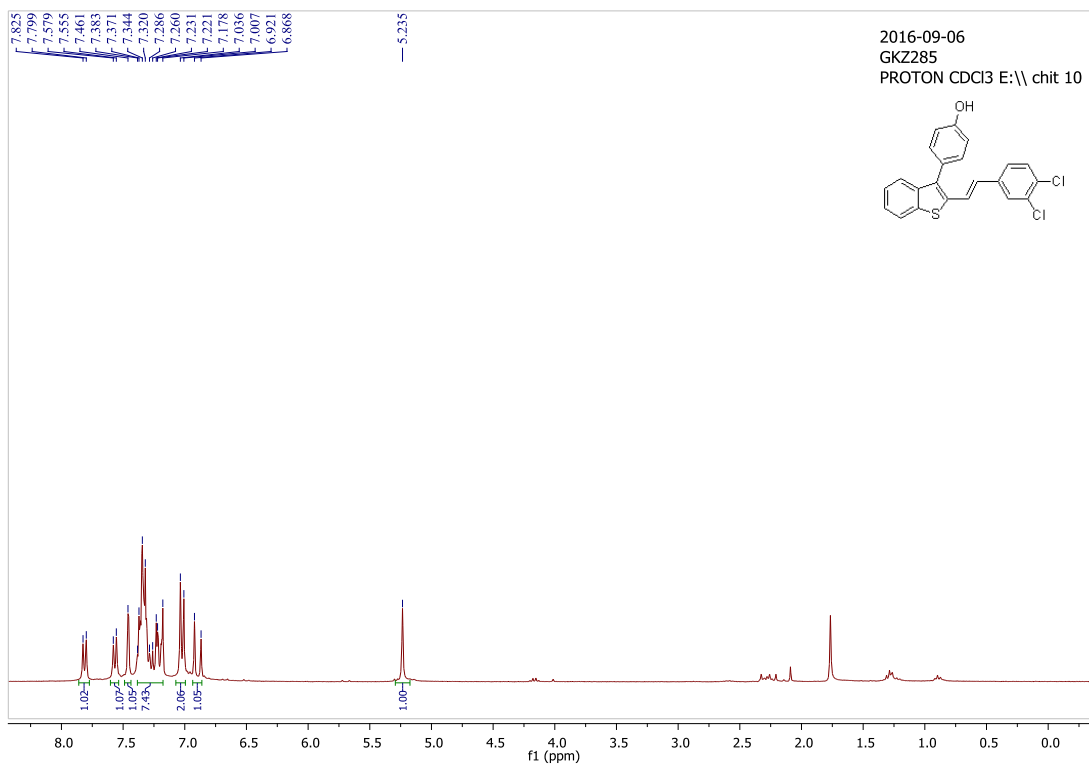

**Fig. 43**  $^1\text{H}$  NMR of (*E*)-4-(2-(3,4-dichlorostyryl)benzo[b]thiophen-3-yl)phenol **1af**

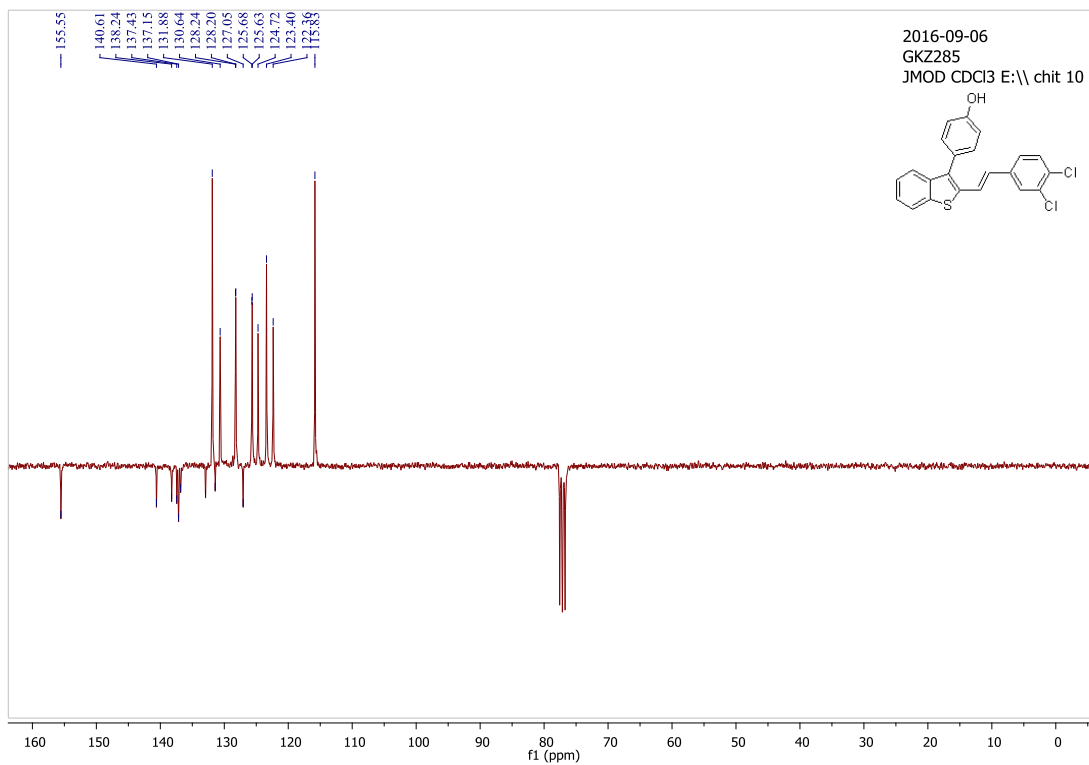

**Fig. 44**  $^{13}\text{C}$  NMR of (*E*)-4-(2-(3,4-dichlorostyryl)benzo[b]thiophen-3-yl)phenol **1af**

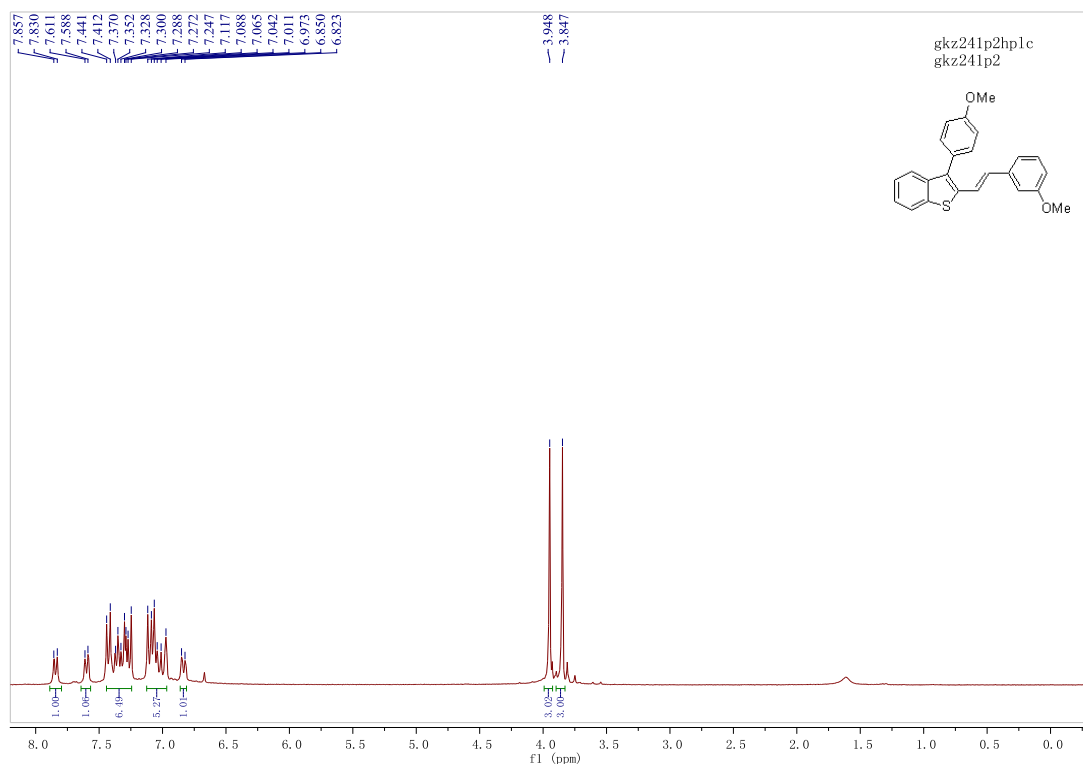

**Fig. 45**  $^1\text{H}$  NMR of (*E*)-3-(4-methoxyphenyl)-2-(3-methoxystyryl)benzo[b]thiophene **1ag**

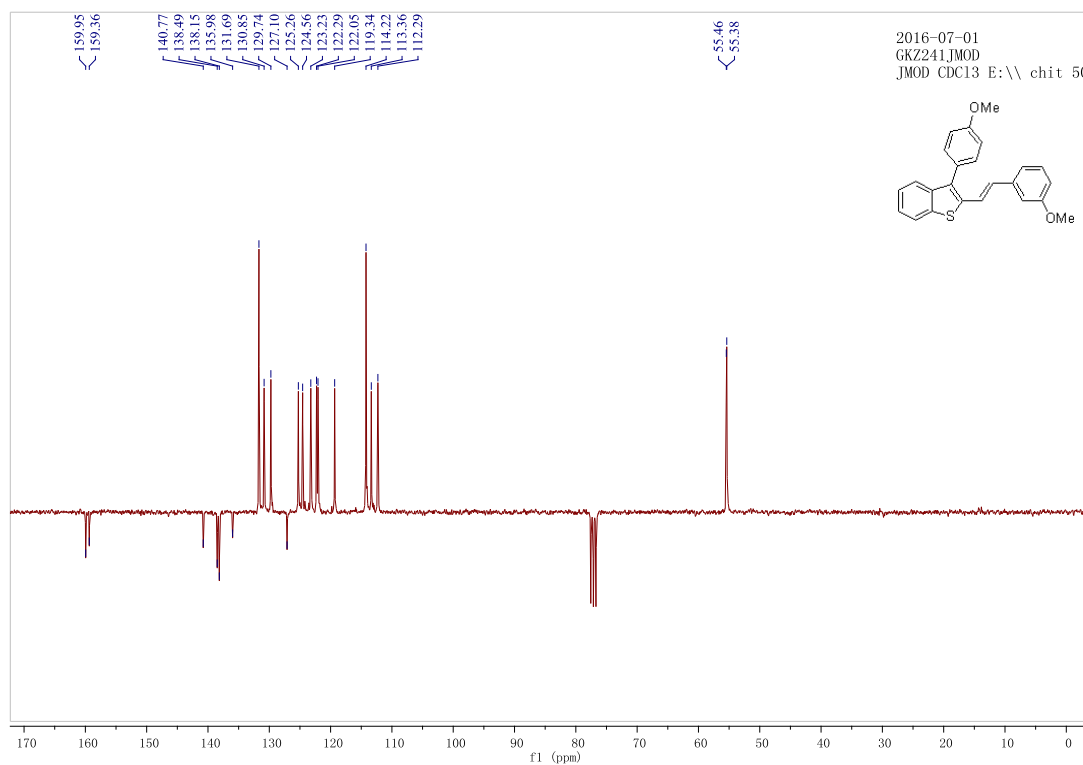

**Fig. 46**  $^{13}\text{C}$  NMR of (*E*)-3-(4-methoxyphenyl)-2-(3-methoxystyryl)benzo[b]thiophene **1ag**



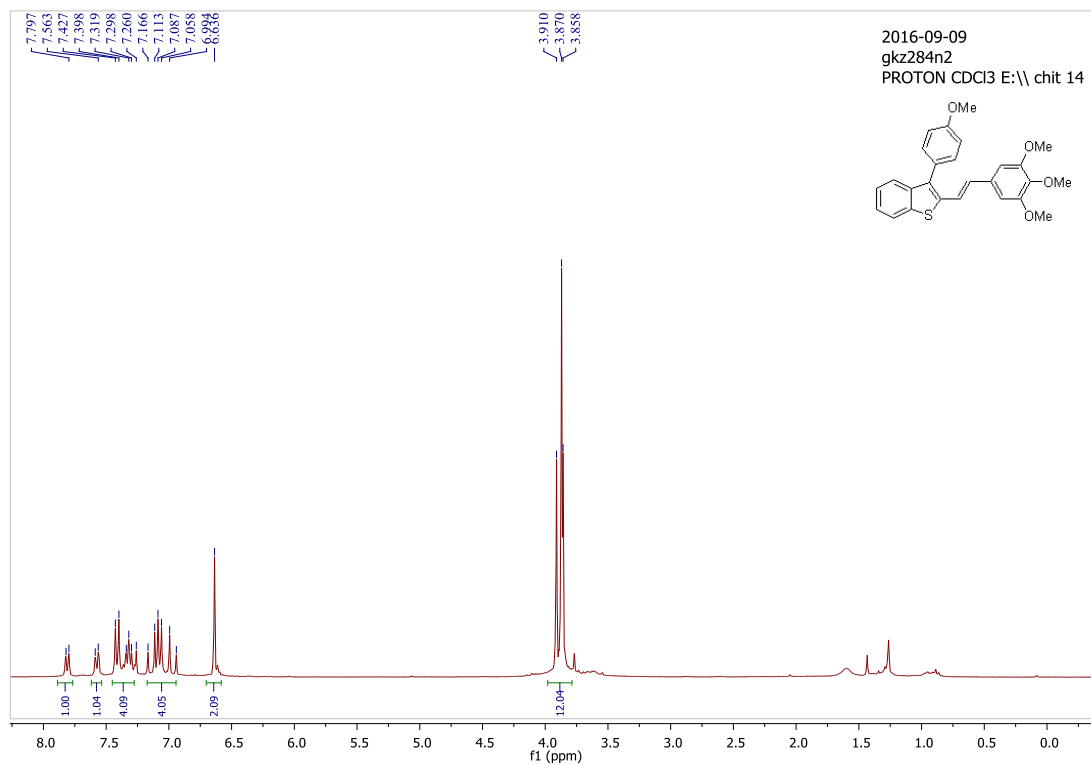

**Fig. 47**  $^1\text{H}$  NMR of (*E*)-3-(4-methoxyphenyl)-2-(3,4,5-trimethoxystyryl)benzo[b]thiophene **1ah**

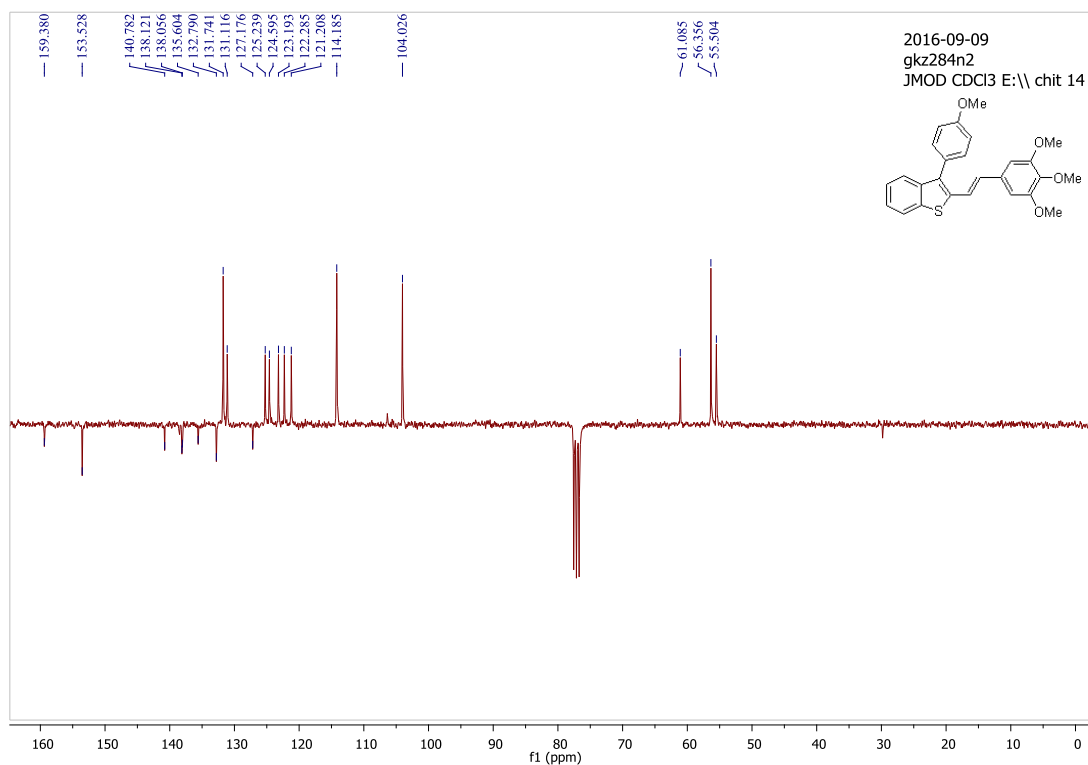

**Fig. 48**  $^{13}\text{C}$  NMR of (*E*)-3-(4-methoxyphenyl)-2-(3,4,5-trimethoxystyryl)benzo[b]thiophene **1ah**

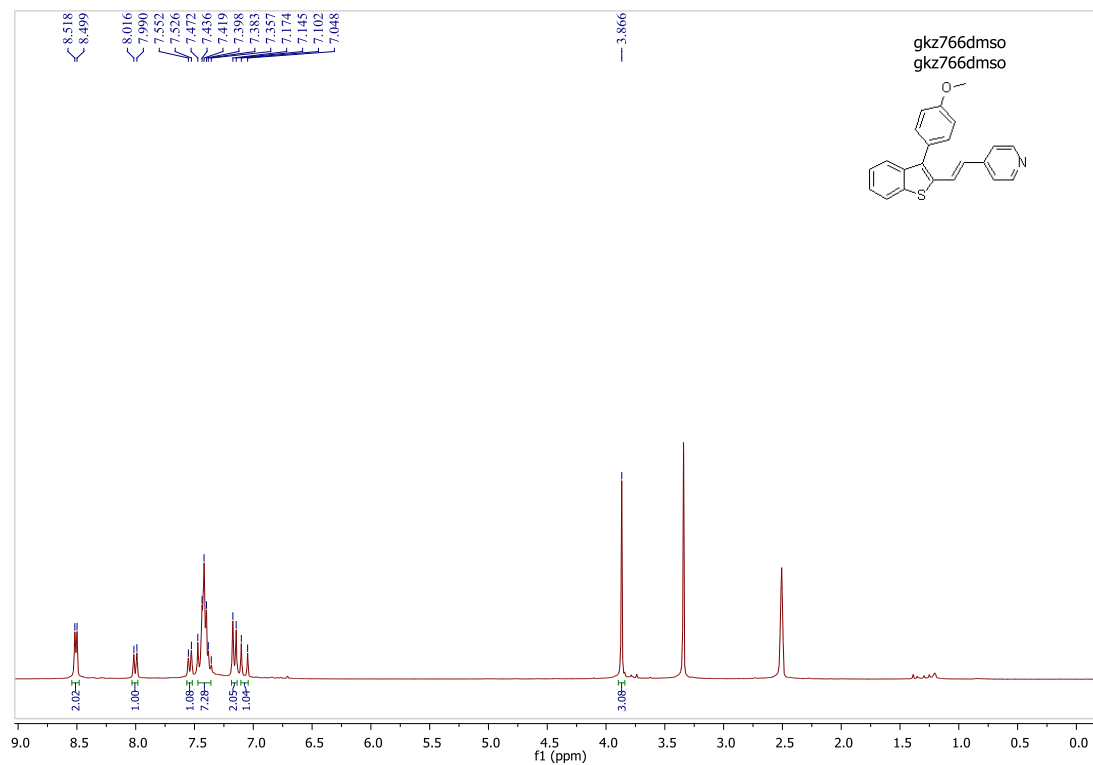

**Fig. 49**  $^1\text{H}$  NMR of (*E*)-4-(2-(3-(4-methoxyphenyl)benzo[b]thiophen-2-yl)vinyl)pyridine **1ai**

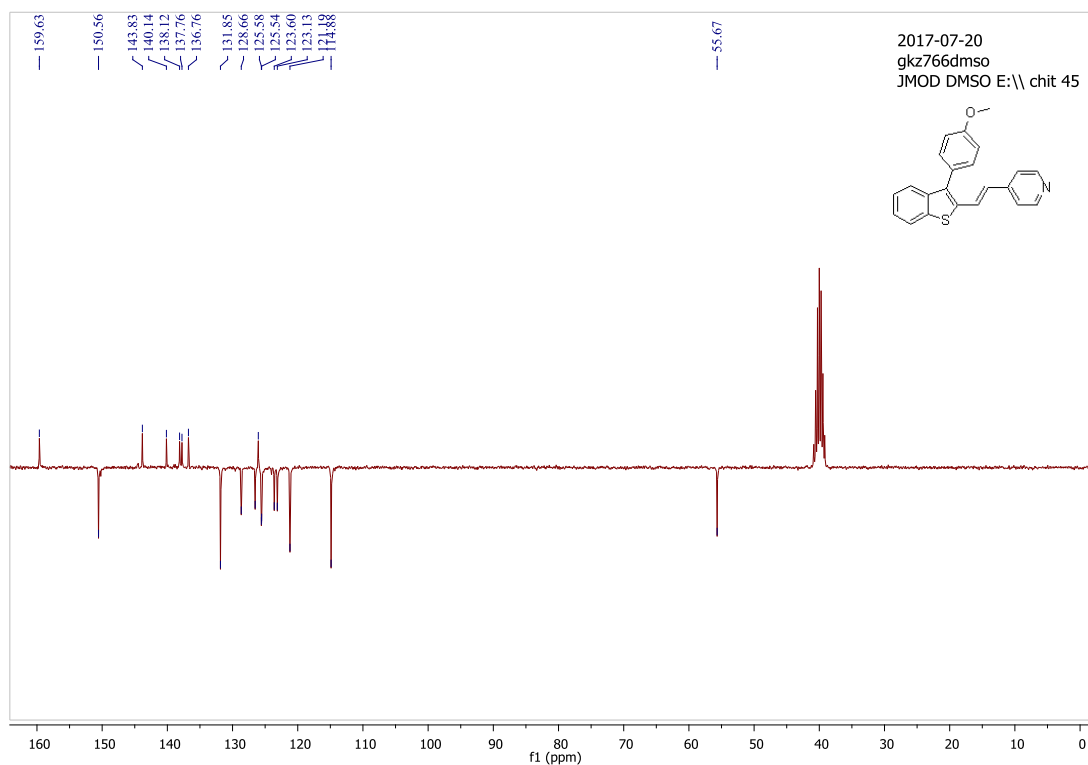

**Fig. 50**  $^{13}\text{C}$  NMR of (*E*)-4-(2-(3-(4-methoxyphenyl)benzo[b]thiophen-2-yl)vinyl)pyridine **1ai**

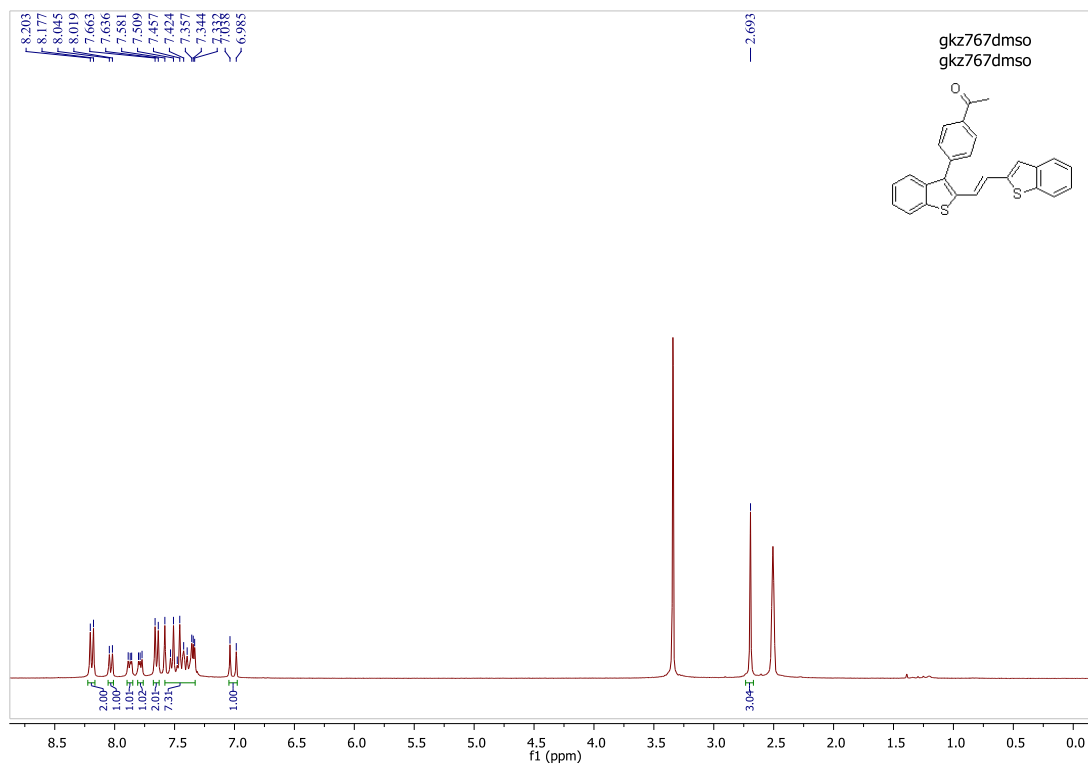

**Fig. 51**  $^1\text{H}$  NMR of (*E*)-1-(4-(2-(2-(benzo[*b*]thiophen-2-yl)vinyl)benzo[*b*]thiophen-3-yl)phenyl)ethan-1-one **1aj**

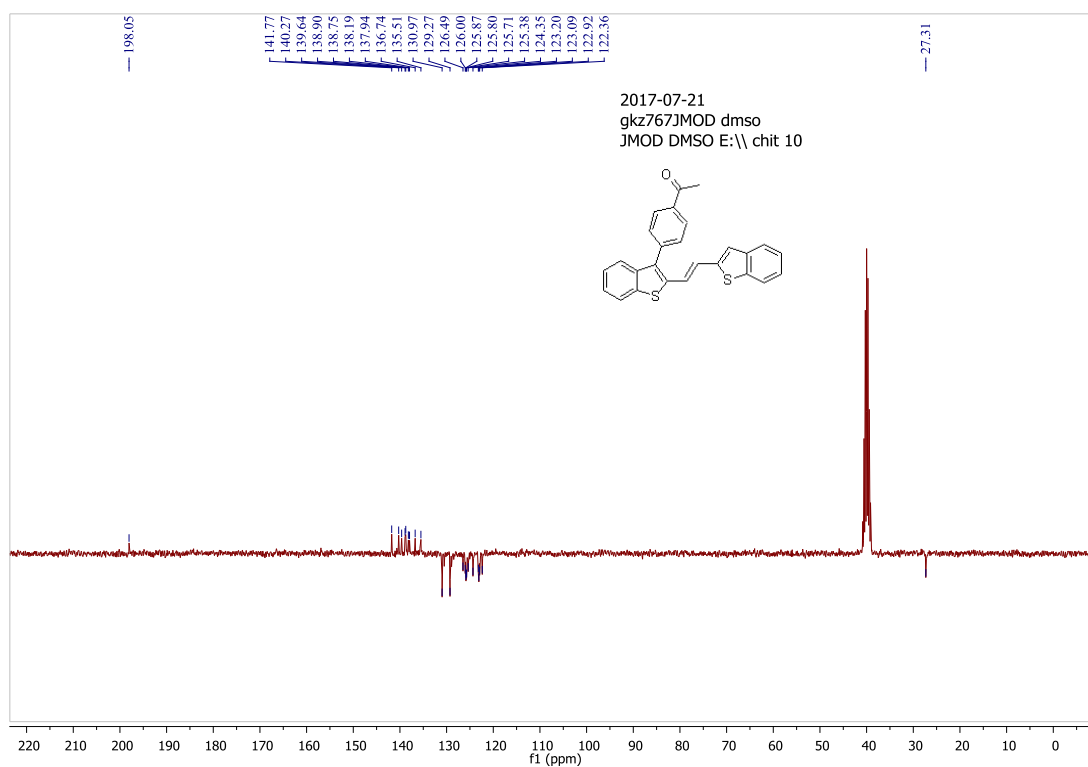

**Fig. 52**  $^{13}\text{C}$  NMR of (*E*)-1-(4-(2-(2-(benzo[*b*]thiophen-2-yl)vinyl)benzo[*b*]thiophen-3-yl)phenyl)ethan-1-one **1aj**

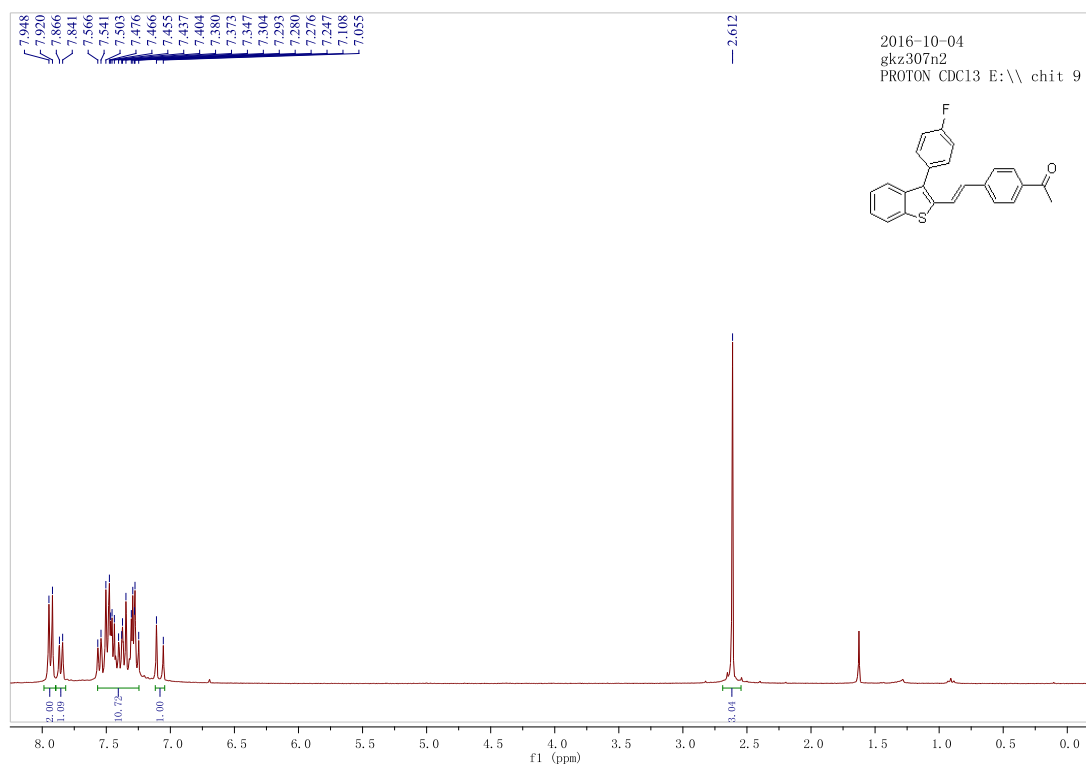

**Fig. 53**  $^1\text{H}$  NMR of (*E*)-1-(4-(2-(3-(4-fluorophenyl)benzo[b]thiophen-2-yl)vinyl)phenyl)ethanone **1ak**

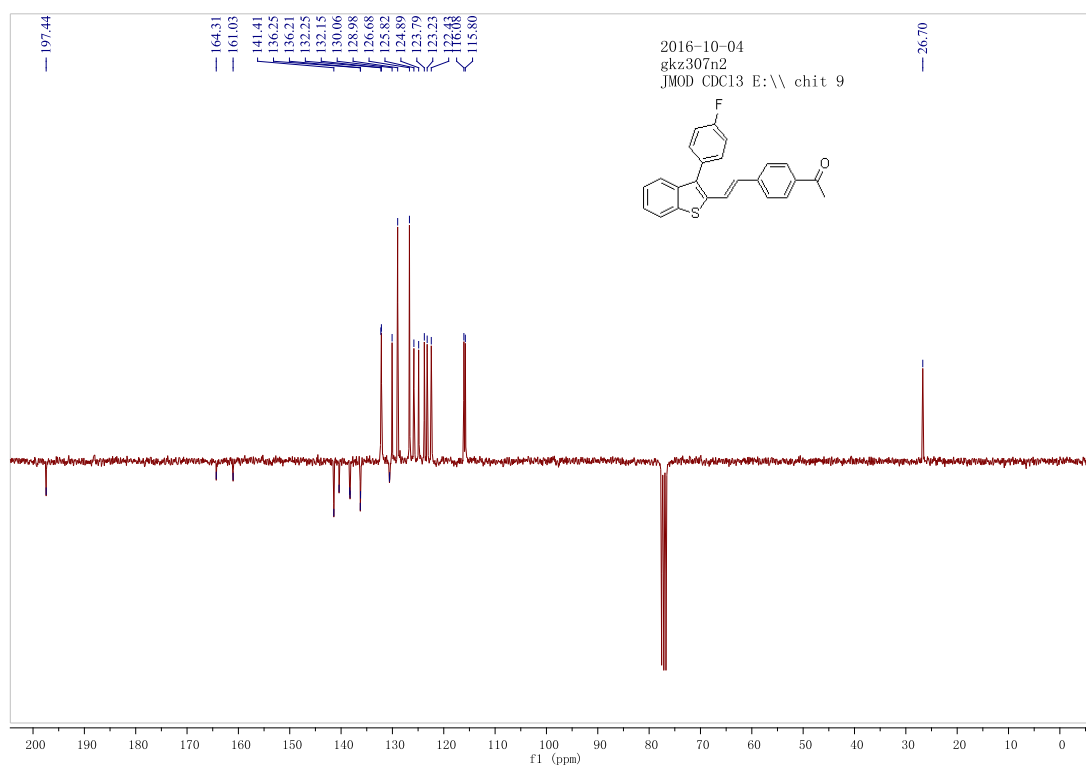

**Fig. 54**  $^{13}\text{C}$  NMR of (*E*)-1-(4-(2-(3-(4-fluorophenyl)benzo[b]thiophen-2-yl)vinyl)phenyl)ethanone **1ak**

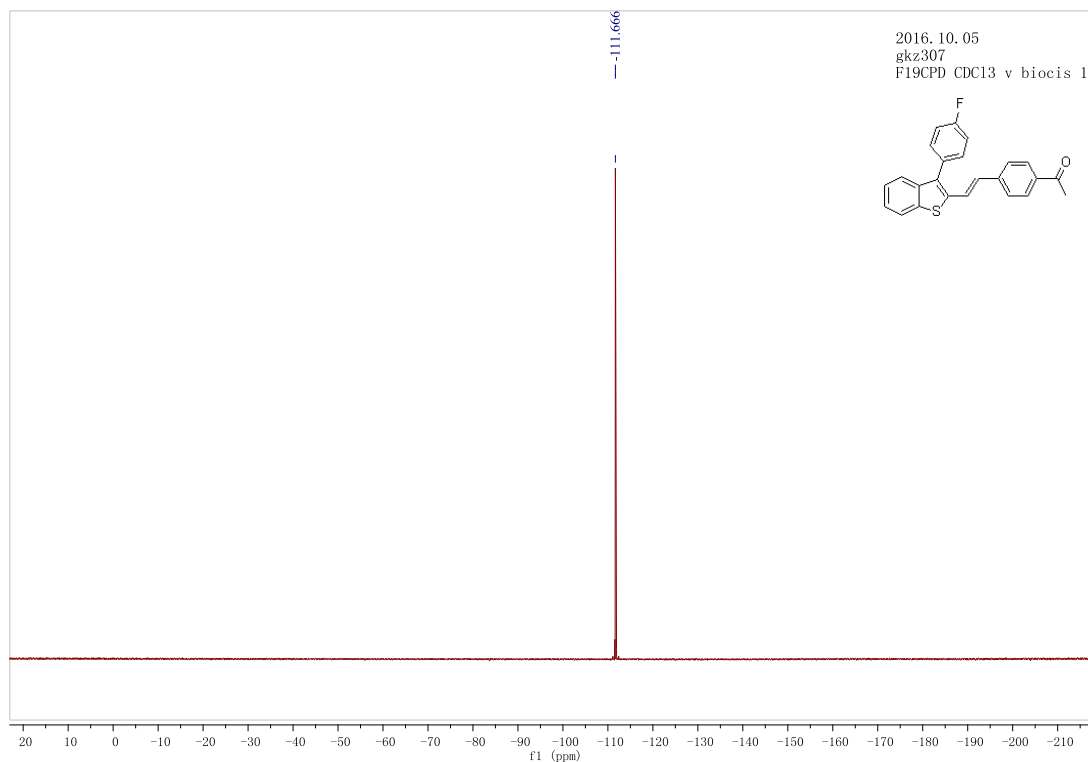

**Fig. 55**  $^{19}\text{F}$  NMR of (*E*)-1-(4-(2-(3-(4-fluorophenyl)benzo[b]thiophen-2-yl)vinyl)phenyl)ethanone **1ak**

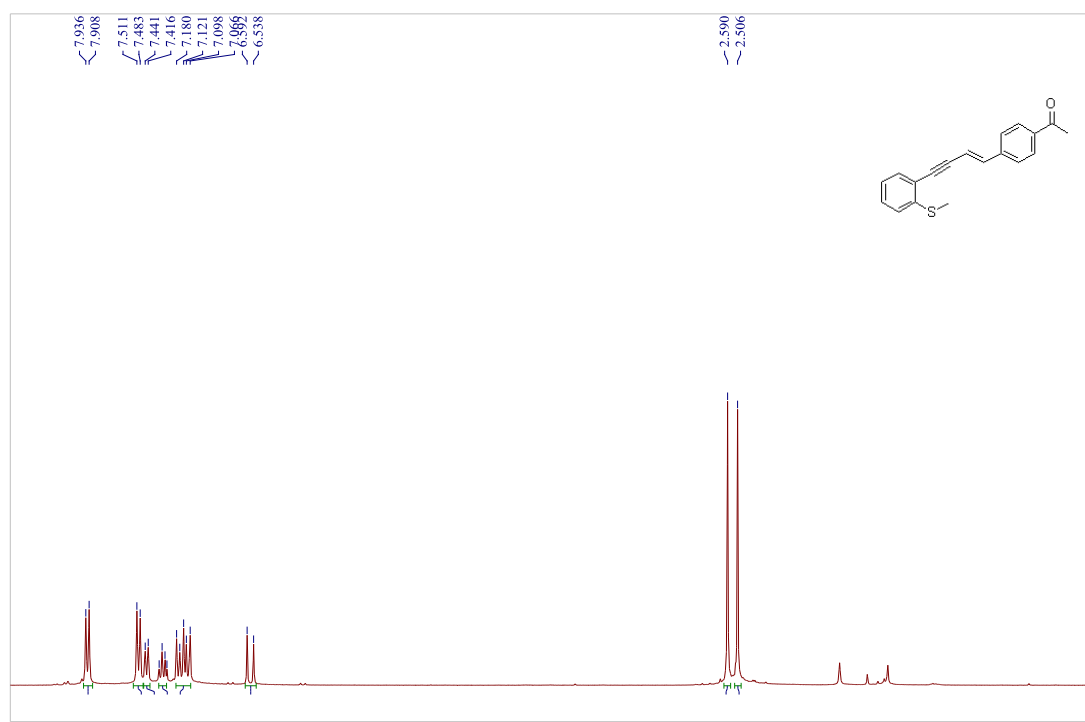

**Fig. 56**  $^1\text{H}$  NMR of (*E*)-1-(4-(4-(2-(methylthio)phenyl)but-1-en-3-yn-1-yl)phenyl)ethanone **11**

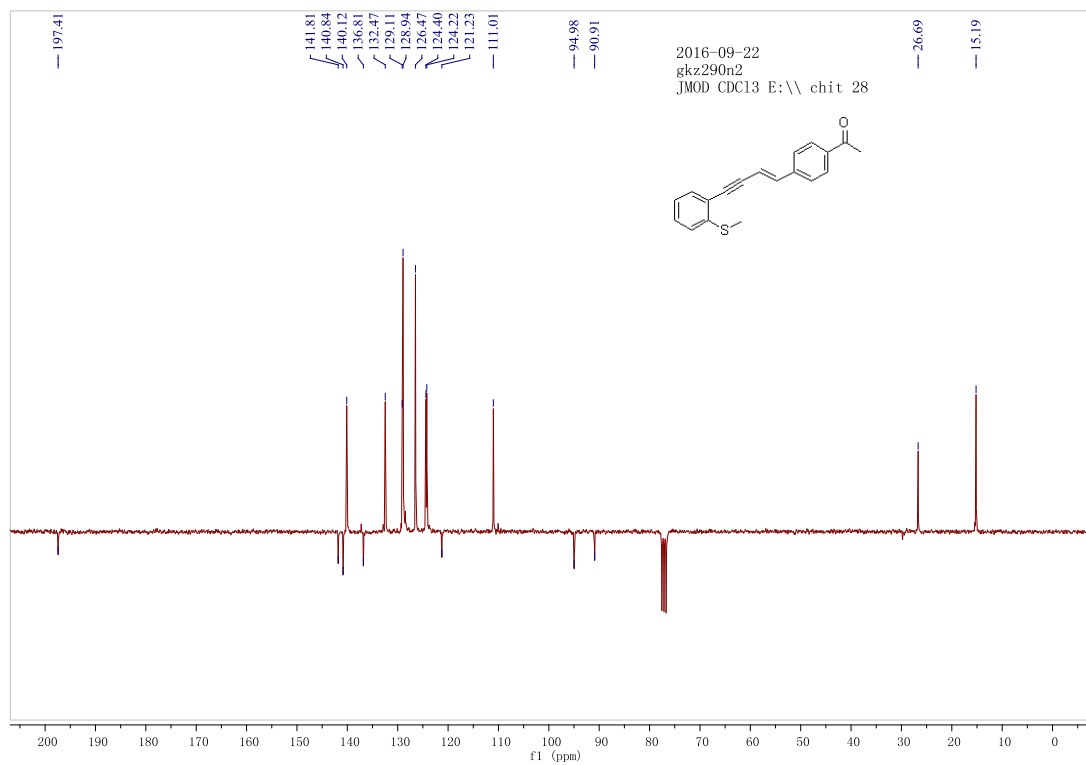

**Fig. 57**  $^{13}\text{C}$  NMR of (*E*)-1-(4-(4-(2-(methylthio)phenyl)but-1-en-3-yn-1-yl)phenyl)ethanone

**11**

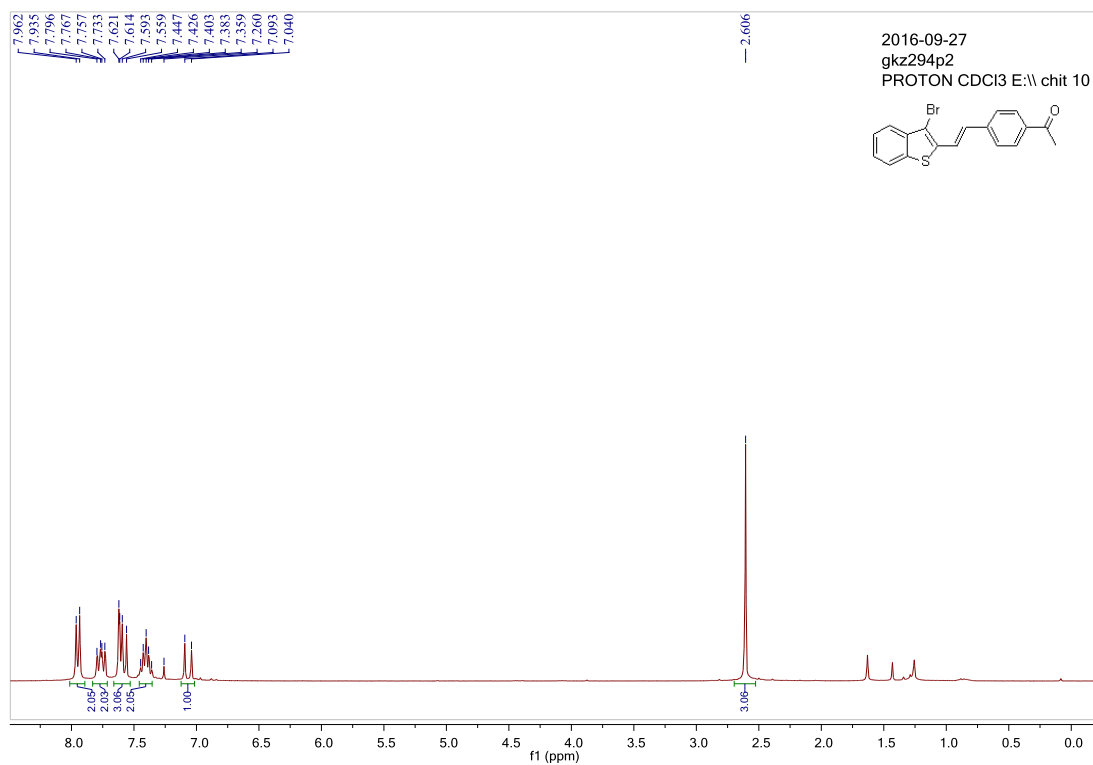

**Fig. 58**  $^1\text{H}$  NMR of (*E*)-1-(4-(2-(3-bromobenzo[b]thiophen-2-yl)vinyl)phenyl)ethanone

**9**

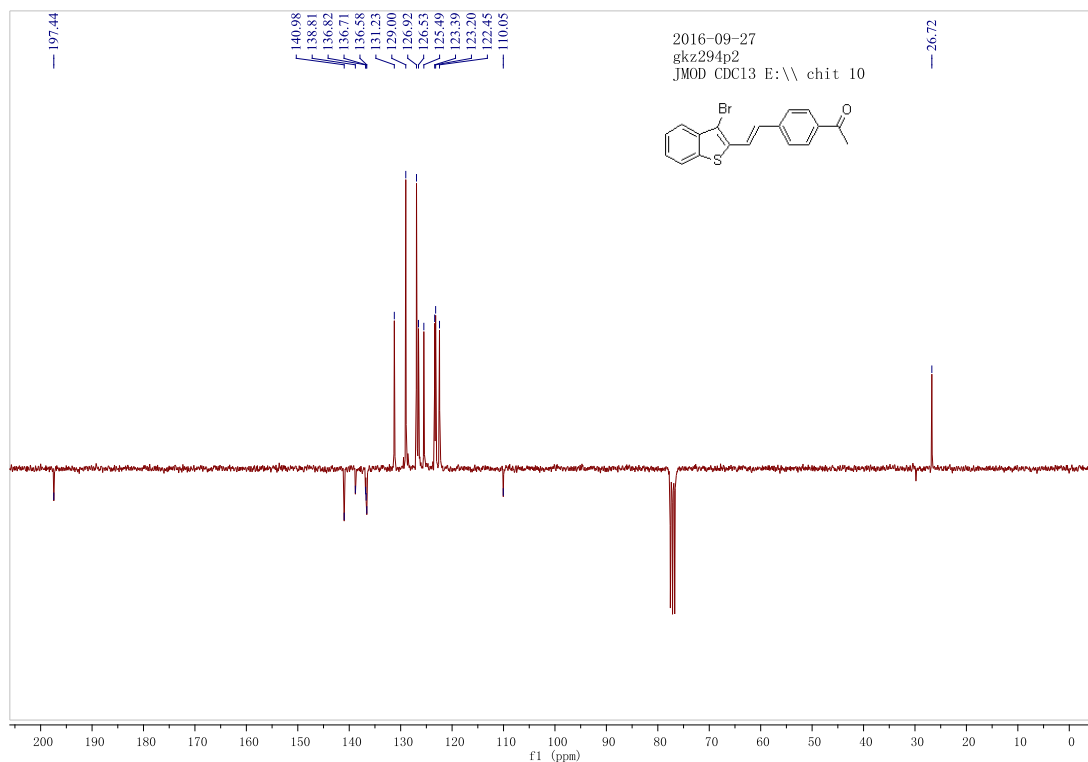

**Fig. 59**  $^{13}\text{C}$  NMR of (*E*)-1-(4-(2-(3-bromobenzo[b]thiophen-2-yl)vinyl)phenyl)ethanone

9

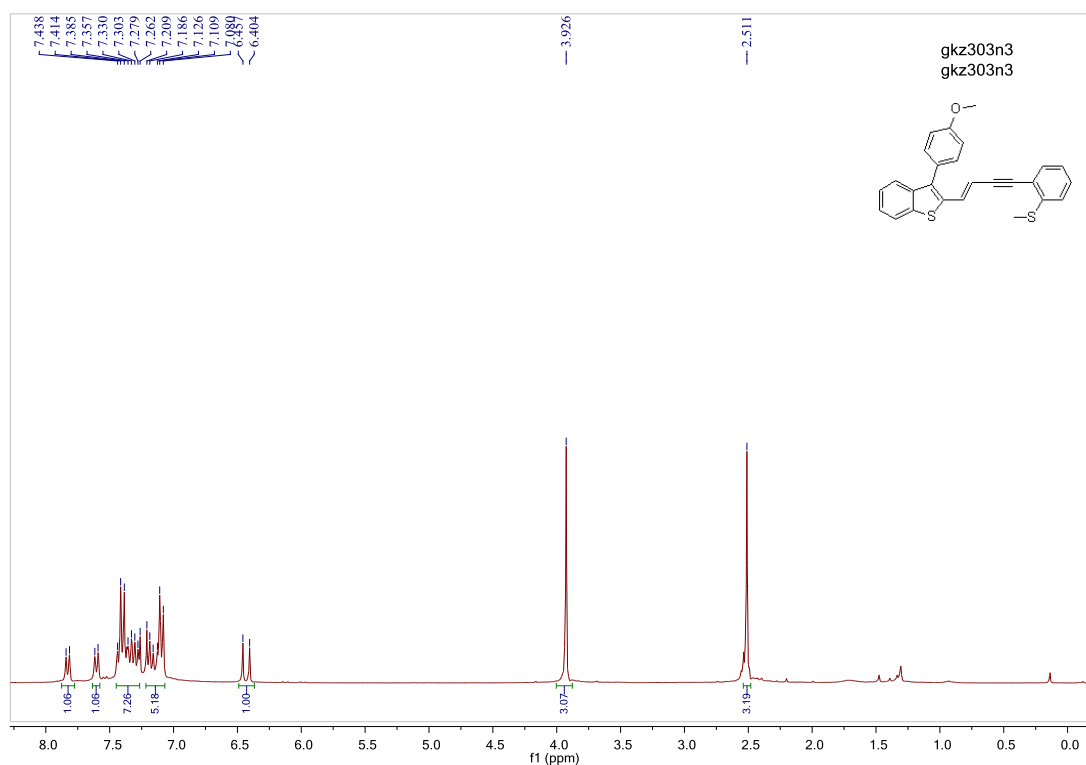

**Fig. 60**  $^1\text{H}$  NMR of  
(*E*)-3-(4-methoxyphenyl)-2-(4-(2-(methylthio)phenyl)but-1-en-3-yn-1-yl)benzo[b]thiophene

12

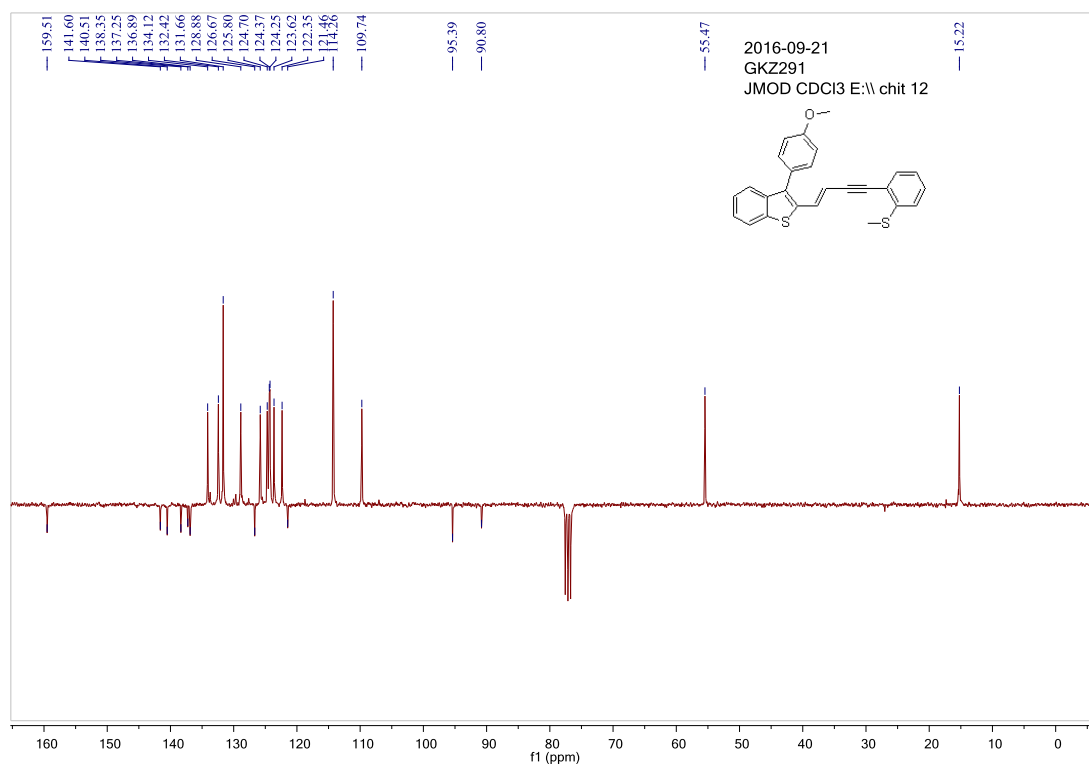

**Fig. 61**  $^{13}\text{C}$  NMR of  
(*E*)-3-(4-methoxyphenyl)-2-(4-(2-(methylthio)phenyl)but-1-en-3-yn-1-yl)benzo[b]thiophene  
**12**

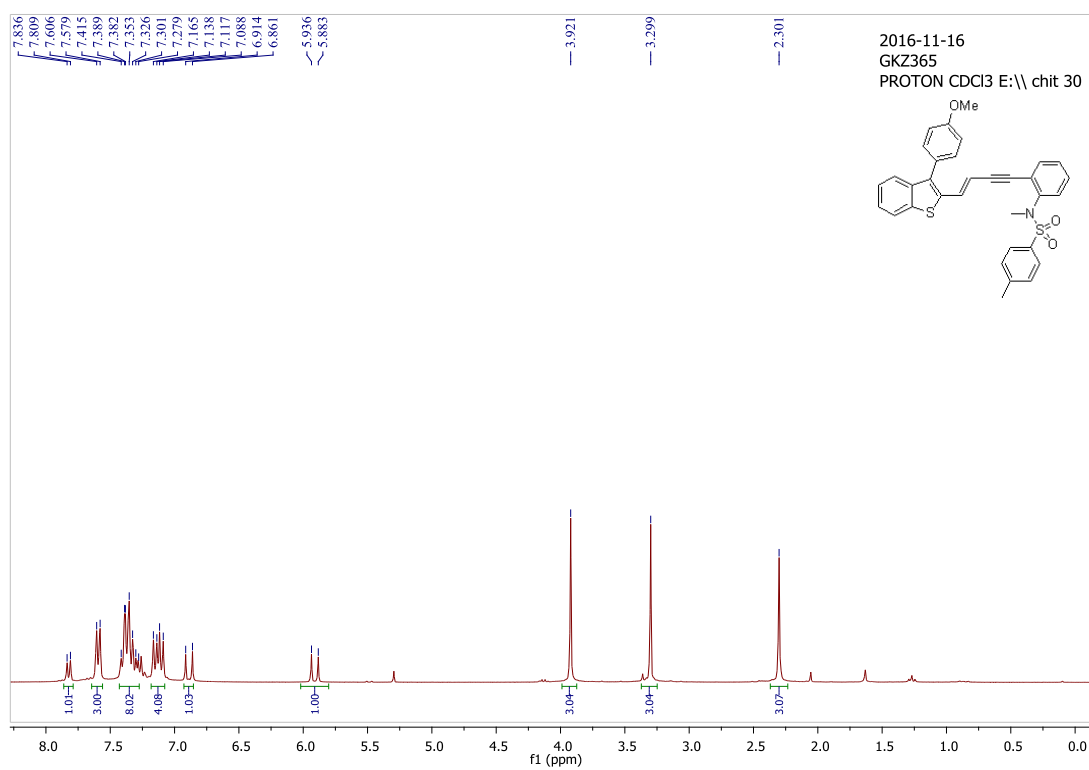

**Fig. 62**  $^1\text{H}$  NMR of  
(*E*)-*N*-(2-(4-(3-(4-methoxyphenyl)benzo[b]thiophen-2-yl)but-3-en-1-yn-1-yl)phenyl)-*N*,4-dimethylbenzene sulfonamide **13**



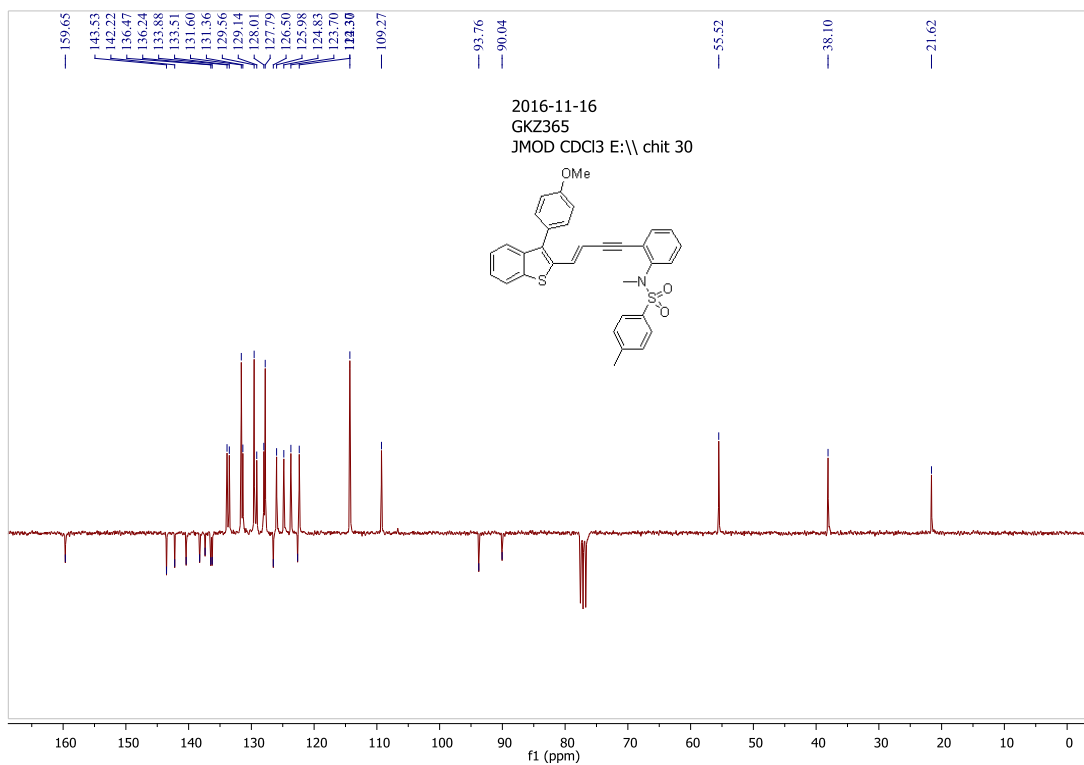

**Fig. 63**  $^1\text{H}$  NMR of *(E)*-N-(2-(4-(3-(4-methoxyphenyl)benzo[b]thiophen-2-yl)but-3-en-1-yn-1-yl)phenyl)-N,4-dimethylbenzenesulfonamide **13**

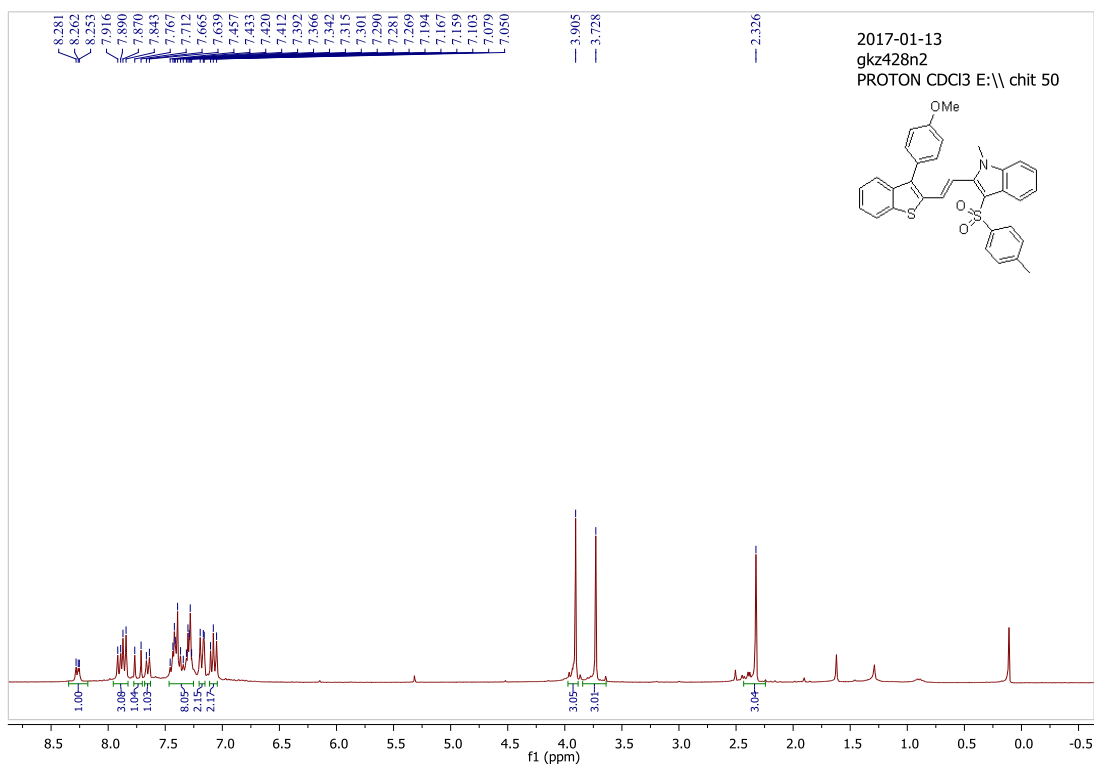

**Fig. 64**  $^1\text{H}$  NMR of *(E)*-2-(2-(3-(4-methoxyphenyl)benzo[b]thiophen-2-yl)vinyl)-1-methyl-3-tosyl-1H-indole **14**

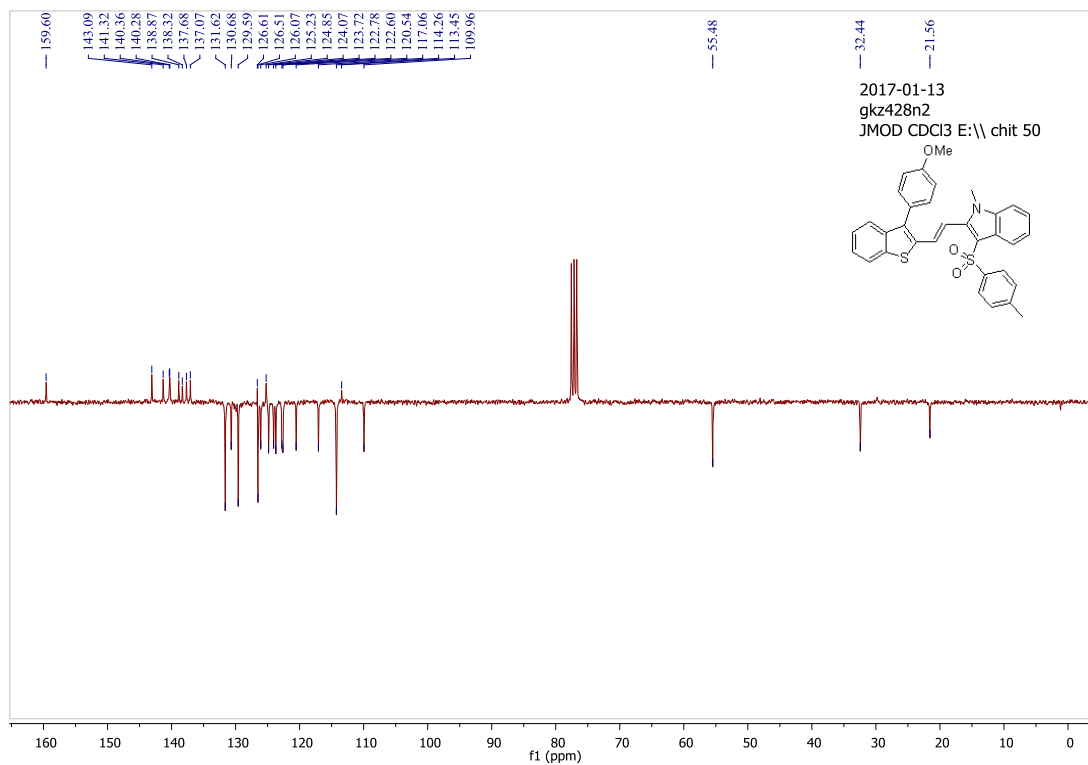

**Fig. 65**  $^{13}\text{C}$  NMR of  
*(E)*-2-(2-(3-(4-methoxyphenyl)benzo[b]thiophen-2-yl)vinyl)-1-methyl-3-tosyl-1H-indole  
**14**

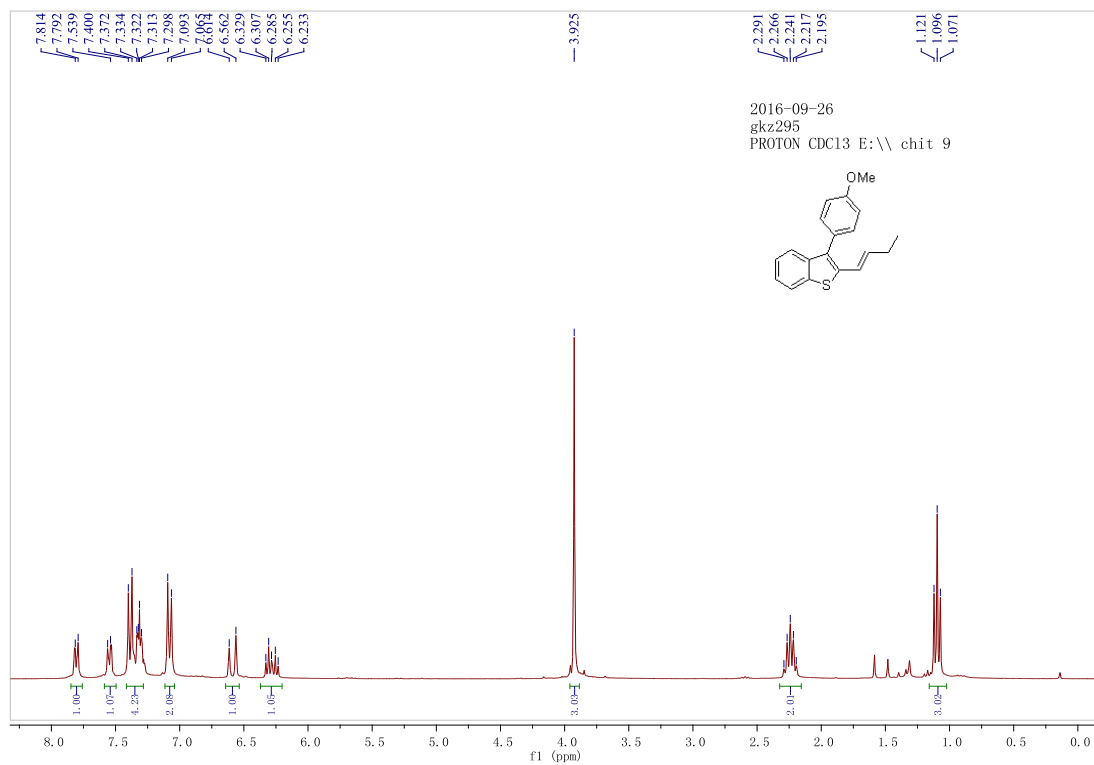

**Fig. 66**  $^1\text{H}$  NMR of *(E)*-2-(but-1-en-1-yl)-3-(4-methoxyphenyl)benzo[b]thiophene **1ca**

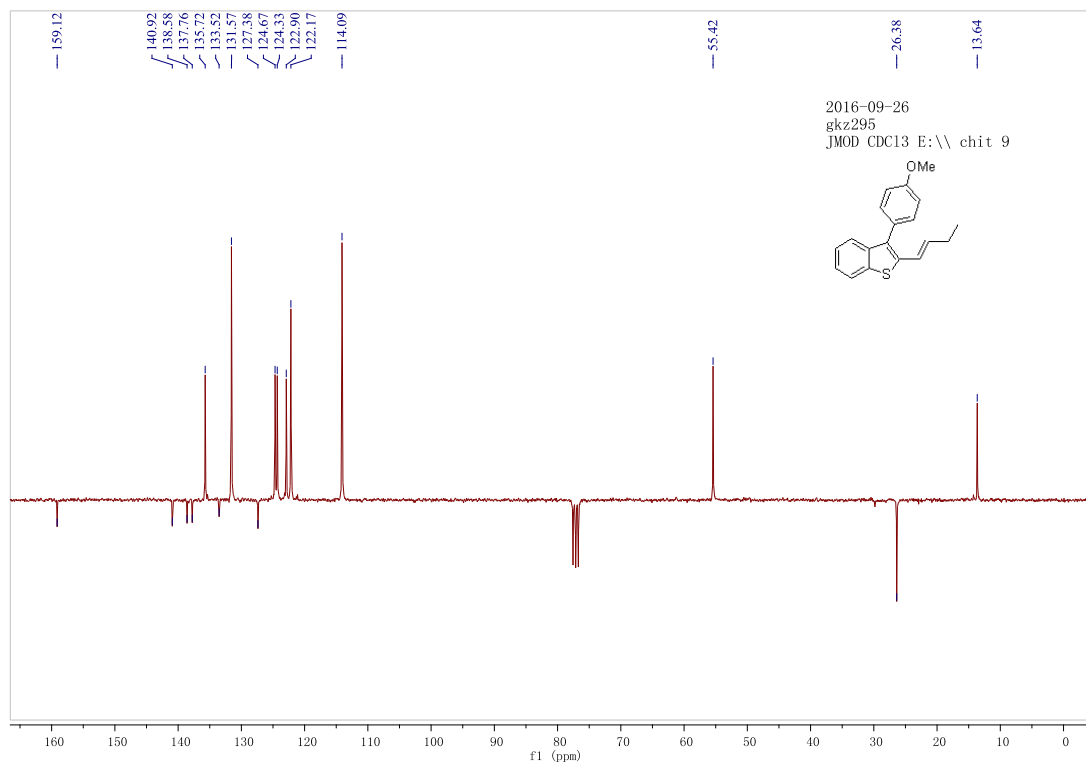

**Fig.67**  $^{13}\text{C}$  NMR of (*E*)-2-(but-1-en-1-yl)-3-(4-methoxyphenyl)benzo[b]thiophene **1ca**

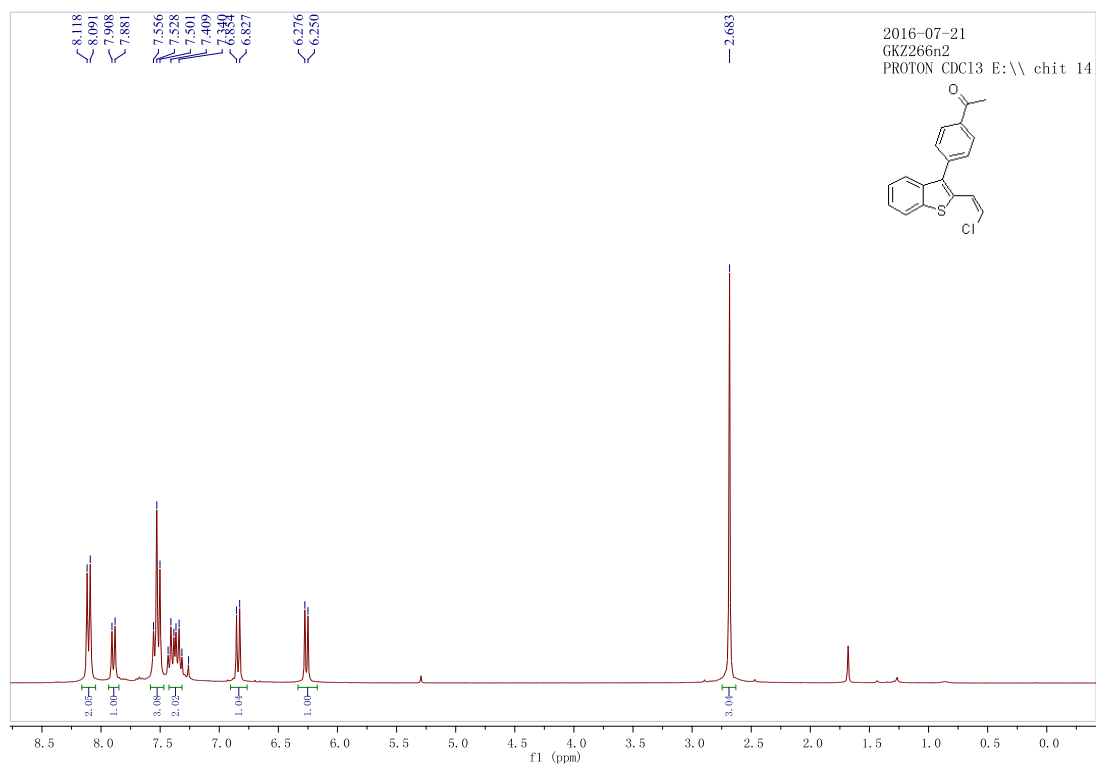

**Fig. 68**  $^1\text{H}$  NMR of (*Z*)-1-(4-(2-(2-chlorovinyl)benzo[b]thiophen-3-yl)phenyl)ethanone **8a**

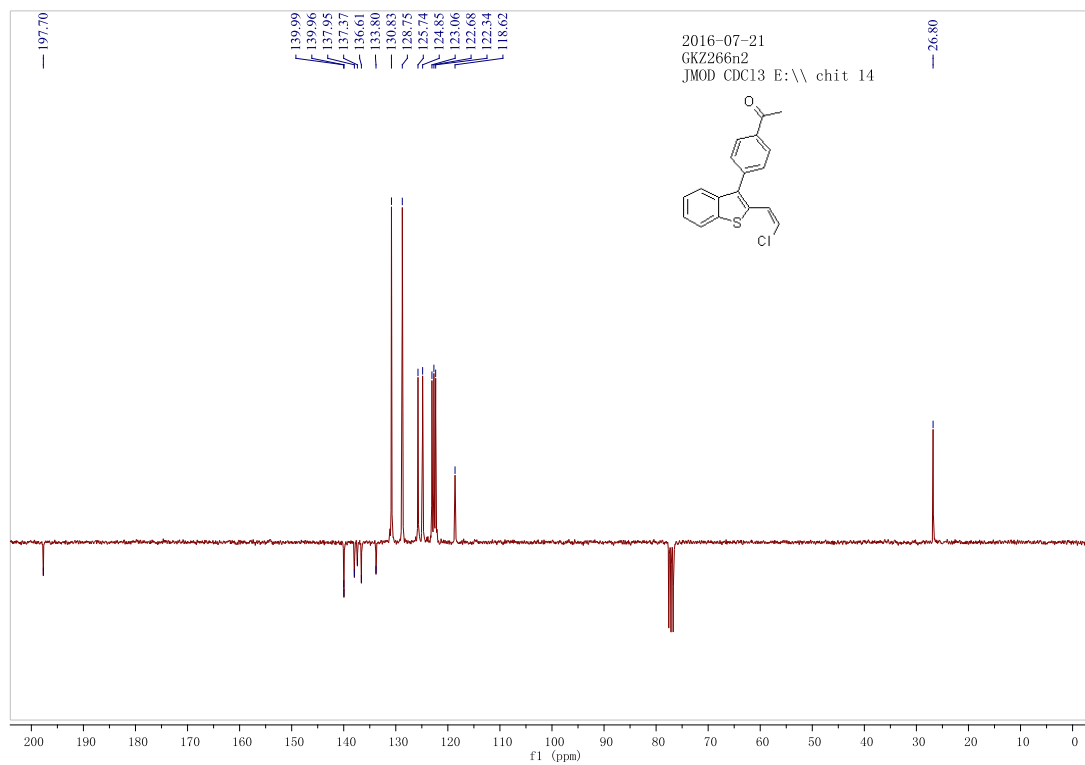

**Fig. 69**  $^{13}\text{C}$  NMR of (Z)-1-(4-(2-(2-chlorovinyl)benzo[b]thiophen-3-yl)phenyl)ethanone **8a**

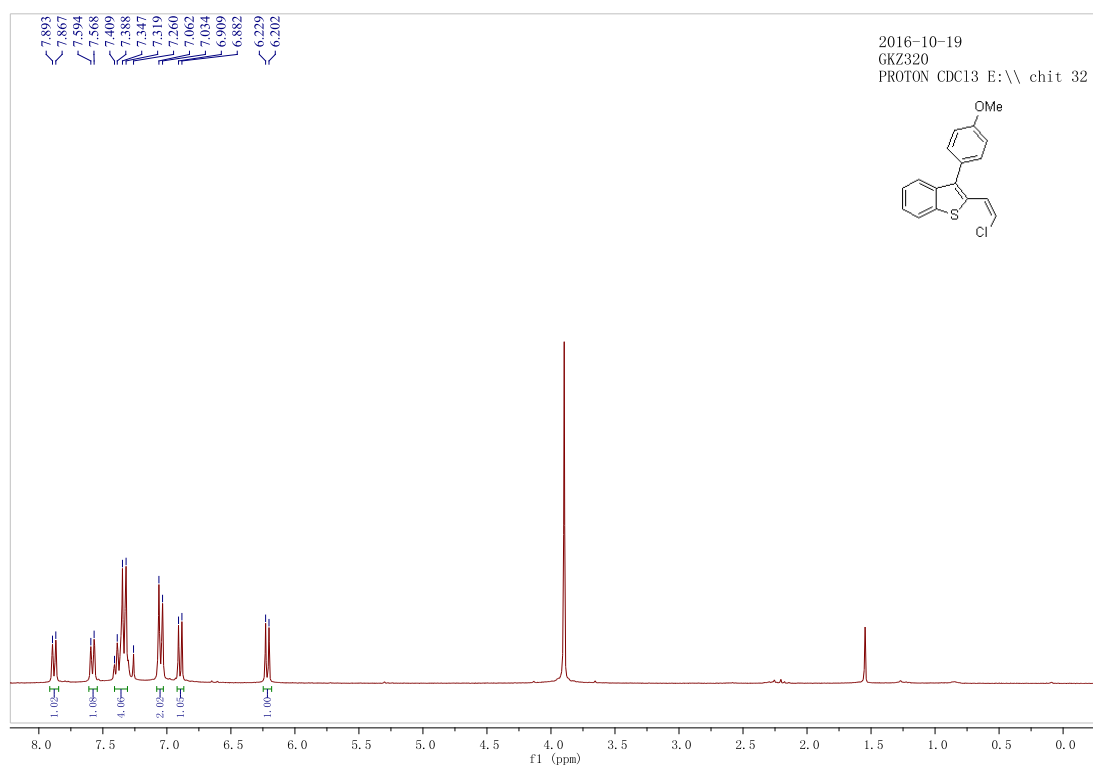

**Fig. 70**  $^1\text{H}$  NMR of (Z)-2-(2-chlorovinyl)-3-(4-methoxyphenyl)benzo[b]thiophene **8b**

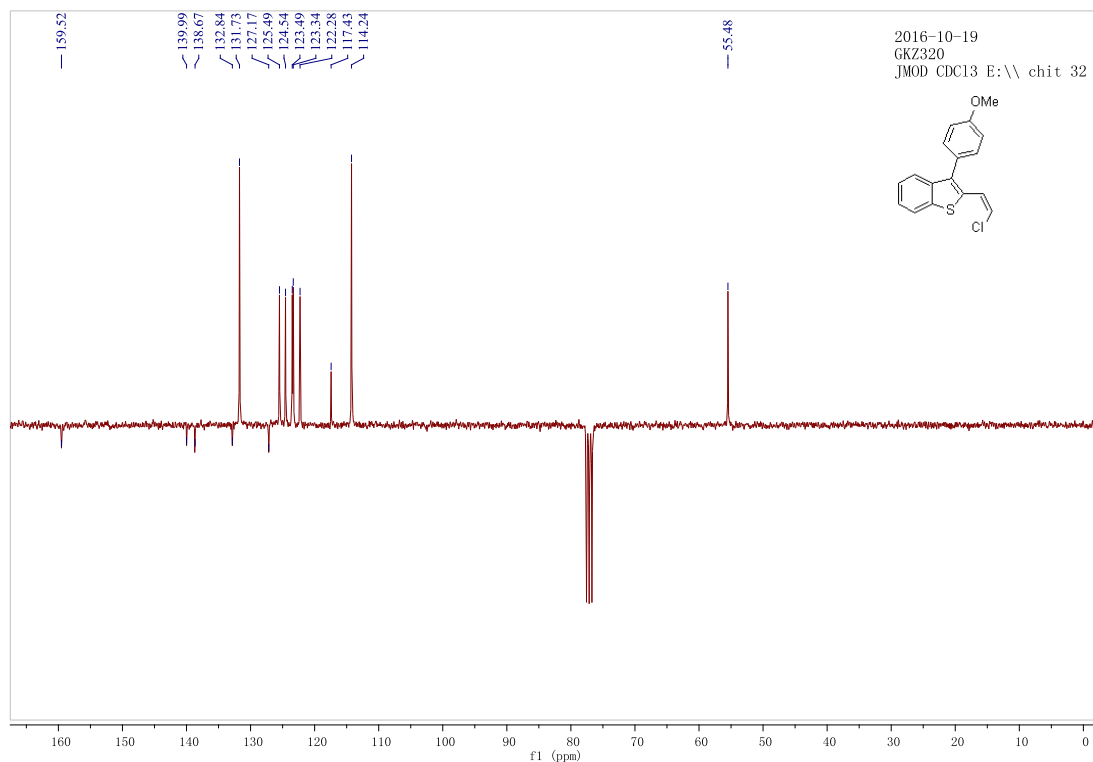

**Fig. 71**  $^{13}\text{C}$  NMR of (Z)-2-(2-(2-chlorovinyl)-3-(4-methoxyphenyl)benzo[b]thiophene **8b**

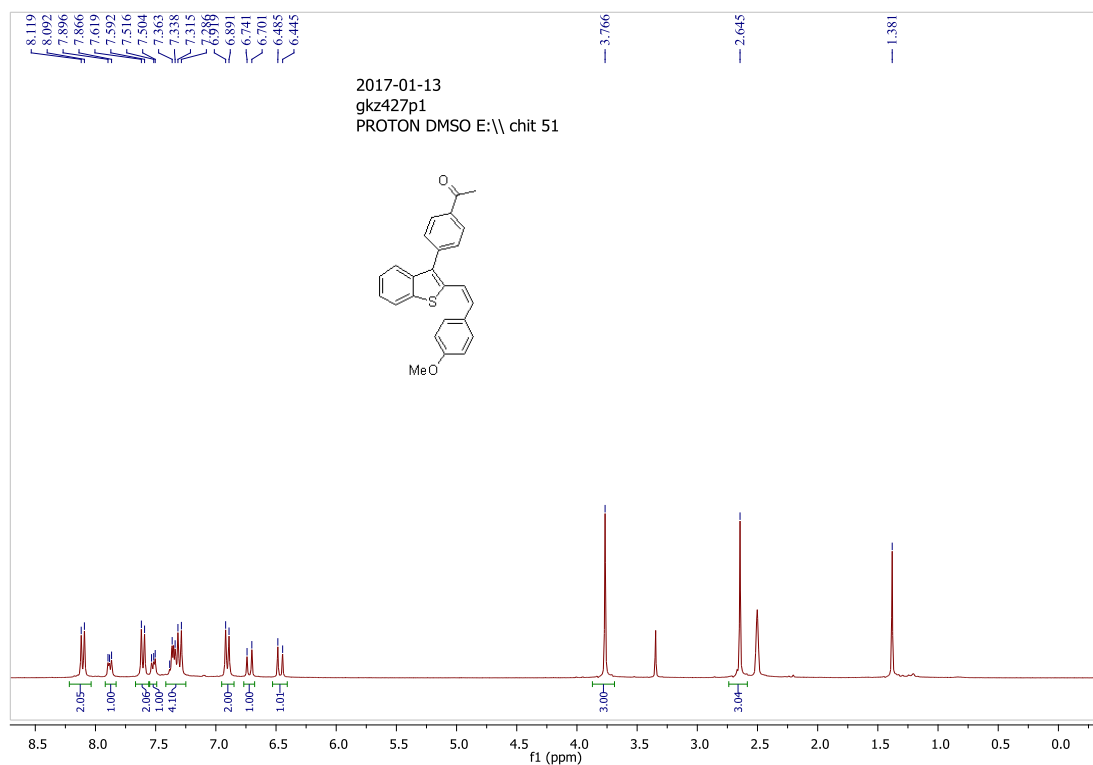

**Fig. 72**  $^1\text{H}$  NMR of (Z)-1-(4-(2-(4-methoxystyryl)benzo[b]thiophen-3-yl)phenyl)ethanone **1a1**

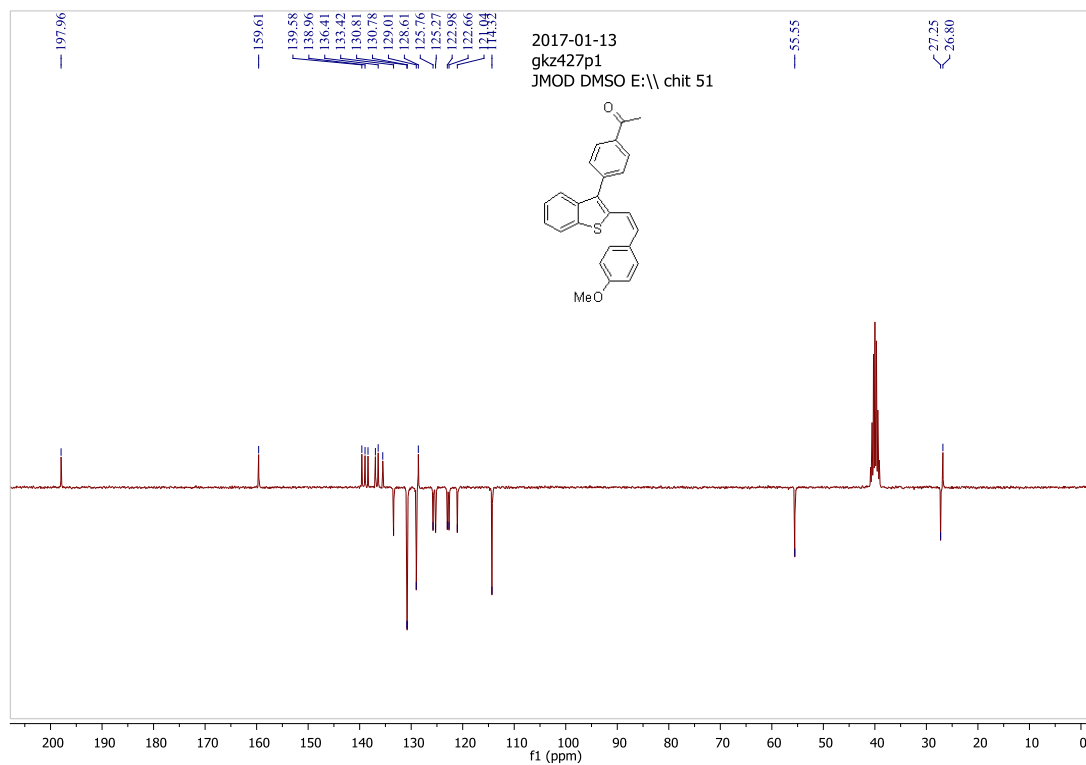

**Fig. 73**  $^{13}\text{C}$  NMR of (Z)-1-(4-(2-(4-methoxystyryl)benzo[b]thiophen-3-yl)phenyl)ethanone **1a**

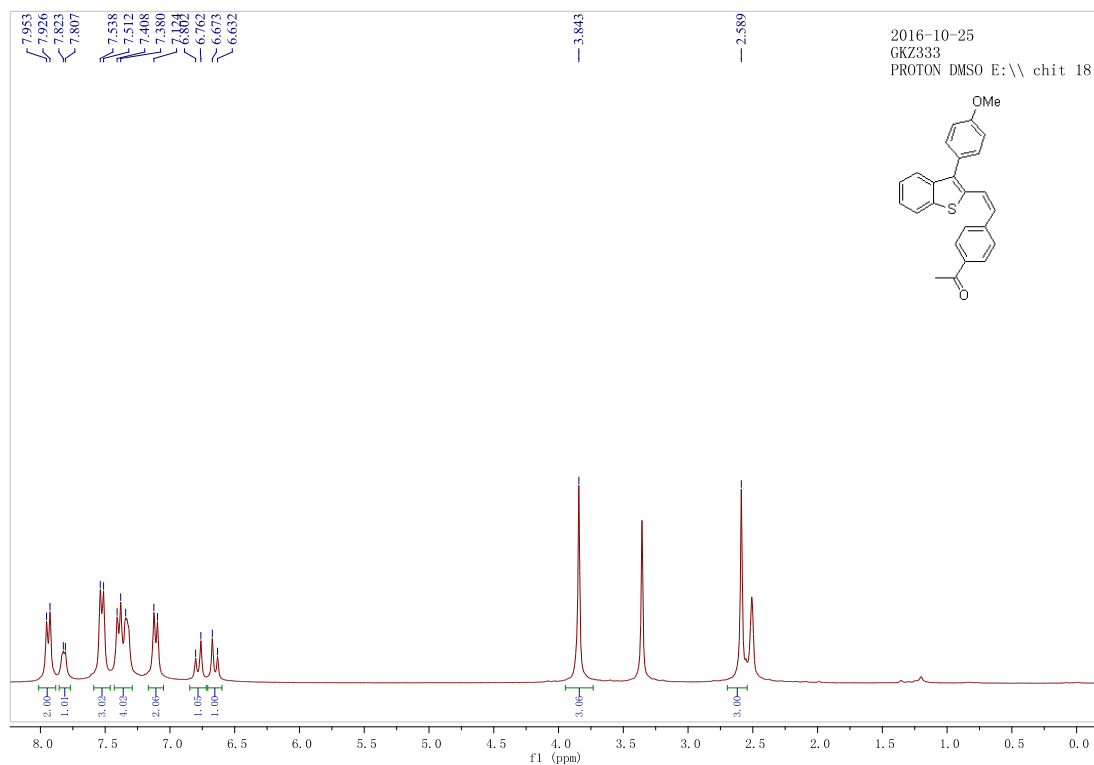

**Fig. 74**  $^1\text{H}$  NMR of (Z)-1-(4-(2-(3-(4-methoxyphenyl)benzo[b]thiophen-2-yl)vinyl)phenyl)ethanone **1am**

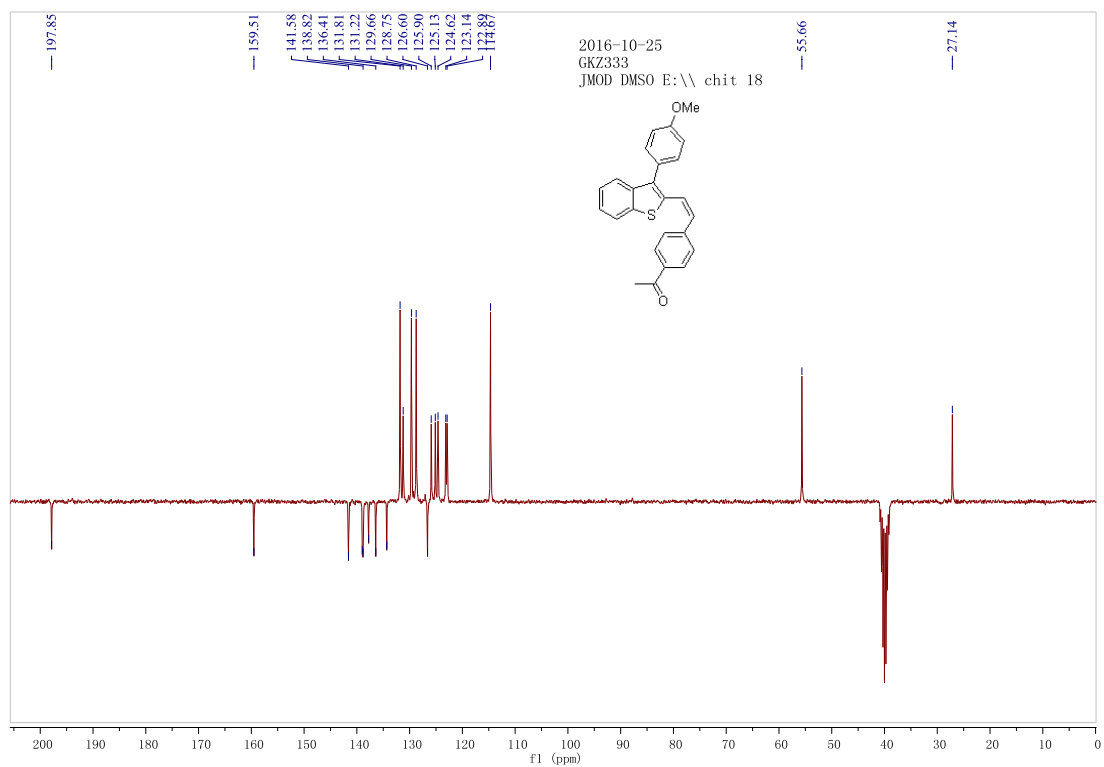

**Fig. 75**  $^{13}\text{C}$  NMR of (Z)-1-(4-(2-(3-(4-methoxyphenyl)benzo[b]thiophen-2-yl)vinyl)phenyl)ethanone **1am**

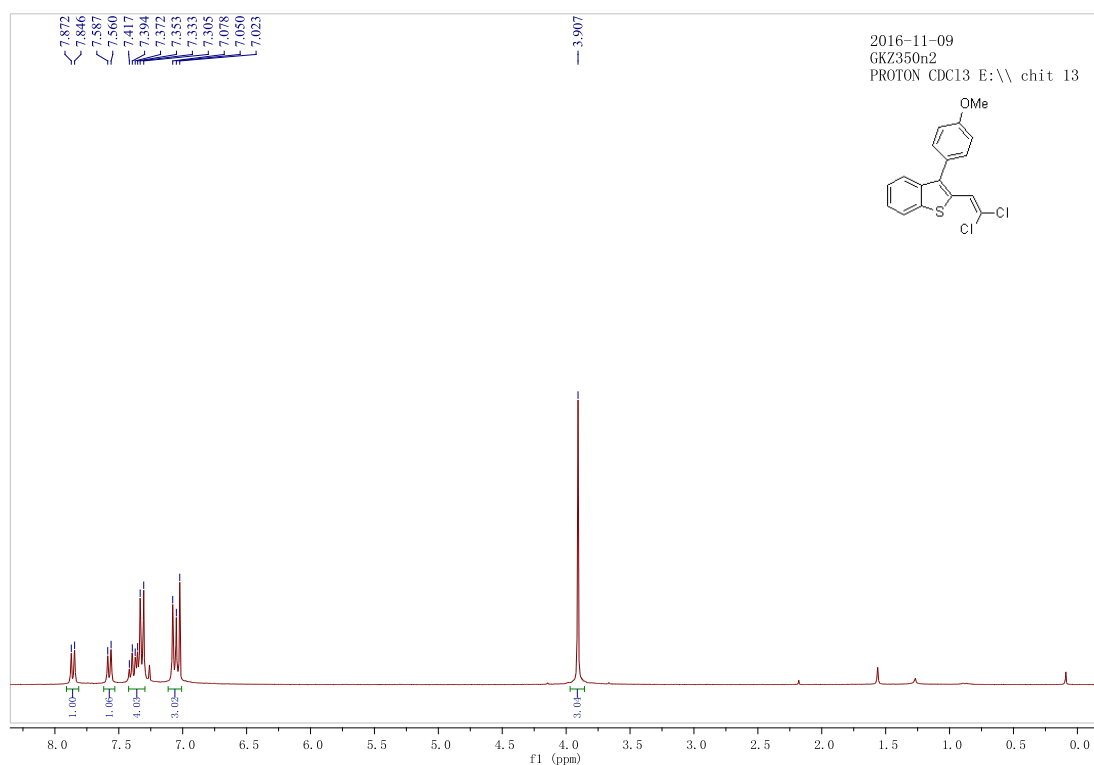

**Fig. 76**  $^1\text{H}$  NMR of 2-(2,2-dichlorovinyl)-3-(4-methoxyphenyl)benzo[b]thiophene **15**

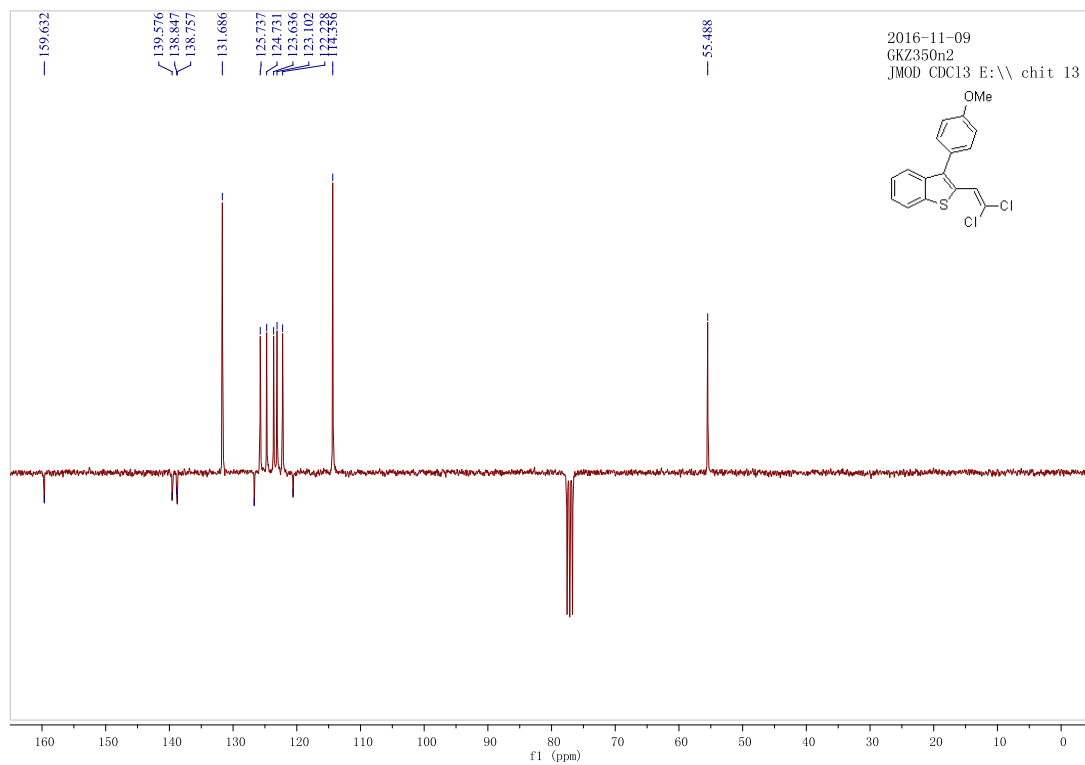

**Fig. 77**  $^{13}\text{C}$  NMR of 2-(2,2-dichlorovinyl)-3-(4-methoxyphenyl)benzo[b]thiophene **15**

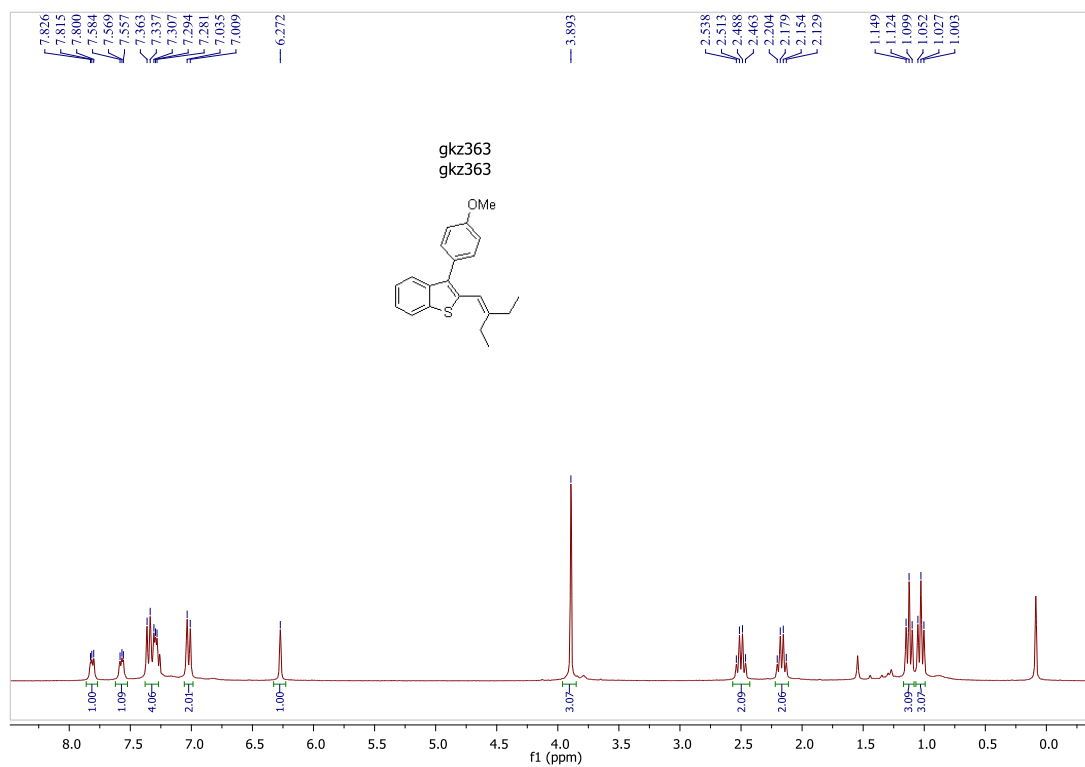

**Fig. 78**  $^1\text{H}$  NMR of 2-(2-ethylbut-1-en-1-yl)-3-(4-methoxyphenyl)benzo[b]thiophene **16**



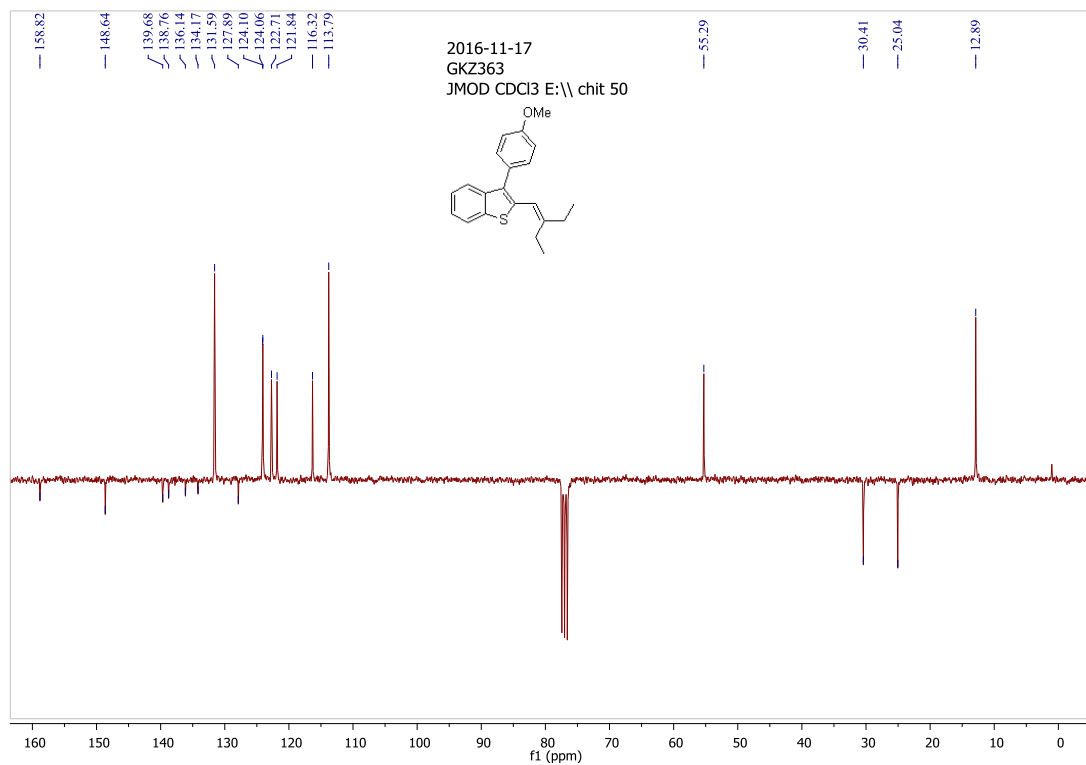

**Fig. 79**  $^{13}\text{C}$  NMR of 2-(2-ethylbut-1-en-1-yl)-3-(4-methoxyphenyl)benzo[b]thiophene **16**

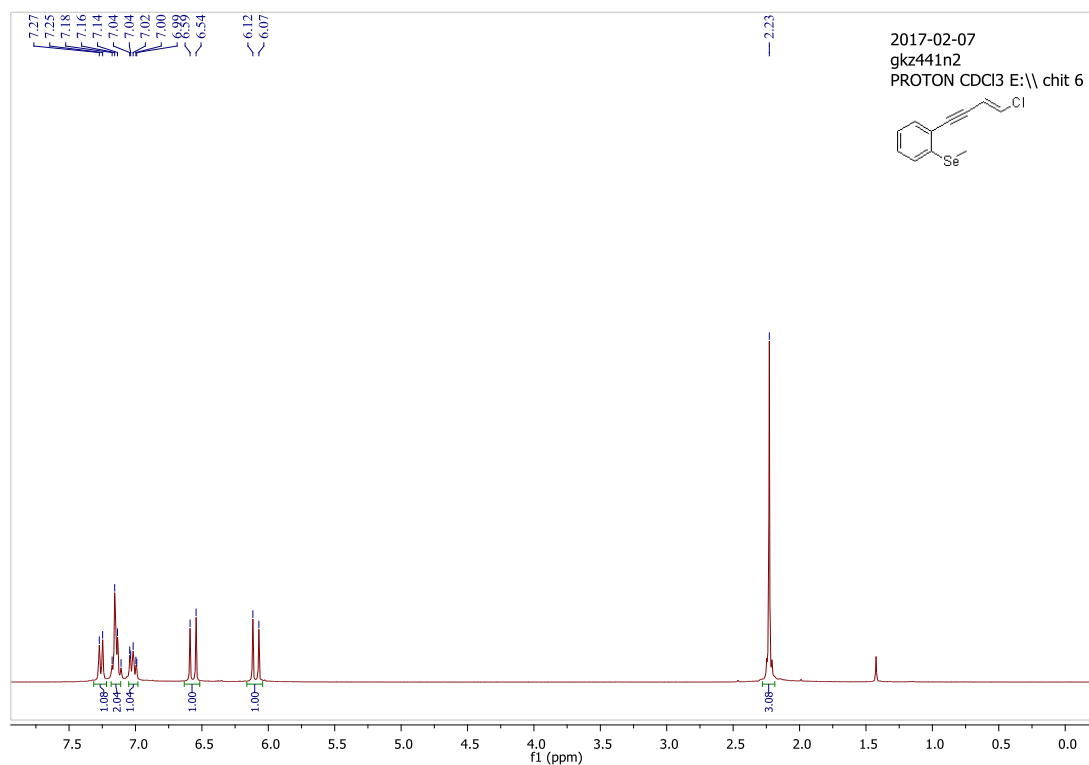

**Fig. 80**  $^1\text{H}$  NMR of (*E*)-(2-(4-chlorobut-3-en-1-yn-1-yl)phenyl)(methyl)selane **18**

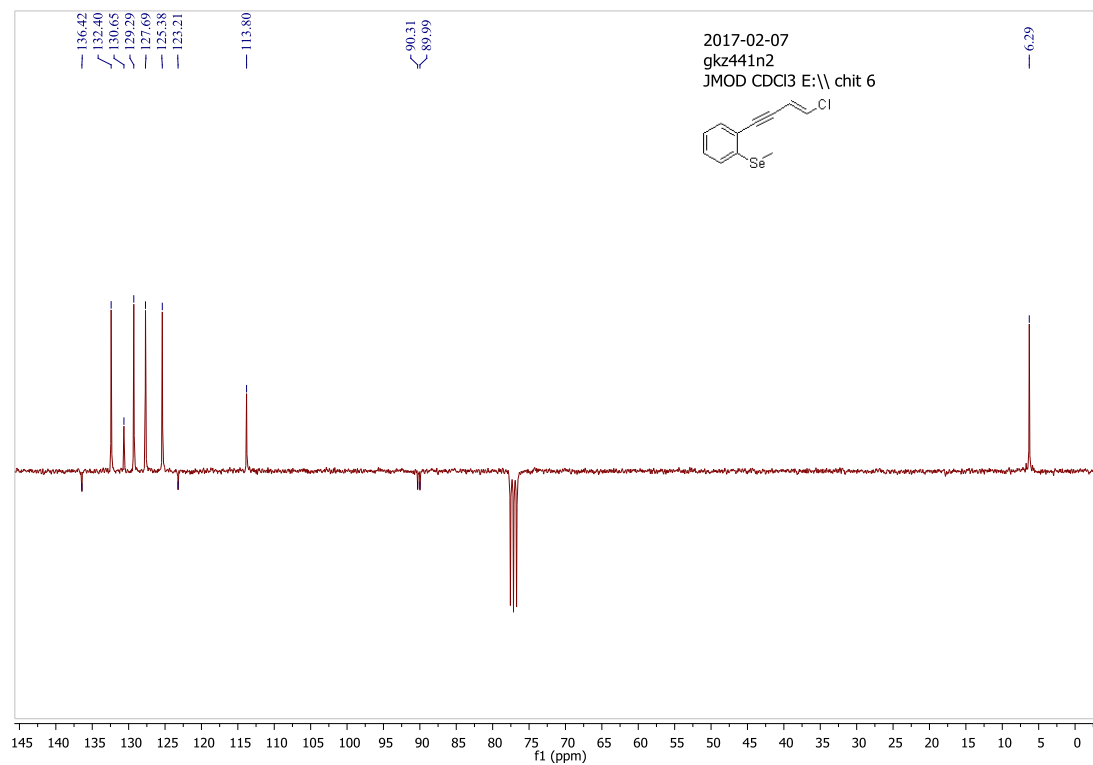

**Fig. 81**  $^{13}\text{C}$  NMR of (*E*)-(2-(4-chlorobut-3-en-1-yn-1-yl)phenyl)(methyl)selane **18**

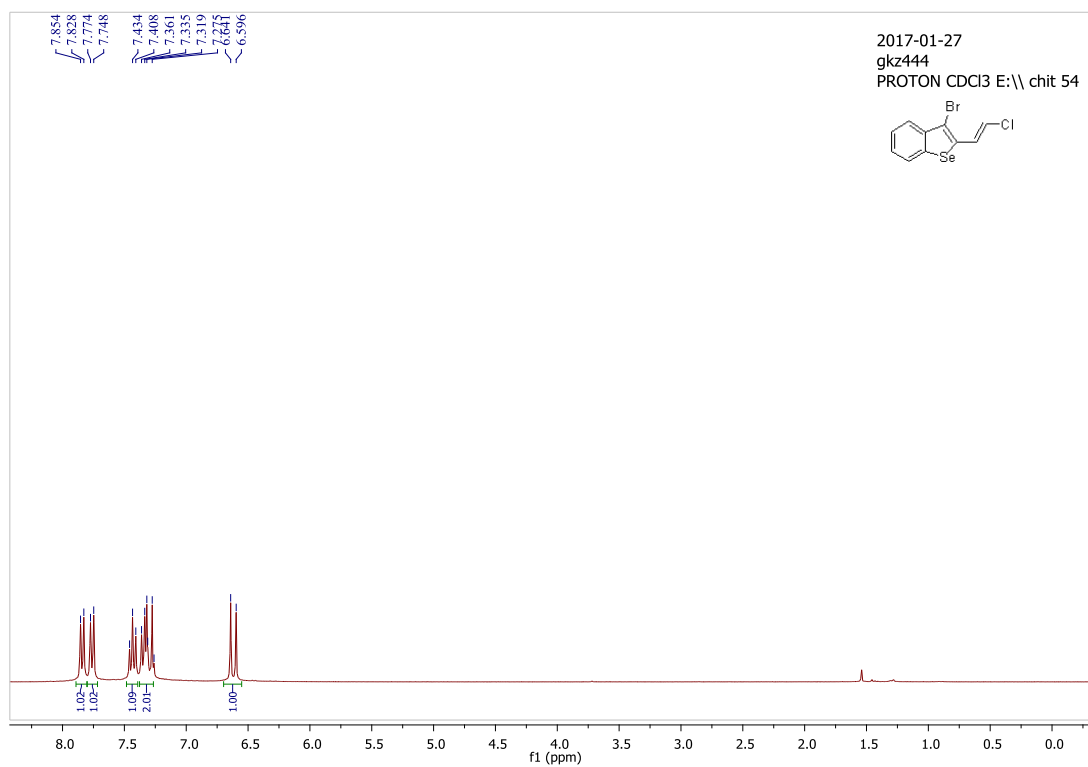

**Fig. 82**  $^1\text{H}$  NMR of (*E*)-3-bromo-2-(2-chlorovinyl)benzo[b]selenophene **19**

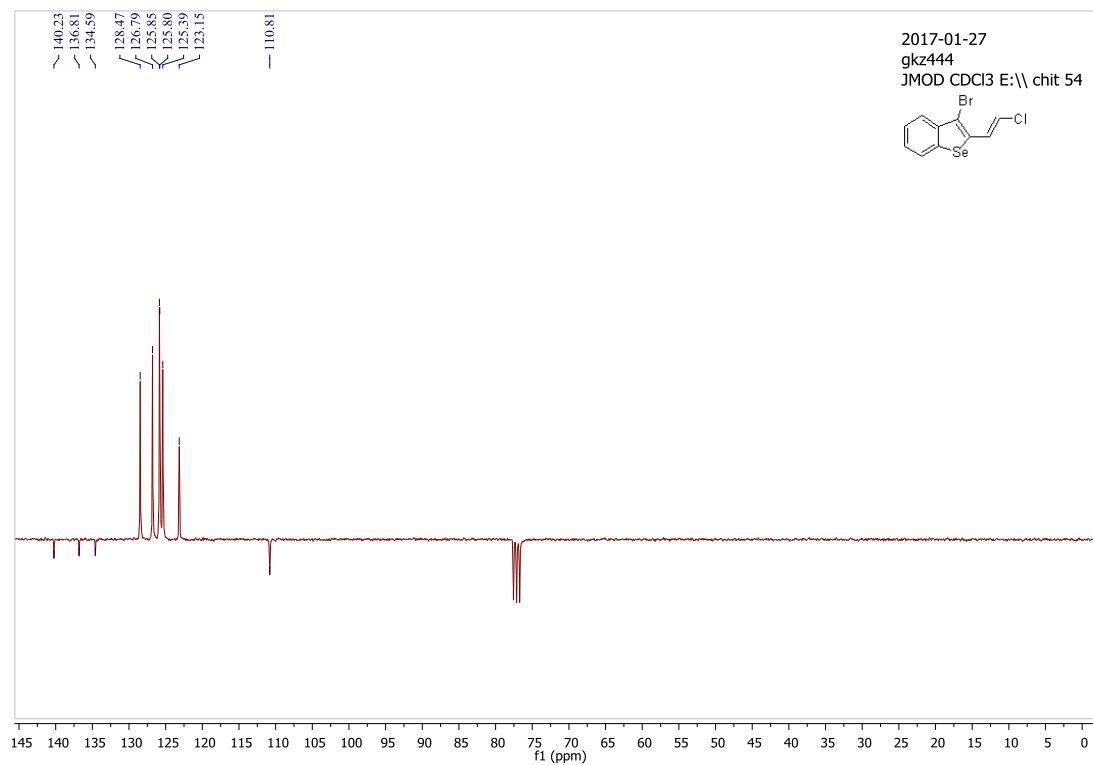

**Fig. 83**  $^{13}\text{C}$  NMR of (*E*)-3-bromo-2-(2-chlorovinyl)benzo[b]selenophene **29**
